# Supplementary material for: The Contribution of Preschool Meals to the Diet of Finnish Preschoolers
Source: MDPI journal article supplement (doi:10.3390/nu11071531), 2019-07-05
Supplement: s1 [file s1]

Table S 1: Mean (SD) intake and population proportion of energy and nutrients on weekdays among 3- to 4-year-old children who eat three meals at preschool. Results for days when the child ate the meal.

|                              | Breakfast,<br>outside<br>preschool<br><br>n=94 | Breakfast,<br>preschool<br><br>n=324 | Lunch,<br>preschool<br><br>n=324 | Afternoon<br>snack,<br>preschool<br><br>n=324 | Dinner,<br>outside<br>preschool<br><br>n=317 | Evening<br>snack,<br>outside<br>preschool<br>n=306 | Other<br>snack,<br>outside<br>preschool<br>n=204 |
|------------------------------|------------------------------------------------|--------------------------------------|----------------------------------|-----------------------------------------------|----------------------------------------------|----------------------------------------------------|--------------------------------------------------|
| Energy, MJ                   | 0.50 (0.33)                                    | 0.77 (0.29)                          | 1.37 (0.51)                      | 0.90 (0.36)                                   | 1.21 (0.47)                                  | 0.98 (0.45)                                        | 0.76 (0.61)                                      |
| Protein, g                   | 4 (3)                                          | 7 (3)                                | 15 (7)                           | 8 (3)                                         | 16 (7)                                       | 8 (5)                                              | 4 (4)                                            |
| Carbohydrate, g              | 17 (10)                                        | 24 (10)                              | 35 (13)                          | 29 (13)                                       | 27 (12)                                      | 31 (14)                                            | 26 (21)                                          |
| Sucrose, g                   | 4 (4)                                          | 2 (3)                                | 2 (2)                            | 7 (6)                                         | 3 (4)                                        | 8 (6)                                              | 11 (11)                                          |
| Added sugar, g               | 3 (5)                                          | 1 (3)                                | 1 (2)                            | 6 (6)                                         | 2 (4)                                        | 6 (7)                                              | 10 (12)                                          |
| Fiber, g                     | 1.6 (1.3)                                      | 2.8 (1.5)                            | 3.7 (1.5)                        | 2.6 (1.5)                                     | 2.2 (1.4)                                    | 3 (1.9)                                            | 1.8 (1.8)                                        |
| Fat, g                       | 3 (4)                                          | 6 (4)                                | 13 (6)                           | 7 (4)                                         | 12 (6)                                       | 8 (6)                                              | 6 (7)                                            |
| SAFA, g                      | 1.5 (1.7)                                      | 1.8 (1.2)                            | 4.1 (2.3)                        | 2.5 (1.7)                                     | 4.5 (2.9)                                    | 3.2 (2.5)                                          | 2.7 (3.2)                                        |
| MUFA, g                      | 1 (1.3)                                        | 2.0 (1.5)                            | 4.8 (2.6)                        | 2.3 (1.4)                                     | 4.3 (2.4)                                    | 2.3 (2.1)                                          | 1.9 (2.3)                                        |
| PUFA, g                      | 0.5 (0.7)                                      | 1.2 (0.9)                            | 2.5 (1.4)                        | 1.3 (0.9)                                     | 1.7 (1.3)                                    | 1.1 (1.1)                                          | 0.7 (1.0)                                        |
| Vitamin A, $\mu\text{g}$ RAE | 49 (102)                                       | 71 (56)                              | 144 (126)                        | 96 (104)                                      | 198 (522)                                    | 79 (106)                                           | 52 (109)                                         |
| Vitamin D, $\mu\text{g}$     | 0.8 (0.9)                                      | 2.4 (1.2)                            | 2.8 (1.5)                        | 2.2 (1.1)                                     | 1.7 (1.5)                                    | 1.5 (1.3)                                          | 0.6 (1.0)                                        |
| Vitamin E, mg                | 0.5 (0.7)                                      | 1.0 (0.6)                            | 1.8 (1.0)                        | 1.1 (0.7)                                     | 1.4 (0.9)                                    | 0.9 (0.9)                                          | 0.7 (0.7)                                        |
| Thiamine, mg                 | 0.06 (0.06)                                    | 0.10 (0.05)                          | 0.27 (0.14)                      | 0.11 (0.05)                                   | 0.21 (0.11)                                  | 0.13 (0.08)                                        | 0.06 (0.07)                                      |
| Riboflavin, mg               | 0.16 (0.15)                                    | 0.29 (0.13)                          | 0.39 (0.15)                      | 0.3 (0.14)                                    | 0.38 (0.21)                                  | 0.3 (0.19)                                         | 0.14 (0.16)                                      |
| Niacin<br>equivalents, mg    | 1.4 (1.2)                                      | 2.5 (1.1)                            | 5.5 (2.8)                        | 2.4 (1.0)                                     | 5.8 (2.8)                                    | 2.7 (1.6)                                          | 1.3 (1.4)                                        |
| Vitamin B6, mg               | 0.1 (0.1)                                      | 0.1 (0.1)                            | 0.3 (0.2)                        | 0.2 (0.1)                                     | 0.3 (0.1)                                    | 0.2 (0.2)                                          | 0.1 (0.2)                                        |
| Folate, $\mu\text{g}$        | 14 (13)                                        | 21 (11)                              | 42 (19)                          | 24 (11)                                       | 35 (37)                                      | 25 (17)                                            | 14 (15)                                          |
| Vitamin B12, $\mu\text{g}$   | 0.3 (0.3)                                      | 0.6 (0.3)                            | 1.1 (0.7)                        | 0.6 (0.3)                                     | 1.5 (2.6)                                    | 0.6 (0.9)                                          | 0.2 (0.4)                                        |
| Vitamin C, mg                | 9 (11)                                         | 8 (9)                                | 14 (9)                           | 12 (18)                                       | 15 (15)                                      | 13 (14)                                            | 10 (16)                                          |
| Salt, g                      | 0.3 (0.3)                                      | 1.0 (0.5)                            | 1.6 (0.7)                        | 0.6 (0.3)                                     | 1.3 (0.6)                                    | 0.7 (0.4)                                          | 0.3 (0.4)                                        |
| Potassium, mg                | 241 (152)                                      | 338 (126)                            | 813 (332)                        | 371 (152)                                     | 609 (287)                                    | 409 (200)                                          | 227 (199)                                        |
| Phosphorous, g               | 98 (87)                                        | 198 (79)                             | 291 (103)                        | 194 (84)                                      | 261 (117)                                    | 198 (108)                                          | 89 (96)                                          |
| Calcium, mg                  | 100 (99)                                       | 178 (80)                             | 206 (90)                         | 190 (94)                                      | 193 (115)                                    | 195 (126)                                          | 84 (109)                                         |
| Magnesium, mg                | 24 (18)                                        | 42 (17)                              | 65 (22)                          | 39 (17)                                       | 49 (21)                                      | 42 (21)                                            | 23 (21)                                          |
| Iron, mg                     | 0.6 (0.7)                                      | 1.2 (0.6)                            | 1.9 (0.8)                        | 0.9 (0.5)                                     | 1.7 (1.1)                                    | 1.2 (0.8)                                          | 0.6 (0.6)                                        |
| Zinc, mg                     | 0.7 (0.7)                                      | 1.2 (0.6)                            | 2.1 (0.9)                        | 1.2 (0.6)                                     | 2.0 (1.0)                                    | 1.3 (0.7)                                          | 0.6 (0.7)                                        |
| Iodine, $\mu\text{g}$        | 13 (15)                                        | 40 (19)                              | 47 (27)                          | 27 (14)                                       | 48 (24)                                      | 29 (18)                                            | 12 (16)                                          |

Table S 2: Mean (SD) intake and population proportion of energy and nutrients on weekdays among 5- to 6-year-old children who eat three meals at preschool. Results for days when the child ate the meal.

|                           | Breakfast,<br>outside<br>preschool<br>n=76 | Breakfast,<br>preschool<br>n=233 | Lunch,<br>preschool<br>n=233 | Afternoon<br>snack,<br>preschool<br>n=233 | Dinner,<br>outside<br>preschool<br>n=224 | Evening<br>snack,<br>outside<br>preschool<br>n=222 | Other<br>snack,<br>outside<br>preschool<br>n=148 |
|---------------------------|--------------------------------------------|----------------------------------|------------------------------|-------------------------------------------|------------------------------------------|----------------------------------------------------|--------------------------------------------------|
| Energy, MJ                | 0.57 (0.40)                                | 0.85 (0.28)                      | 1.58 (0.61)                  | 1.03 (0.42)                               | 1.42 (0.59)                              | 1.05 (0.49)                                        | 0.92 (0.67)                                      |
| Protein, g                | 4 (4)                                      | 8 (3)                            | 18 (8)                       | 9 (4)                                     | 18 (8)                                   | 9 (5)                                              | 4 (5)                                            |
| Carbohydrate, g           | 19 (11)                                    | 27 (10)                          | 40 (14)                      | 33 (15)                                   | 33 (16)                                  | 33 (17)                                            | 33 (26)                                          |
| Sucrose, g                | 5 (6)                                      | 2 (3)                            | 3 (3)                        | 8 (7)                                     | 4 (6)                                    | 8 (6)                                              | 14 (14)                                          |
| Added sugar, g            | 4 (6)                                      | 1 (3)                            | 2 (3)                        | 7 (7)                                     | 3 (6)                                    | 6 (6)                                              | 14 (17)                                          |
| Fiber, g                  | 1.6 (1.1)                                  | 3.2 (1.7)                        | 4.2 (1.7)                    | 2.7 (1.4)                                 | 2.4 (1.4)                                | 3.2 (2.2)                                          | 1.9 (1.9)                                        |
| Fat, g                    | 4 (6)                                      | 6 (3)                            | 15 (7)                       | 8 (4)                                     | 14 (8)                                   | 8 (6)                                              | 7 (7)                                            |
| SAFA, g                   | 1.8 (2.6)                                  | 1.9 (1.3)                        | 4.8 (2.5)                    | 3.0 (2.0)                                 | 5.1 (3.3)                                | 3.3 (2.7)                                          | 2.8 (3.1)                                        |
| MUFA, g                   | 1.3 (1.9)                                  | 2.1 (1.3)                        | 5.6 (2.9)                    | 2.8 (1.7)                                 | 5.1 (3)                                  | 2.3 (1.9)                                          | 2.2 (2.6)                                        |
| PUFA, g                   | 0.6 (0.9)                                  | 1.2 (0.8)                        | 3 (1.8)                      | 1.5 (0.9)                                 | 2.1 (1.6)                                | 1.1 (1.2)                                          | 1.0 (1.3)                                        |
| Vitamin A, $\mu$ g RAE    | 31 (39)                                    | 73 (54)                          | 212 (289)                    | 105 (87)                                  | 176 (594)                                | 82 (129)                                           | 41 (65)                                          |
| Vitamin D, $\mu$ g        | 0.8 (1.1)                                  | 2.5 (1.2)                        | 3.1 (2.4)                    | 2.6 (1.3)                                 | 2 (1.9)                                  | 1.7 (1.3)                                          | 0.6 (1.0)                                        |
| Vitamin E, mg             | 0.6 (0.7)                                  | 1.0 (0.6)                        | 2.2 (1.4)                    | 1.3 (0.6)                                 | 1.7 (1.3)                                | 1.0 (1.0)                                          | 0.8 (0.8)                                        |
| Thiamine, mg              | 0.08 (0.09)                                | 0.11 (0.06)                      | 0.3 (0.17)                   | 0.12 (0.05)                               | 0.24 (0.13)                              | 0.15 (0.11)                                        | 0.07 (0.07)                                      |
| Riboflavin, mg            | 0.16 (0.16)                                | 0.31 (0.14)                      | 0.45 (0.19)                  | 0.34 (0.15)                               | 0.43 (0.26)                              | 0.35 (0.22)                                        | 0.15 (0.17)                                      |
| Niacin<br>equivalents, mg | 1.6 (1.9)                                  | 2.8 (1.1)                        | 6.2 (3.5)                    | 2.7 (1.2)                                 | 6.6 (3)                                  | 3.2 (1.9)                                          | 1.6 (1.6)                                        |
| Vitamin B6, mg            | 0.1 (0.1)                                  | 0.2 (0.1)                        | 0.4 (0.2)                    | 0.2 (0.1)                                 | 0.3 (0.1)                                | 0.2 (0.2)                                          | 0.2 (0.2)                                        |
| Folate, $\mu$ g           | 16 (15)                                    | 24 (14)                          | 51 (39)                      | 25 (11)                                   | 37 (43)                                  | 30 (19)                                            | 16 (15)                                          |
| Vitamin B12, $\mu$ g      | 0.3 (0.6)                                  | 0.6 (0.4)                        | 1.3 (1.1)                    | 0.7 (0.3)                                 | 1.6 (3.0)                                | 0.6 (0.4)                                          | 0.2 (0.4)                                        |
| Vitamin C, mg             | 12 (17)                                    | 9 (11)                           | 16 (9)                       | 11 (9)                                    | 15 (13)                                  | 17 (23)                                            | 12 (21)                                          |
| Salt, g                   | 0.4 (0.6)                                  | 1.2 (0.5)                        | 1.8 (0.8)                    | 0.7 (0.3)                                 | 1.5 (0.7)                                | 0.8 (0.5)                                          | 0.4 (0.4)                                        |
| Potassium, mg             | 245 (191)                                  | 381 (148)                        | 935 (399)                    | 410 (167)                                 | 704 (315)                                | 456 (253)                                          | 266 (227)                                        |
| Phosphorous, g            | 108 (110)                                  | 217 (80)                         | 333 (135)                    | 217 (95)                                  | 298 (136)                                | 222 (125)                                          | 100 (102)                                        |
| Calcium, mg               | 97 (108)                                   | 189 (89)                         | 232 (100)                    | 211 (114)                                 | 224 (138)                                | 219 (144)                                          | 98 (115)                                         |
| Magnesium, mg             | 24 (17)                                    | 47 (17)                          | 74 (28)                      | 43 (18)                                   | 55 (23)                                  | 46 (26)                                            | 28 (22)                                          |
| Iron, mg                  | 0.7 (0.6)                                  | 1.3 (0.7)                        | 2.2 (1.1)                    | 1.0 (0.5)                                 | 2.0 (1.5)                                | 1.2 (0.8)                                          | 0.8 (0.7)                                        |
| Zinc, mg                  | 0.7 (0.7)                                  | 1.4 (0.6)                        | 2.4 (1.2)                    | 1.3 (0.6)                                 | 2.4 (1.2)                                | 1.4 (0.8)                                          | 0.7 (0.7)                                        |
| Iodine, $\mu$ g           | 15 (19)                                    | 45 (19)                          | 53 (34)                      | 31 (14)                                   | 56 (30)                                  | 32 (21)                                            | 13 (16)                                          |

Table S 3: Sources of energy (mean and population proportion) in the diet on weekdays among Finnish 3- to 4-year-old preschool children who eat three meals at preschool. Main food groups and selected food groups are presented.

|                                                 | Outside preschool |              | Preschool   |              | Total       |              |
|-------------------------------------------------|-------------------|--------------|-------------|--------------|-------------|--------------|
|                                                 | kJ/day            | %            | kJ/day      | %            | kJ/day      | %            |
| <b>Vegetables, vegetable dishes</b>             | <b>102</b>        | <b>4.0</b>   | <b>106</b>  | <b>3.5</b>   | <b>208</b>  | <b>3.7</b>   |
| <b>Potatoes, potato dishes</b>                  | <b>80</b>         | <b>3.2</b>   | <b>133</b>  | <b>4.4</b>   | <b>213</b>  | <b>3.8</b>   |
| <b>Fruit, berries, fruit and berry products</b> | <b>213</b>        | <b>8.4</b>   | <b>203</b>  | <b>6.7</b>   | <b>416</b>  | <b>7.4</b>   |
| fresh fruit                                     | 151               | 5.9          | 62          | 2.0          | 213         | 3.8          |
| fruit and berry soups                           | 8                 | 0.3          | 73          | 2.4          | 80          | 1.4          |
| 100% juice                                      | 15                | 0.6          | 13          | 0.4          | 29          | 0.5          |
| <b>Cereals, bakery products</b>                 | <b>672</b>        | <b>26.4</b>  | <b>887</b>  | <b>29.2</b>  | <b>1559</b> | <b>27.9</b>  |
| rye bread                                       | 66                | 2.6          | 112         | 3.7          | 178         | 3.2          |
| rye crispbread                                  | 19                | 0.7          | 125         | 4.1          | 143         | 2.6          |
| multi-grain bread                               | 99                | 3.9          | 220         | 7.2          | 319         | 5.7          |
| white bread                                     | 33                | 1.3          | 30          | 1.0          | 62          | 1.1          |
| porridge                                        | 84                | 3.3          | 247         | 8.1          | 331         | 5.9          |
| rice, pasta, etc.                               | 95                | 3.7          | 44          | 1.4          | 139         | 2.5          |
| buns, sweet bakery                              | 65                | 2.6          | 8           | 0.3          | 74          | 1.3          |
| biscuits and muesli bars                        | 61                | 2.4          | 12          | 0.4          | 72          | 1.3          |
| savoury bakery products, hamburgers, pizza      | 73                | 2.9          | 23          | 0.8          | 96          | 1.7          |
| pancakes, crêpes                                | 22                | 0.9          | 37          | 1.2          | 59          | 1.0          |
| <b>Fats, oils, gravy</b>                        | <b>134</b>        | <b>5.2</b>   | <b>382</b>  | <b>12.6</b>  | <b>516</b>  | <b>9.2</b>   |
| margarine and fat spread                        | 50                | 2.0          | 363         | 11.9         | 414         | 7.4          |
| blended spread                                  | 63                | 2.5          | 0           | 0.0          | 63          | 1.1          |
| <b>Fish, fish dishes</b>                        | <b>74</b>         | <b>2.9</b>   | <b>154</b>  | <b>5.1</b>   | <b>228</b>  | <b>4.1</b>   |
| <b>Eggs, egg dishes</b>                         | <b>17</b>         | <b>0.7</b>   | <b>14</b>   | <b>0.5</b>   | <b>31</b>   | <b>0.5</b>   |
| <b>Meat, meat dishes</b>                        | <b>458</b>        | <b>18.0</b>  | <b>474</b>  | <b>15.6</b>  | <b>932</b>  | <b>16.7</b>  |
| cold cuts                                       | 17                | 0.7          | 14          | 0.5          | 31          | 0.6          |
| red meat dishes                                 | 293               | 11.5         | 257         | 8.4          | 550         | 9.8          |
| poultry dishes                                  | 101               | 4.0          | 112         | 3.7          | 213         | 3.8          |
| sausage dishes                                  | 45                | 1.8          | 88          | 2.9          | 133         | 2.4          |
| <b>Milk, dairy products</b>                     | <b>587</b>        | <b>23.1</b>  | <b>628</b>  | <b>20.7</b>  | <b>1215</b> | <b>21.7</b>  |
| skimmed milk                                    | 111               | 4.4          | 373         | 12.3         | 484         | 8.7          |
| milk with 1-1.5% fat content                    | 157               | 6.2          | 90          | 2.9          | 246         | 4.4          |
| yoghurt and Finnish cultured milk               | 125               | 4.9          | 32          | 1.1          | 157         | 2.8          |
| cheese                                          | 81                | 3.2          | 43          | 1.4          | 124         | 2.2          |
| dairy-based desserts                            | 35                | 1.4          | 67          | 2.2          | 102         | 1.8          |
| ice-cream                                       | 29                | 1.1          | 6           | 0.2          | 35          | 0.6          |
| <b>Sugar, sweets</b>                            | <b>70</b>         | <b>2.7</b>   | <b>13</b>   | <b>0.4</b>   | <b>83</b>   | <b>1.5</b>   |
| <b>Drinks</b>                                   | <b>76</b>         | <b>3.0</b>   | <b>32</b>   | <b>1.0</b>   | <b>108</b>  | <b>1.9</b>   |
| sugar-sweetened juice                           | 43                | 1.7          | 9           | 0.3          | 53          | 0.9          |
| sugar-sweetened soda                            | 6                 | 0.2          | 0           | 0.0          | 6           | 0.1          |
| non-dairy milk substitutes                      | 18                | 0.7          | 22          | 0.7          | 40          | 0.7          |
| <b>Miscellaneous</b>                            | <b>62</b>         | <b>2.5</b>   | <b>16</b>   | <b>0.5</b>   | <b>79</b>   | <b>1.4</b>   |
| <b>Total</b>                                    | <b>2546</b>       | <b>100.0</b> | <b>3041</b> | <b>100.0</b> | <b>5587</b> | <b>100.0</b> |

Table S 4: Sources of energy (mean and population proportion) in the diet on weekdays among Finnish 5- to 6-year-old preschool children who eat three meals at preschool. Main food groups and selected food groups are presented.

|                                                 | Outside preschool |              | Preschool   |              | Total       |              |
|-------------------------------------------------|-------------------|--------------|-------------|--------------|-------------|--------------|
|                                                 | kJ/day            | %            | kJ/day      | %            | kJ/day      | %            |
| <b>Vegetables, vegetable dishes</b>             | <b>97</b>         | <b>3.3</b>   | <b>130</b>  | <b>3.7</b>   | <b>227</b>  | <b>3.6</b>   |
| <b>Potatoes, potato dishes</b>                  | <b>110</b>        | <b>3.8</b>   | <b>160</b>  | <b>4.6</b>   | <b>270</b>  | <b>4.2</b>   |
| <b>Fruit, berries, fruit and berry products</b> | <b>250</b>        | <b>8.6</b>   | <b>205</b>  | <b>5.9</b>   | <b>455</b>  | <b>7.1</b>   |
| fresh fruit                                     | 146               | 5.0          | 67          | 1.9          | 212         | 3.3          |
| fruit and berry soups                           | 18                | 0.6          | 61          | 1.8          | 79          | 1.2          |
| 100% juice                                      | 23                | 0.8          | 16          | 0.5          | 40          | 0.6          |
| <b>Cereals, bakery products</b>                 | <b>727</b>        | <b>25.0</b>  | <b>1022</b> | <b>29.5</b>  | <b>1749</b> | <b>27.5</b>  |
| rye bread                                       | 77                | 2.6          | 99          | 2.9          | 176         | 2.8          |
| rye crispbread                                  | 13                | 0.5          | 137         | 3.9          | 150         | 2.4          |
| multi-grain bread                               | 121               | 4.2          | 230         | 6.6          | 351         | 5.5          |
| white bread                                     | 41                | 1.4          | 56          | 1.6          | 98          | 1.5          |
| porridge                                        | 83                | 2.9          | 299         | 8.6          | 383         | 6.0          |
| rice, pasta, etc.                               | 103               | 3.5          | 52          | 1.5          | 155         | 2.4          |
| buns, sweet bakery                              | 52                | 1.8          | 12          | 0.4          | 64          | 1.0          |
| biscuits and muesli bars                        | 50                | 1.7          | 22          | 0.6          | 72          | 1.1          |
| savoury bakery products, hamburgers, pizza      | 100               | 3.4          | 40          | 1.2          | 140         | 2.2          |
| pancakes, crêpes                                | 15                | 0.5          | 41          | 1.2          | 56          | 0.9          |
| <b>Fats, oils, gravy</b>                        | <b>137</b>        | <b>4.7</b>   | <b>435</b>  | <b>12.6</b>  | <b>572</b>  | <b>9.0</b>   |
| margarine and fat spread                        | 49                | 1.7          | 412         | 11.9         | 461         | 7.2          |
| blended spread                                  | 59                | 2.0          | 1           | 0.0          | 60          | 0.9          |
| <b>Fish, fish dishes</b>                        | <b>88</b>         | <b>3.0</b>   | <b>163</b>  | <b>4.7</b>   | <b>251</b>  | <b>3.9</b>   |
| <b>Eggs, egg dishes</b>                         | <b>17</b>         | <b>0.6</b>   | <b>11</b>   | <b>0.3</b>   | <b>28</b>   | <b>0.4</b>   |
| <b>Meat, meat dishes</b>                        | <b>531</b>        | <b>18.3</b>  | <b>563</b>  | <b>16.3</b>  | <b>1095</b> | <b>17.2</b>  |
| cold cuts                                       | 20                | 0.7          | 19          | 0.5          | 39          | 0.6          |
| red meat dishes                                 | 343               | 11.8         | 309         | 8.9          | 652         | 10.2         |
| poultry dishes                                  | 108               | 3.7          | 153         | 4.4          | 261         | 4.1          |
| sausage dishes                                  | 57                | 2.0          | 72          | 2.1          | 130         | 2.0          |
| <b>Milk, dairy products</b>                     | <b>650</b>        | <b>22.4</b>  | <b>700</b>  | <b>20.2</b>  | <b>1350</b> | <b>21.2</b>  |
| skimmed milk                                    | 140               | 4.8          | 400         | 11.5         | 539         | 8.5          |
| milk with 1-1.5% fat content                    | 126               | 4.3          | 113         | 3.3          | 238         | 3.7          |
| yoghurt and Finnish cultured milk               | 149               | 5.1          | 26          | 0.8          | 175         | 2.7          |
| cheese                                          | 90                | 3.1          | 46          | 1.3          | 135         | 2.1          |
| dairy-based desserts                            | 46                | 1.6          | 81          | 2.3          | 127         | 2.0          |
| ice-cream                                       | 37                | 1.3          | 12          | 0.3          | 49          | 0.8          |
| <b>Sugar, sweets</b>                            | <b>137</b>        | <b>4.7</b>   | <b>25</b>   | <b>0.7</b>   | <b>162</b>  | <b>2.5</b>   |
| <b>Drinks</b>                                   | <b>83</b>         | <b>2.8</b>   | <b>27</b>   | <b>0.8</b>   | <b>110</b>  | <b>1.7</b>   |
| sugar-sweetened juice                           | 55                | 1.9          | 17          | 0.5          | 72          | 1.1          |
| sugar-sweetened soda                            | 14                | 0.5          | 0           | 0.0          | 14          | 0.2          |
| non-dairy milk substitutes                      | 13                | 0.4          | 10          | 0.3          | 23          | 0.4          |
| <b>Miscellaneous</b>                            | <b>80</b>         | <b>2.7</b>   | <b>22</b>   | <b>0.6</b>   | <b>102</b>  | <b>1.6</b>   |
| <b>Total</b>                                    | <b>2907</b>       | <b>100.0</b> | <b>3464</b> | <b>100.0</b> | <b>6371</b> | <b>100.0</b> |

Table S 5: Sources of protein (mean and population proportion) in the diet on weekdays among Finnish 3- to 4-year-old preschool children who eat three meals at preschool. Main food groups and selected food groups are presented.

|                                                 | Outside preschool |              | Preschool   |              | Total       |              |
|-------------------------------------------------|-------------------|--------------|-------------|--------------|-------------|--------------|
|                                                 | g/day             | %            | g/day       | %            | g/day       | %            |
| <b>Vegetables, vegetable dishes</b>             | <b>0.8</b>        | <b>3.3</b>   | <b>0.8</b>  | <b>2.7</b>   | <b>1.7</b>  | <b>3.0</b>   |
| <b>Potatoes, potato dishes</b>                  | <b>0.4</b>        | <b>1.7</b>   | <b>0.7</b>  | <b>2.4</b>   | <b>1.1</b>  | <b>2.0</b>   |
| <b>Fruit, berries, fruit and berry products</b> | <b>0.6</b>        | <b>2.2</b>   | <b>0.5</b>  | <b>1.7</b>   | <b>1.1</b>  | <b>1.9</b>   |
| <b>Cereals, bakery products</b>                 | <b>4.6</b>        | <b>17.9</b>  | <b>6.9</b>  | <b>22.4</b>  | <b>11.4</b> | <b>20.4</b>  |
| rye bread                                       | 0.5               | 2.1          | 0.9         | 3.1          | 1.5         | 2.6          |
| rye crispbread                                  | 0.1               | 0.6          | 1.0         | 3.3          | 1.2         | 2.1          |
| multi-grain bread                               | 0.8               | 2.9          | 1.7         | 5.7          | 2.5         | 4.4          |
| white bread                                     | 0.2               | 0.9          | 0.2         | 0.7          | 0.4         | 0.8          |
| porridge                                        | 0.8               | 3.0          | 2.0         | 6.4          | 2.7         | 4.8          |
| rice, pasta, etc.                               | 0.7               | 2.6          | 0.3         | 1.1          | 1.0         | 1.8          |
| <b>Fats, oils, gravy</b>                        | <b>0.1</b>        | <b>0.3</b>   | <b>0.0</b>  | <b>0.1</b>   | <b>0.1</b>  | <b>0.2</b>   |
| <b>Fish, fish dishes</b>                        | <b>1.4</b>        | <b>5.6</b>   | <b>2.5</b>  | <b>8.2</b>   | <b>3.9</b>  | <b>7.0</b>   |
| <b>Eggs, egg dishes</b>                         | <b>0.3</b>        | <b>1.3</b>   | <b>0.3</b>  | <b>0.9</b>   | <b>0.6</b>  | <b>1.1</b>   |
| <b>Meat, meat dishes</b>                        | <b>7.9</b>        | <b>30.8</b>  | <b>6.6</b>  | <b>21.7</b>  | <b>14.5</b> | <b>25.8</b>  |
| cold cuts                                       | 0.5               | 1.8          | 0.5         | 1.8          | 1.0         | 1.8          |
| red meat dishes                                 | 4.6               | 18.1         | 3.5         | 11.3         | 8.1         | 14.4         |
| poultry dishes                                  | 2.3               | 8.8          | 1.7         | 5.5          | 3.9         | 7.0          |
| sausage dishes                                  | 0.5               | 1.9          | 0.9         | 3.0          | 1.4         | 2.5          |
| <b>Milk, dairy products</b>                     | <b>8.8</b>        | <b>34.3</b>  | <b>12.0</b> | <b>39.1</b>  | <b>20.8</b> | <b>37.0</b>  |
| skimmed milk                                    | 2.5               | 9.6          | 8.2         | 26.9         | 10.7        | 19.0         |
| milk with 1-1.5% fat content                    | 2.6               | 10.1         | 1.7         | 5.5          | 4.3         | 7.6          |
| yoghurt and Finnish cultured milk               | 1.2               | 4.7          | 0.4         | 1.1          | 1.6         | 2.8          |
| cheese                                          | 1.5               | 5.9          | 0.9         | 2.8          | 2.4         | 4.2          |
| dairy-based desserts                            | 0.4               | 1.4          | 0.6         | 1.8          | 0.9         | 1.6          |
| <b>Sugar, sweets</b>                            | <b>0.2</b>        | <b>0.6</b>   | <b>0.0</b>  | <b>0.1</b>   | <b>0.2</b>  | <b>0.3</b>   |
| <b>Drinks</b>                                   | <b>0.2</b>        | <b>0.8</b>   | <b>0.1</b>  | <b>0.4</b>   | <b>0.3</b>  | <b>0.6</b>   |
| <b>Miscellaneous</b>                            | <b>0.3</b>        | <b>1.4</b>   | <b>0.1</b>  | <b>0.3</b>   | <b>0.4</b>  | <b>0.8</b>   |
| <b>Total</b>                                    | <b>25.6</b>       | <b>100.0</b> | <b>30.6</b> | <b>100.0</b> | <b>56.2</b> | <b>100.0</b> |

Table S 6: Sources of protein (mean and population proportion) in the diet on weekdays among Finnish 5- to 6-year-old preschool children who eat three meals at preschool. Main food groups and selected food groups are presented.

|                                                 | Outside preschool |              | Preschool   |              | Total       |              |
|-------------------------------------------------|-------------------|--------------|-------------|--------------|-------------|--------------|
|                                                 | g/day             | %            | g/day       | %            | g/day       | %            |
| <b>Vegetables, vegetable dishes</b>             | <b>0.8</b>        | <b>2.9</b>   | <b>1.0</b>  | <b>3.0</b>   | <b>1.9</b>  | <b>2.9</b>   |
| <b>Potatoes, potato dishes</b>                  | <b>0.5</b>        | <b>1.8</b>   | <b>0.8</b>  | <b>2.4</b>   | <b>1.4</b>  | <b>2.2</b>   |
| <b>Fruit, berries, fruit and berry products</b> | <b>0.7</b>        | <b>2.3</b>   | <b>0.5</b>  | <b>1.5</b>   | <b>1.2</b>  | <b>1.9</b>   |
| <b>Cereals, bakery products</b>                 | <b>5.2</b>        | <b>18.0</b>  | <b>7.6</b>  | <b>21.9</b>  | <b>12.8</b> | <b>20.1</b>  |
| rye bread                                       | 0.6               | 2.2          | 0.8         | 2.4          | 1.5         | 2.3          |
| rye crispbread                                  | 0.1               | 0.3          | 1.1         | 3.2          | 1.2         | 1.9          |
| multi-grain bread                               | 0.9               | 3.2          | 1.8         | 5.3          | 2.8         | 4.3          |
| white bread                                     | 0.3               | 1.0          | 0.4         | 1.1          | 0.7         | 1.0          |
| porridge                                        | 0.8               | 2.7          | 2.2         | 6.3          | 3.0         | 4.7          |
| rice, pasta, etc.                               | 0.7               | 2.6          | 0.4         | 1.1          | 1.1         | 1.8          |
| <b>Fats, oils, gravy</b>                        | <b>0.1</b>        | <b>0.4</b>   | <b>0.1</b>  | <b>0.1</b>   | <b>0.2</b>  | <b>0.3</b>   |
| <b>Fish, fish dishes</b>                        | <b>1.6</b>        | <b>5.7</b>   | <b>2.7</b>  | <b>7.9</b>   | <b>4.4</b>  | <b>6.9</b>   |
| <b>Eggs, egg dishes</b>                         | <b>0.3</b>        | <b>1.1</b>   | <b>0.2</b>  | <b>0.7</b>   | <b>0.6</b>  | <b>0.9</b>   |
| <b>Meat, meat dishes</b>                        | <b>9.0</b>        | <b>31.3</b>  | <b>8.1</b>  | <b>23.3</b>  | <b>17.1</b> | <b>26.9</b>  |
| cold cuts                                       | 0.6               | 2.0          | 0.7         | 2.0          | 1.3         | 2.0          |
| red meat dishes                                 | 5.5               | 19.1         | 4.4         | 12.5         | 9.8         | 15.5         |
| poultry dishes                                  | 2.3               | 7.9          | 2.2         | 6.3          | 4.5         | 7.0          |
| sausage dishes                                  | 0.6               | 2.2          | 0.7         | 2.0          | 1.3         | 2.1          |
| <b>Milk, dairy products</b>                     | <b>9.7</b>        | <b>33.8</b>  | <b>13.4</b> | <b>38.5</b>  | <b>23.2</b> | <b>36.4</b>  |
| skimmed milk                                    | 3.2               | 11.0         | 8.9         | 25.4         | 12.0        | 18.9         |
| milk with 1-1.5% fat content                    | 2.1               | 7.1          | 2.1         | 6.0          | 4.1         | 6.5          |
| yoghurt and Finnish cultured milk               | 1.4               | 4.9          | 0.3         | 0.8          | 1.7         | 2.7          |
| cheese                                          | 1.7               | 5.9          | 1.0         | 2.8          | 2.7         | 4.2          |
| dairy-based desserts                            | 0.5               | 1.8          | 0.8         | 2.2          | 1.3         | 2.0          |
| <b>Sugar, sweets</b>                            | <b>0.3</b>        | <b>0.9</b>   | <b>0.0</b>  | <b>0.1</b>   | <b>0.3</b>  | <b>0.5</b>   |
| <b>Drinks</b>                                   | <b>0.1</b>        | <b>0.5</b>   | <b>0.1</b>  | <b>0.2</b>   | <b>0.2</b>  | <b>0.3</b>   |
| <b>Miscellaneous</b>                            | <b>0.4</b>        | <b>1.3</b>   | <b>0.1</b>  | <b>0.3</b>   | <b>0.5</b>  | <b>0.8</b>   |
| <b>Total</b>                                    | <b>28.8</b>       | <b>100.0</b> | <b>34.9</b> | <b>100.0</b> | <b>63.7</b> | <b>100.0</b> |

Table S 7: Sources of carbohydrates (mean and population proportion) in the diet on weekdays among Finnish 3- to 4-year-old preschool children who eat three meals at preschool. Main food groups and selected food groups are presented.

|                                                 | Outside preschool |              | Preschool   |              | Total        |              |
|-------------------------------------------------|-------------------|--------------|-------------|--------------|--------------|--------------|
|                                                 | g/day             | %            | g/day       | %            | g/day        | %            |
| <b>Vegetables, vegetable dishes</b>             | <b>2.8</b>        | <b>4.0</b>   | <b>3.3</b>  | <b>3.7</b>   | <b>6.1</b>   | <b>3.9</b>   |
| <b>Potatoes, potato dishes</b>                  | <b>3.2</b>        | <b>4.5</b>   | <b>6.1</b>  | <b>6.9</b>   | <b>9.3</b>   | <b>5.8</b>   |
| <b>Fruit, berries, fruit and berry products</b> | <b>10.3</b>       | <b>14.4</b>  | <b>10.1</b> | <b>11.6</b>  | <b>20.5</b>  | <b>12.9</b>  |
| fresh fruit                                     | 7.3               | 10.3         | 3.0         | 3.4          | 10.3         | 6.5          |
| fruit and berry soups                           | 0.4               | 0.6          | 4.0         | 4.6          | 4.4          | 2.8          |
| 100% juice                                      | 0.8               | 1.2          | 0.7         | 0.8          | 1.6          | 1.0          |
| <b>Cereals, bakery products</b>                 | <b>26.2</b>       | <b>36.7</b>  | <b>36.1</b> | <b>41.1</b>  | <b>62.2</b>  | <b>39.1</b>  |
| rye bread                                       | 2.8               | 4.0          | 4.8         | 5.5          | 7.7          | 4.8          |
| rye crispbread                                  | 0.7               | 1.0          | 4.8         | 5.5          | 5.6          | 3.5          |
| multi-grain bread                               | 4.1               | 5.7          | 9.0         | 10.3         | 13.1         | 8.2          |
| white bread                                     | 1.3               | 1.9          | 1.4         | 1.6          | 2.7          | 1.7          |
| porridge                                        | 3.2               | 4.5          | 9.8         | 11.2         | 13.0         | 8.2          |
| rice, pasta, etc.                               | 4.6               | 6.4          | 2.0         | 2.3          | 6.6          | 4.1          |
| <b>Fats, oils, gravy</b>                        | <b>0.1</b>        | <b>0.2</b>   | <b>0.5</b>  | <b>0.6</b>   | <b>0.6</b>   | <b>0.4</b>   |
| <b>Fish, fish dishes</b>                        | <b>0.8</b>        | <b>1.1</b>   | <b>2.7</b>  | <b>3.0</b>   | <b>3.5</b>   | <b>2.2</b>   |
| <b>Eggs, egg dishes</b>                         | <b>0.0</b>        | <b>0.0</b>   | <b>0.0</b>  | <b>0.0</b>   | <b>0.0</b>   | <b>0.0</b>   |
| <b>Meat, meat dishes</b>                        | <b>4.8</b>        | <b>6.8</b>   | <b>8.1</b>  | <b>9.3</b>   | <b>13.0</b>  | <b>8.2</b>   |
| <b>Milk, dairy products</b>                     | <b>14.8</b>       | <b>20.7</b>  | <b>18.5</b> | <b>21.1</b>  | <b>33.3</b>  | <b>20.9</b>  |
| skimmed milk                                    | 3.8               | 5.3          | 12.8        | 14.6         | 16.6         | 10.4         |
| milk with 1-1.5% fat content                    | 3.8               | 5.3          | 2.4         | 2.7          | 6.2          | 3.9          |
| yoghurt and Finnish cultured milk               | 4.1               | 5.7          | 1.0         | 1.2          | 5.1          | 3.2          |
| <b>Sugar, sweets</b>                            | <b>2.7</b>        | <b>3.8</b>   | <b>0.4</b>  | <b>0.4</b>   | <b>3.1</b>   | <b>1.9</b>   |
| <b>Drinks</b>                                   | <b>3.8</b>        | <b>5.3</b>   | <b>1.4</b>  | <b>1.6</b>   | <b>5.2</b>   | <b>3.3</b>   |
| <b>Miscellaneous</b>                            | <b>1.8</b>        | <b>2.5</b>   | <b>0.6</b>  | <b>0.7</b>   | <b>2.3</b>   | <b>1.5</b>   |
| <b>Total</b>                                    | <b>71.4</b>       | <b>100.0</b> | <b>87.7</b> | <b>100.0</b> | <b>159.1</b> | <b>100.0</b> |

Table S 8: Sources of carbohydrates (mean and population proportion) in the diet on weekdays among Finnish 5- to 6-year-old preschool children who eat three meals at preschool. Main food groups and selected food groups are presented.

|                                                 | Outside preschool |              | Preschool   |              | Total        |              |
|-------------------------------------------------|-------------------|--------------|-------------|--------------|--------------|--------------|
|                                                 | g/day             | %            | g/day       | %            | g/day        | %            |
| <b>Vegetables, vegetable dishes</b>             | <b>3.0</b>        | <b>3.6</b>   | <b>4.0</b>  | <b>4.1</b>   | <b>7.0</b>   | <b>3.8</b>   |
| <b>Potatoes, potato dishes</b>                  | <b>4.2</b>        | <b>5.1</b>   | <b>7.2</b>  | <b>7.3</b>   | <b>11.4</b>  | <b>6.3</b>   |
| <b>Fruit, berries, fruit and berry products</b> | <b>11.9</b>       | <b>14.3</b>  | <b>10.3</b> | <b>10.4</b>  | <b>22.2</b>  | <b>12.2</b>  |
| fresh fruit                                     | 7.0               | 8.5          | 3.2         | 3.2          | 10.3         | 5.6          |
| fruit and berry soups                           | 0.9               | 1.1          | 3.4         | 3.4          | 4.3          | 2.4          |
| 100% juice                                      | 1.2               | 1.5          | 0.9         | 0.9          | 2.1          | 1.2          |
| <b>Cereals, bakery products</b>                 | <b>28.5</b>       | <b>34.3</b>  | <b>41.2</b> | <b>41.5</b>  | <b>69.7</b>  | <b>38.2</b>  |
| rye bread                                       | 3.3               | 4.0          | 4.3         | 4.3          | 7.6          | 4.2          |
| rye crispbread                                  | 0.5               | 0.7          | 5.3         | 5.3          | 5.8          | 3.2          |
| multi-grain bread                               | 4.9               | 5.9          | 9.3         | 9.4          | 14.2         | 7.8          |
| white bread                                     | 1.7               | 2.1          | 2.6         | 2.6          | 4.3          | 2.3          |
| porridge                                        | 3.3               | 3.9          | 11.8        | 11.9         | 15.1         | 8.3          |
| rice, pasta, etc.                               | 4.8               | 5.8          | 2.4         | 2.4          | 7.3          | 4.0          |
| <b>Fats, oils, gravy</b>                        | <b>0.2</b>        | <b>0.2</b>   | <b>0.6</b>  | <b>0.6</b>   | <b>0.8</b>   | <b>0.4</b>   |
| <b>Fish, fish dishes</b>                        | <b>1.1</b>        | <b>1.3</b>   | <b>2.6</b>  | <b>2.6</b>   | <b>3.7</b>   | <b>2.0</b>   |
| <b>Eggs, egg dishes</b>                         | <b>0.0</b>        | <b>0.0</b>   | <b>0.0</b>  | <b>0.0</b>   | <b>0.0</b>   | <b>0.0</b>   |
| <b>Meat, meat dishes</b>                        | <b>5.5</b>        | <b>6.6</b>   | <b>9.5</b>  | <b>9.6</b>   | <b>15.0</b>  | <b>8.2</b>   |
| <b>Milk, dairy products</b>                     | <b>16.4</b>       | <b>19.8</b>  | <b>20.7</b> | <b>20.8</b>  | <b>37.1</b>  | <b>20.3</b>  |
| skimmed milk                                    | 4.7               | 5.7          | 13.7        | 13.8         | 18.4         | 10.1         |
| milk with 1-1.5% fat content                    | 3.1               | 3.7          | 3.0         | 3.0          | 6.0          | 3.3          |
| yoghurt and Finnish cultured milk               | 4.8               | 5.7          | 0.8         | 0.8          | 5.6          | 3.1          |
| <b>Sugar, sweets</b>                            | <b>5.9</b>        | <b>7.1</b>   | <b>1.0</b>  | <b>1.0</b>   | <b>6.9</b>   | <b>3.8</b>   |
| <b>Drinks</b>                                   | <b>4.4</b>        | <b>5.3</b>   | <b>1.4</b>  | <b>1.4</b>   | <b>5.8</b>   | <b>3.2</b>   |
| <b>Miscellaneous</b>                            | <b>2.1</b>        | <b>2.5</b>   | <b>0.7</b>  | <b>0.7</b>   | <b>2.8</b>   | <b>1.5</b>   |
| <b>Total</b>                                    | <b>83.2</b>       | <b>100.0</b> | <b>99.3</b> | <b>100.0</b> | <b>182.4</b> | <b>100.0</b> |



Table S 9: Sources of sucrose (mean and population proportion) in the diet on weekdays among Finnish 3- to 4-year-old preschool children who eat three meals at preschool. Main food groups and selected food groups are presented.

|                                                 | Outside preschool |              | Preschool   |              | Total       |              |
|-------------------------------------------------|-------------------|--------------|-------------|--------------|-------------|--------------|
|                                                 | g/day             | %            | g/day       | %            | g/day       | %            |
| <b>Vegetables, vegetable dishes</b>             | <b>0.4</b>        | <b>2.6</b>   | <b>0.6</b>  | <b>5.9</b>   | <b>1.1</b>  | <b>3.9</b>   |
| <b>Potatoes, potato dishes</b>                  | <b>0.0</b>        | <b>0.0</b>   | <b>0.0</b>  | <b>0.1</b>   | <b>0.0</b>  | <b>0.1</b>   |
| <b>Fruit, berries, fruit and berry products</b> | <b>3.5</b>        | <b>21.9</b>  | <b>5.0</b>  | <b>45.7</b>  | <b>8.5</b>  | <b>31.6</b>  |
| fresh fruit                                     | 2.2               | 13.8         | 0.9         | 8.6          | 3.1         | 11.7         |
| berries                                         | 0.1               | 0.8          | 0.0         | 0.1          | 0.1         | 0.5          |
| fruit and berry soups                           | 0.2               | 1.3          | 2.5         | 23.2         | 2.8         | 10.3         |
| berry and fruit pies                            | 0.0               | 0.3          | 0.0         | 0.0          | 0.0         | 0.2          |
| jams, marmalades                                | 0.4               | 2.7          | 0.8         | 7.3          | 1.2         | 4.6          |
| 100% juice                                      | 0.2               | 1.4          | 0.2         | 1.6          | 0.4         | 1.5          |
| smoothies                                       | 0.1               | 0.8          | 0.3         | 2.5          | 0.4         | 1.5          |
| <b>Cereals, bakery products</b>                 | <b>2.8</b>        | <b>17.7</b>  | <b>1.7</b>  | <b>15.1</b>  | <b>4.5</b>  | <b>16.6</b>  |
| breakfast cereals                               | 0.5               | 3.4          | 0.2         | 1.4          | 0.7         | 2.6          |
| buns, sweet bakery                              | 0.8               | 4.8          | 0.1         | 1.0          | 0.9         | 3.2          |
| biscuits and mslibars                           | 0.8               | 5.1          | 0.2         | 1.4          | 1.0         | 3.6          |
| pancakes, crpes                                 | 0.1               | 0.4          | 0.1         | 0.7          | 0.1         | 0.6          |
| <b>Fats, oils, gravy</b>                        | <b>0.0</b>        | <b>0.1</b>   | <b>0.1</b>  | <b>0.6</b>   | <b>0.1</b>  | <b>0.3</b>   |
| <b>Fish, fish dishes</b>                        | <b>0.0</b>        | <b>0.1</b>   | <b>0.0</b>  | <b>0.3</b>   | <b>0.1</b>  | <b>0.2</b>   |
| <b>Eggs, egg dishes</b>                         | <b>0.0</b>        | <b>0.0</b>   | <b>0.0</b>  | <b>0.0</b>   | <b>0.0</b>  | <b>0.0</b>   |
| <b>Meat, meat dishes</b>                        | <b>0.2</b>        | <b>1.3</b>   | <b>0.3</b>  | <b>3.0</b>   | <b>0.5</b>  | <b>2.0</b>   |
| <b>Milk, dairy products</b>                     | <b>3.9</b>        | <b>24.4</b>  | <b>1.7</b>  | <b>16.0</b>  | <b>5.6</b>  | <b>21.0</b>  |
| sweetened milk drinks (cocoa etc.)              | 0.4               | 2.5          | 0.1         | 0.8          | 0.5         | 1.8          |
| yoghurt and Finnish cultured milk               | 2.4               | 15.2         | 0.6         | 5.2          | 3.0         | 11.1         |
| dairy-based desserts                            | 0.5               | 3.0          | 1.0         | 8.9          | 1.5         | 5.4          |
| ice-cream                                       | 0.6               | 3.5          | 0.1         | 0.9          | 0.7         | 2.5          |
| <b>Sugar, sweets</b>                            | <b>1.5</b>        | <b>9.4</b>   | <b>0.3</b>  | <b>2.6</b>   | <b>1.8</b>  | <b>6.6</b>   |
| sugar, honey                                    | 0.2               | 1.1          | 0.2         | 1.7          | 0.4         | 1.4          |
| sweets                                          | 0.6               | 3.9          | 0.1         | 0.6          | 0.7         | 2.6          |
| chocolate                                       | 0.7               | 4.4          | 0.0         | 0.3          | 0.7         | 2.7          |
| <b>Drinks</b>                                   | <b>3.1</b>        | <b>19.4</b>  | <b>1.0</b>  | <b>8.8</b>   | <b>4.0</b>  | <b>15.1</b>  |
| sugar-sweetened juice                           | 2.1               | 13.5         | 0.5         | 4.6          | 2.6         | 9.9          |
| sugar-sweetened soda                            | 0.3               | 2.1          |             | 0.0          | 0.3         | 1.2          |
| non-dairy milk substitutes                      | 0.4               | 2.2          | 0.4         | 4.1          | 0.8         | 3.0          |
| <b>Miscellaneous</b>                            | <b>0.5</b>        | <b>3.1</b>   | <b>0.2</b>  | <b>2.0</b>   | <b>0.7</b>  | <b>2.7</b>   |
| <b>Total</b>                                    | <b>15.9</b>       | <b>100.0</b> | <b>10.9</b> | <b>100.0</b> | <b>26.8</b> | <b>100.0</b> |

Table S 10: Sources of sucrose (mean and population proportion) in the diet on weekdays among Finnish 5- to 6-year-old preschool children who eat three meals at preschool. Main food groups and selected food groups are presented.

|                                                 | Outside preschool |              | Preschool   |              | Total       |              |
|-------------------------------------------------|-------------------|--------------|-------------|--------------|-------------|--------------|
|                                                 | g/day             | %            | g/day       | %            | g/day       | %            |
| <b>Vegetables, vegetable dishes</b>             | <b>0.4</b>        | <b>2.3</b>   | <b>0.8</b>  | <b>6.5</b>   | <b>1.3</b>  | <b>3.9</b>   |
| <b>Potatoes, potato dishes</b>                  | <b>0.0</b>        | <b>0.0</b>   | <b>0.0</b>  | <b>0.1</b>   | <b>0.0</b>  | <b>0.1</b>   |
| <b>Fruit, berries, fruit and berry products</b> | <b>4.3</b>        | <b>22.0</b>  | <b>5.2</b>  | <b>40.7</b>  | <b>9.4</b>  | <b>29.3</b>  |
| fresh fruit                                     | 2.2               | 11.5         | 1.0         | 7.9          | 3.2         | 10.1         |
| berries                                         | 0.1               | 0.5          | 0.0         | 0.1          | 0.1         | 0.4          |
| fruit and berry soups                           | 0.5               | 2.4          | 2.2         | 17.1         | 2.6         | 8.2          |
| berry and fruit pies                            | 0.2               | 0.9          | 0.0         | 0.1          | 0.2         | 0.6          |
| jams, marmalades                                | 0.5               | 2.6          | 1.2         | 9.6          | 1.7         | 5.3          |
| 100% juice                                      | 0.3               | 1.8          | 0.2         | 1.9          | 0.6         | 1.8          |
| smoothies                                       | 0.2               | 1.1          | 0.2         | 1.4          | 0.4         | 1.2          |
| <b>Cereals, bakery products</b>                 | <b>2.6</b>        | <b>13.6</b>  | <b>2.2</b>  | <b>17.2</b>  | <b>4.8</b>  | <b>15.0</b>  |
| breakfast cereals                               | 0.8               | 3.9          | 0.2         | 1.3          | 0.9         | 2.9          |
| buns, sweet bakery                              | 0.5               | 2.8          | 0.2         | 1.5          | 0.7         | 2.3          |
| biscuits and mslibars                           | 0.7               | 3.6          | 0.3         | 2.7          | 1.0         | 3.2          |
| pancakes, crpes                                 | 0.0               | 0.2          | 0.1         | 0.8          | 0.1         | 0.4          |
| <b>Fats, oils, gravy</b>                        | <b>0.0</b>        | <b>0.1</b>   | <b>0.1</b>  | <b>0.6</b>   | <b>0.1</b>  | <b>0.3</b>   |
| <b>Fish, fish dishes</b>                        | <b>0.0</b>        | <b>0.2</b>   | <b>0.0</b>  | <b>0.3</b>   | <b>0.1</b>  | <b>0.2</b>   |
| <b>Eggs, egg dishes</b>                         | <b>0.0</b>        | <b>0.0</b>   | <b>0.0</b>  | <b>0.0</b>   | <b>0.0</b>  | <b>0.0</b>   |
| <b>Meat, meat dishes</b>                        | <b>0.2</b>        | <b>1.1</b>   | <b>0.4</b>  | <b>3.0</b>   | <b>0.6</b>  | <b>1.8</b>   |
| <b>Milk, dairy products</b>                     | <b>4.5</b>        | <b>23.2</b>  | <b>2.0</b>  | <b>16.1</b>  | <b>6.6</b>  | <b>20.4</b>  |
| sweetened milk drinks (cocoa etc.)              | 0.3               | 1.8          | 0.2         | 1.2          | 0.5         | 1.6          |
| yoghurt and Finnish cultured milk               | 2.8               | 14.2         | 0.4         | 2.8          | 3.1         | 9.7          |
| dairy-based desserts                            | 0.7               | 3.8          | 1.3         | 10.3         | 2.0         | 6.4          |
| ice-cream                                       | 0.6               | 3.3          | 0.2         | 1.6          | 0.9         | 2.6          |
| <b>Sugar, sweets</b>                            | <b>3.1</b>        | <b>15.8</b>  | <b>0.7</b>  | <b>5.6</b>   | <b>3.8</b>  | <b>11.8</b>  |
| sugar, honey                                    | 0.2               | 1.2          | 0.4         | 2.9          | 0.6         | 1.9          |
| sweets                                          | 1.9               | 9.8          | 0.2         | 1.6          | 2.1         | 6.6          |
| chocolate                                       | 0.9               | 4.7          | 0.1         | 1.1          | 1.1         | 3.3          |
| <b>Drinks</b>                                   | <b>3.8</b>        | <b>19.7</b>  | <b>1.1</b>  | <b>8.5</b>   | <b>4.9</b>  | <b>15.3</b>  |
| sugar-sweetened juice                           | 2.8               | 14.3         | 0.9         | 7.1          | 3.7         | 11.5         |
| sugar-sweetened soda                            | 0.8               | 4.0          |             | 0.0          | 0.8         | 2.5          |
| non-dairy milk substitutes                      | 0.2               | 1.3          | 0.2         | 1.4          | 0.4         | 1.3          |
| <b>Miscellaneous</b>                            | <b>0.4</b>        | <b>2.2</b>   | <b>0.2</b>  | <b>1.5</b>   | <b>0.6</b>  | <b>1.9</b>   |
| <b>Total</b>                                    | <b>19.5</b>       | <b>100.0</b> | <b>12.7</b> | <b>100.0</b> | <b>32.1</b> | <b>100.0</b> |

Table S 11: Sources of added sugar (mean and population proportion) in the diet on weekdays among Finnish 3- to 4-year-old preschool children who eat three meals at preschool. Main food groups and selected food groups are presented.

|                                                 | Outside preschool |              | Preschool  |              | Total       |              |
|-------------------------------------------------|-------------------|--------------|------------|--------------|-------------|--------------|
|                                                 | g/day             | %            | g/day      | %            | g/day       | %            |
| <b>Vegetables, vegetable dishes</b>             | <b>0.0</b>        | <b>0.0</b>   | <b>0.0</b> | <b>0.0</b>   | <b>0.0</b>  | <b>0.0</b>   |
| <b>Potatoes, potato dishes</b>                  | <b>0.0</b>        | <b>0.0</b>   | <b>0.0</b> | <b>0.0</b>   | <b>0.0</b>  | <b>0.0</b>   |
| <b>Fruit, berries, fruit and berry products</b> | <b>0.8</b>        | <b>6.4</b>   | <b>3.9</b> | <b>47.7</b>  | <b>4.7</b>  | <b>22.5</b>  |
| fruit and berry soups                           | 0.2               | 1.8          | 2.8        | 34.4         | 3.0         | 14.5         |
| berry and fruit pies                            | 0.0               | 0.4          | 0.0        | 0.0          | 0.1         | 0.2          |
| jams, marmalades                                | 0.4               | 3.3          | 0.9        | 10.5         | 1.3         | 6.1          |
| <b>Cereals, bakery products</b>                 | <b>2.7</b>        | <b>21.6</b>  | <b>1.4</b> | <b>17.5</b>  | <b>4.2</b>  | <b>20.0</b>  |
| breakfast cereals                               | 0.6               | 4.5          | 0.1        | 1.4          | 0.7         | 3.3          |
| buns, sweet bakery                              | 0.8               | 6.0          | 0.1        | 1.3          | 0.9         | 4.2          |
| biscuits and mslibars                           | 0.8               | 6.4          | 0.2        | 1.9          | 1.0         | 4.6          |
| pancakes, crpes                                 | 0.1               | 0.5          | 0.1        | 1.0          | 0.1         | 0.7          |
| <b>Fats, oils, gravy</b>                        | <b>0.0</b>        | <b>0.1</b>   | <b>0.1</b> | <b>0.8</b>   | <b>0.1</b>  | <b>0.3</b>   |
| <b>Fish, fish dishes</b>                        | <b>0.0</b>        | <b>0.0</b>   | <b>0.0</b> | <b>0.0</b>   | <b>0.0</b>  | <b>0.0</b>   |
| <b>Eggs, egg dishes</b>                         | <b>0.0</b>        | <b>0.0</b>   | <b>0.0</b> | <b>0.0</b>   | <b>0.0</b>  | <b>0.0</b>   |
| <b>Meat, meat dishes</b>                        | <b>0.0</b>        | <b>0.0</b>   | <b>0.0</b> | <b>0.0</b>   | <b>0.0</b>  | <b>0.0</b>   |
| <b>Milk, dairy products</b>                     | <b>3.9</b>        | <b>30.6</b>  | <b>1.7</b> | <b>20.9</b>  | <b>5.6</b>  | <b>26.8</b>  |
| sweetened milk drinks (cocoa etc.)              | 0.4               | 3.1          | 0.1        | 1.1          | 0.5         | 2.3          |
| yoghurt and Finnish cultured milk               | 2.4               | 19.0         | 0.5        | 5.8          | 2.9         | 13.9         |
| dairy-based desserts                            | 0.5               | 4.0          | 1.0        | 12.8         | 1.5         | 7.4          |
| ice-cream                                       | 0.6               | 4.4          | 0.1        | 1.2          | 0.7         | 3.2          |
| <b>Sugar, sweets</b>                            | <b>2.1</b>        | <b>16.4</b>  | <b>0.3</b> | <b>4.0</b>   | <b>2.4</b>  | <b>11.5</b>  |
| sugar, honey                                    | 0.4               | 3.5          | 0.2        | 2.5          | 0.6         | 3.1          |
| sweets                                          | 0.9               | 7.0          | 0.1        | 1.2          | 1.0         | 4.7          |
| chocolate                                       | 0.7               | 5.9          | 0.0        | 0.3          | 0.8         | 3.7          |
| <b>Drinks</b>                                   | <b>2.7</b>        | <b>21.4</b>  | <b>0.5</b> | <b>6.4</b>   | <b>3.2</b>  | <b>15.6</b>  |
| sugar-sweetened juice                           | 2.2               | 17.5         | 0.5        | 6.0          | 2.7         | 13.0         |
| sugar-sweetened soda                            | 0.4               | 2.8          | 0.0        | 0.0          | 0.4         | 1.7          |
| non-dairy milk substitutes                      | 0.0               | 0.2          | 0.0        | 0.4          | 0.1         | 0.3          |
| <b>Miscellaneous</b>                            | <b>0.5</b>        | <b>3.6</b>   | <b>0.2</b> | <b>2.7</b>   | <b>0.7</b>  | <b>3.2</b>   |
| <b>Total</b>                                    | <b>12.7</b>       | <b>100.0</b> | <b>8.1</b> | <b>100.0</b> | <b>20.8</b> | <b>100.0</b> |

Table S 12: Sources of added sugar (mean and population proportion) in the diet on weekdays among Finnish 5- to 6-year-old preschool children who eat three meals at preschool. Main food groups and selected food groups are presented.

|                                                 | Outside preschool |              | Preschool  |              | Total       |              |
|-------------------------------------------------|-------------------|--------------|------------|--------------|-------------|--------------|
|                                                 | g/day             | %            | g/day      | %            | g/day       | %            |
| <b>Vegetables, vegetable dishes</b>             | <b>0.0</b>        | <b>0.0</b>   | <b>0.0</b> | <b>0.0</b>   | <b>0.0</b>  | <b>0.0</b>   |
| <b>Potatoes, potato dishes</b>                  | <b>0.0</b>        | <b>0.0</b>   | <b>0.0</b> | <b>0.0</b>   | <b>0.0</b>  | <b>0.0</b>   |
| <b>Fruit, berries, fruit and berry products</b> | <b>1.3</b>        | <b>8.0</b>   | <b>3.8</b> | <b>39.2</b>  | <b>5.2</b>  | <b>19.5</b>  |
| fruit and berry soups                           | 0.5               | 3.1          | 2.3        | 23.8         | 2.9         | 10.7         |
| berry and fruit pies                            | 0.2               | 1.1          | 0.0        | 0.2          | 0.2         | 0.7          |
| jams, marmalades                                | 0.5               | 3.0          | 1.2        | 12.6         | 1.7         | 6.6          |
| <b>Cereals, bakery products</b>                 | <b>2.5</b>        | <b>14.8</b>  | <b>1.9</b> | <b>19.6</b>  | <b>4.4</b>  | <b>16.6</b>  |
| breakfast cereals                               | 0.7               | 4.4          | 0.1        | 1.2          | 0.9         | 3.3          |
| buns, sweet bakery                              | 0.5               | 3.3          | 0.2        | 2.0          | 0.7         | 2.8          |
| biscuits and mslibars                           | 0.7               | 4.2          | 0.3        | 3.4          | 1.0         | 3.9          |
| pancakes, crpes                                 | 0.0               | 0.2          | 0.1        | 1.1          | 0.1         | 0.5          |
| <b>Fats, oils, gravy</b>                        | <b>0.0</b>        | <b>0.1</b>   | <b>0.1</b> | <b>0.7</b>   | <b>0.1</b>  | <b>0.3</b>   |
| <b>Fish, fish dishes</b>                        | <b>0.0</b>        | <b>0.0</b>   | <b>0.0</b> | <b>0.0</b>   | <b>0.0</b>  | <b>0.0</b>   |
| <b>Eggs, egg dishes</b>                         | <b>0.0</b>        | <b>0.0</b>   | <b>0.0</b> | <b>0.0</b>   | <b>0.0</b>  | <b>0.0</b>   |
| <b>Meat, meat dishes</b>                        | <b>0.0</b>        | <b>0.0</b>   | <b>0.0</b> | <b>0.0</b>   | <b>0.0</b>  | <b>0.0</b>   |
| <b>Milk, dairy products</b>                     | <b>4.5</b>        | <b>27.1</b>  | <b>2.1</b> | <b>21.3</b>  | <b>6.6</b>  | <b>24.9</b>  |
| sweetened milk drinks (cocoa etc.)              | 0.3               | 2.1          | 0.2        | 1.6          | 0.5         | 1.9          |
| yoghurt and Finnish cultured milk               | 2.8               | 16.5         | 0.4        | 3.6          | 3.1         | 11.8         |
| dairy-based desserts                            | 0.8               | 4.6          | 1.4        | 13.9         | 2.1         | 8.1          |
| ice-cream                                       | 0.7               | 3.9          | 0.2        | 2.1          | 0.9         | 3.2          |
| <b>Sugar, sweets</b>                            | <b>4.3</b>        | <b>25.8</b>  | <b>0.8</b> | <b>8.4</b>   | <b>5.2</b>  | <b>19.4</b>  |
| sugar, honey                                    | 0.5               | 3.1          | 0.4        | 3.9          | 0.9         | 3.4          |
| sweets                                          | 2.8               | 16.8         | 0.3        | 3.0          | 3.1         | 11.7         |
| chocolate                                       | 1.0               | 5.9          | 0.1        | 1.5          | 1.1         | 4.3          |
| <b>Drinks</b>                                   | <b>3.7</b>        | <b>21.9</b>  | <b>0.9</b> | <b>9.0</b>   | <b>4.6</b>  | <b>17.2</b>  |
| sugar-sweetened juice                           | 2.8               | 17.0         | 0.9        | 8.9          | 3.7         | 14.0         |
| sugar-sweetened soda                            | 0.8               | 4.9          | 0.0        | 0.0          | 0.8         | 3.1          |
| non-dairy milk substitutes                      | 0.0               | 0.1          | 0.0        | 0.1          | 0.0         | 0.1          |
| <b>Miscellaneous</b>                            | <b>0.4</b>        | <b>2.2</b>   | <b>0.2</b> | <b>1.8</b>   | <b>0.6</b>  | <b>2.1</b>   |
| <b>Total</b>                                    | <b>16.8</b>       | <b>100.0</b> | <b>9.8</b> | <b>100.0</b> | <b>26.6</b> | <b>100.0</b> |

Table S 13: Sources of fiber (mean and population proportion) in the diet on weekdays among Finnish 3- to 4-year-old preschool children who eat three meals at preschool. Main food groups and selected food groups are presented.

|                                                 | Outside preschool |              | Preschool  |              | Total       |              |
|-------------------------------------------------|-------------------|--------------|------------|--------------|-------------|--------------|
|                                                 | g/day             | %            | g/day      | %            | g/day       | %            |
| <b>Vegetables, vegetable dishes</b>             | <b>0.8</b>        | <b>13.2</b>  | <b>0.8</b> | <b>8.6</b>   | <b>1.6</b>  | <b>10.5</b>  |
| <b>Potatoes, potato dishes</b>                  | <b>0.2</b>        | <b>3.0</b>   | <b>0.4</b> | <b>4.6</b>   | <b>0.6</b>  | <b>4.0</b>   |
| <b>Fruit, berries, fruit and berry products</b> | <b>1.5</b>        | <b>24.7</b>  | <b>0.9</b> | <b>10.0</b>  | <b>2.4</b>  | <b>15.9</b>  |
| fresh fruit                                     | 1.2               | 20.3         | 0.5        | 5.8          | 1.8         | 11.6         |
| fruit and berry soups                           | 0.0               | 0.4          | 0.2        | 1.9          | 0.2         | 1.3          |
| <b>Cereals, bakery products</b>                 | <b>2.6</b>        | <b>42.7</b>  | <b>5.9</b> | <b>64.5</b>  | <b>8.5</b>  | <b>55.8</b>  |
| rye bread                                       | 0.6               | 10.1         | 1.0        | 11.1         | 1.6         | 10.7         |
| rye crispbread                                  | 0.2               | 3.9          | 1.9        | 20.9         | 2.2         | 14.1         |
| multi-grain bread                               | 0.5               | 7.8          | 1.0        | 11.4         | 1.5         | 9.9          |
| white bread                                     | 0.1               | 1.3          | 0.1        | 0.8          | 0.2         | 1.0          |
| porridge                                        | 0.4               | 5.8          | 1.5        | 16.0         | 1.8         | 11.9         |
| rice, pasta, etc.                               | 0.2               | 4.1          | 0.2        | 1.8          | 0.4         | 2.7          |
| <b>Fats, oils, gravy</b>                        | <b>0.0</b>        | <b>0.0</b>   | <b>0.0</b> | <b>0.1</b>   | <b>0.0</b>  | <b>0.1</b>   |
| <b>Fish, fish dishes</b>                        | <b>0.1</b>        | <b>1.0</b>   | <b>0.2</b> | <b>2.1</b>   | <b>0.3</b>  | <b>1.7</b>   |
| <b>Eggs, egg dishes</b>                         | <b>0.0</b>        | <b>0.0</b>   | <b>0.0</b> | <b>0.0</b>   | <b>0.0</b>  | <b>0.0</b>   |
| <b>Meat, meat dishes</b>                        | <b>0.4</b>        | <b>6.9</b>   | <b>0.7</b> | <b>7.4</b>   | <b>1.1</b>  | <b>7.2</b>   |
| <b>Milk, dairy products</b>                     | <b>0.1</b>        | <b>1.8</b>   | <b>0.1</b> | <b>1.2</b>   | <b>0.2</b>  | <b>1.4</b>   |
| <b>Sugar, sweets</b>                            | <b>0.0</b>        | <b>0.6</b>   | <b>0.0</b> | <b>0.0</b>   | <b>0.0</b>  | <b>0.2</b>   |
| <b>Drinks</b>                                   | <b>0.1</b>        | <b>2.1</b>   | <b>0.1</b> | <b>0.8</b>   | <b>0.2</b>  | <b>1.3</b>   |
| <b>Miscellaneous</b>                            | <b>0.2</b>        | <b>3.9</b>   | <b>0.1</b> | <b>0.6</b>   | <b>0.3</b>  | <b>1.9</b>   |
| <b>Total</b>                                    | <b>6.1</b>        | <b>100.0</b> | <b>9.1</b> | <b>100.0</b> | <b>15.3</b> | <b>100.0</b> |

Table S 14: Sources of fiber (mean and population proportion) in the diet on weekdays among Finnish 5- to 6-year-old preschool children who eat three meals at preschool. Main food groups and selected food groups are presented.

|                                                 | Outside preschool |              | Preschool   |              | Total       |              |
|-------------------------------------------------|-------------------|--------------|-------------|--------------|-------------|--------------|
|                                                 | g/day             | %            | g/day       | %            | g/day       | %            |
| <b>Vegetables, vegetable dishes</b>             | <b>0.8</b>        | <b>11.6</b>  | <b>1.0</b>  | <b>9.6</b>   | <b>1.7</b>  | <b>10.4</b>  |
| <b>Potatoes, potato dishes</b>                  | <b>0.2</b>        | <b>3.1</b>   | <b>0.5</b>  | <b>5.0</b>   | <b>0.7</b>  | <b>4.3</b>   |
| <b>Fruit, berries, fruit and berry products</b> | <b>1.7</b>        | <b>25.7</b>  | <b>0.9</b>  | <b>9.2</b>   | <b>2.6</b>  | <b>15.7</b>  |
| fresh fruit                                     | 1.2               | 18.0         | 0.5         | 5.4          | 1.7         | 10.4         |
| fruit and berry soups                           | 0.1               | 1.0          | 0.1         | 1.3          | 0.2         | 1.2          |
| <b>Cereals, bakery products</b>                 | <b>2.8</b>        | <b>42.8</b>  | <b>6.4</b>  | <b>63.4</b>  | <b>9.2</b>  | <b>55.3</b>  |
| rye bread                                       | 0.7               | 10.4         | 0.9         | 9.1          | 1.6         | 9.6          |
| rye crispbread                                  | 0.2               | 2.4          | 2.1         | 20.9         | 2.3         | 13.6         |
| multi-grain bread                               | 0.6               | 8.7          | 1.1         | 10.7         | 1.7         | 9.9          |
| white bread                                     | 0.1               | 1.7          | 0.1         | 1.3          | 0.2         | 1.5          |
| porridge                                        | 0.4               | 5.8          | 1.6         | 16.2         | 2.0         | 12.1         |
| rice, pasta, etc.                               | 0.3               | 4.6          | 0.2         | 2.1          | 0.5         | 3.1          |
| <b>Fats, oils, gravy</b>                        | <b>0.0</b>        | <b>0.1</b>   | <b>0.0</b>  | <b>0.1</b>   | <b>0.0</b>  | <b>0.1</b>   |
| <b>Fish, fish dishes</b>                        | <b>0.1</b>        | <b>1.2</b>   | <b>0.2</b>  | <b>1.9</b>   | <b>0.3</b>  | <b>1.6</b>   |
| <b>Eggs, egg dishes</b>                         | <b>0.0</b>        | <b>0.0</b>   | <b>0.0</b>  | <b>0.0</b>   | <b>0.0</b>  | <b>0.0</b>   |
| <b>Meat, meat dishes</b>                        | <b>0.5</b>        | <b>7.3</b>   | <b>0.8</b>  | <b>8.4</b>   | <b>1.3</b>  | <b>7.9</b>   |
| <b>Milk, dairy products</b>                     | <b>0.1</b>        | <b>2.1</b>   | <b>0.1</b>  | <b>1.2</b>   | <b>0.3</b>  | <b>1.6</b>   |
| <b>Sugar, sweets</b>                            | <b>0.0</b>        | <b>0.5</b>   | <b>0.0</b>  | <b>0.0</b>   | <b>0.0</b>  | <b>0.2</b>   |
| <b>Drinks</b>                                   | <b>0.1</b>        | <b>1.3</b>   | <b>0.0</b>  | <b>0.5</b>   | <b>0.1</b>  | <b>0.8</b>   |
| <b>Miscellaneous</b>                            | <b>0.3</b>        | <b>4.2</b>   | <b>0.1</b>  | <b>0.6</b>   | <b>0.3</b>  | <b>2.0</b>   |
| <b>Total</b>                                    | <b>6.6</b>        | <b>100.0</b> | <b>10.1</b> | <b>100.0</b> | <b>16.7</b> | <b>100.0</b> |

Table S 15: Sources of fat (mean and population proportion) in the diet on weekdays among Finnish 3- to 4-year-old preschool children who eat three meals at preschool. Main food groups and selected food groups are presented.

|                                                 | Outside preschool |              | Preschool   |              | Total       |              |
|-------------------------------------------------|-------------------|--------------|-------------|--------------|-------------|--------------|
|                                                 | g/day             | %            | g/day       | %            | g/day       | %            |
| <b>Vegetables, vegetable dishes</b>             | <b>0.9</b>        | <b>3.8</b>   | <b>0.8</b>  | <b>3.0</b>   | <b>1.6</b>  | <b>3.4</b>   |
| <b>Potatoes, potato dishes</b>                  | <b>0.4</b>        | <b>1.9</b>   | <b>0.3</b>  | <b>1.2</b>   | <b>0.7</b>  | <b>1.5</b>   |
| <b>Fruit, berries, fruit and berry products</b> | <b>0.3</b>        | <b>1.3</b>   | <b>0.3</b>  | <b>1.0</b>   | <b>0.5</b>  | <b>1.1</b>   |
| <b>Cereals, bakery products</b>                 | <b>3.5</b>        | <b>15.5</b>  | <b>2.9</b>  | <b>11.7</b>  | <b>6.4</b>  | <b>13.5</b>  |
| <b>Fats, oils, gravy</b>                        | <b>3.5</b>        | <b>15.8</b>  | <b>10.1</b> | <b>40.2</b>  | <b>13.6</b> | <b>28.7</b>  |
| margarine and fat spread                        | 1.4               | 6.1          | 9.8         | 39.1         | 11.2        | 23.6         |
| blended spread                                  | 1.7               | 7.6          | 0.0         | 0.0          | 1.7         | 3.6          |
| butter                                          | 0.2               | 0.8          | 0.0         | 0.0          | 0.2         | 0.4          |
| <b>Fish, fish dishes</b>                        | <b>1.0</b>        | <b>4.3</b>   | <b>1.7</b>  | <b>6.9</b>   | <b>2.7</b>  | <b>5.7</b>   |
| <b>Eggs, egg dishes</b>                         | <b>0.3</b>        | <b>1.4</b>   | <b>0.2</b>  | <b>1.0</b>   | <b>0.5</b>  | <b>1.1</b>   |
| <b>Meat, meat dishes</b>                        | <b>6.4</b>        | <b>28.8</b>  | <b>5.8</b>  | <b>23.1</b>  | <b>12.2</b> | <b>25.8</b>  |
| cold cuts                                       | 0.2               | 1.0          | 0.1         | 0.5          | 0.4         | 0.7          |
| red meat dishes                                 | 4.0               | 17.7         | 2.8         | 11.2         | 6.8         | 14.3         |
| poultry dishes                                  | 1.3               | 6.0          | 1.3         | 5.1          | 2.6         | 5.5          |
| sausage dishes                                  | 0.8               | 3.8          | 1.6         | 6.2          | 2.4         | 5.0          |
| <b>Milk, dairy products</b>                     | <b>4.8</b>        | <b>21.4</b>  | <b>2.7</b>  | <b>10.6</b>  | <b>7.4</b>  | <b>15.7</b>  |
| milk with 1-1.5% fat content                    | 1.3               | 5.6          | 0.5         | 2.1          | 1.8         | 3.7          |
| whole milk                                      | 0.2               | 0.8          | 0.0         | 0.0          | 0.2         | 0.4          |
| yoghurt and Finnish cultured milk               | 0.9               | 3.9          | 0.2         | 0.8          | 1.1         | 2.2          |
| cheese                                          | 1.4               | 6.5          | 0.7         | 2.9          | 2.2         | 4.6          |
| dairy-based desserts                            | 0.3               | 1.3          | 0.7         | 2.9          | 1.0         | 2.2          |
| <b>Sugar, sweets</b>                            | <b>0.5</b>        | <b>2.2</b>   | <b>0.0</b>  | <b>0.1</b>   | <b>0.5</b>  | <b>1.1</b>   |
| <b>Drinks</b>                                   | <b>0.2</b>        | <b>0.8</b>   | <b>0.1</b>  | <b>0.6</b>   | <b>0.3</b>  | <b>0.7</b>   |
| <b>Miscellaneous</b>                            | <b>0.6</b>        | <b>2.9</b>   | <b>0.1</b>  | <b>0.5</b>   | <b>0.8</b>  | <b>1.6</b>   |
| <b>Total</b>                                    | <b>22.3</b>       | <b>100.0</b> | <b>25.1</b> | <b>100.0</b> | <b>47.4</b> | <b>100.0</b> |

Table S 16: Sources of fat (mean and population proportion) in the diet on weekdays among Finnish 5- to 6-year-old preschool children who eat three meals at preschool. Main food groups and selected food groups are presented.

|                                                 | Outside preschool |              | Preschool   |              | Total       |              |
|-------------------------------------------------|-------------------|--------------|-------------|--------------|-------------|--------------|
|                                                 | g/day             | %            | g/day       | %            | g/day       | %            |
| <b>Vegetables, vegetable dishes</b>             | <b>0.7</b>        | <b>2.7</b>   | <b>0.9</b>  | <b>3.2</b>   | <b>1.6</b>  | <b>3.0</b>   |
| <b>Potatoes, potato dishes</b>                  | <b>0.7</b>        | <b>2.8</b>   | <b>0.4</b>  | <b>1.5</b>   | <b>1.1</b>  | <b>2.1</b>   |
| <b>Fruit, berries, fruit and berry products</b> | <b>0.4</b>        | <b>1.7</b>   | <b>0.2</b>  | <b>0.8</b>   | <b>0.7</b>  | <b>1.2</b>   |
| <b>Cereals, bakery products</b>                 | <b>3.6</b>        | <b>14.3</b>  | <b>3.8</b>  | <b>12.9</b>  | <b>7.3</b>  | <b>13.6</b>  |
| <b>Fats, oils, gravy</b>                        | <b>3.6</b>        | <b>14.3</b>  | <b>11.5</b> | <b>39.5</b>  | <b>15.0</b> | <b>27.9</b>  |
| margarine and fat spread                        | 1.3               | 5.3          | 11.1        | 38.4         | 12.5        | 23.1         |
| blended spread                                  | 1.6               | 6.4          | 0.0         | 0.1          | 1.6         | 3.0          |
| butter                                          | 0.2               | 0.8          | 0.0         | 0.0          | 0.2         | 0.4          |
| <b>Fish, fish dishes</b>                        | <b>1.1</b>        | <b>4.4</b>   | <b>1.9</b>  | <b>6.5</b>   | <b>3.0</b>  | <b>5.5</b>   |
| <b>Eggs, egg dishes</b>                         | <b>0.3</b>        | <b>1.2</b>   | <b>0.2</b>  | <b>0.7</b>   | <b>0.5</b>  | <b>0.9</b>   |
| <b>Meat, meat dishes</b>                        | <b>7.6</b>        | <b>30.4</b>  | <b>6.9</b>  | <b>23.6</b>  | <b>14.4</b> | <b>26.7</b>  |
| cold cuts                                       | 0.3               | 1.1          | 0.2         | 0.6          | 0.4         | 0.8          |
| red meat dishes                                 | 4.7               | 18.9         | 3.5         | 12.2         | 8.3         | 15.3         |
| poultry dishes                                  | 1.4               | 5.6          | 1.8         | 6.1          | 3.2         | 5.9          |
| sausage dishes                                  | 1.2               | 4.6          | 1.3         | 4.3          | 2.4         | 4.5          |
| <b>Milk, dairy products</b>                     | <b>5.2</b>        | <b>20.8</b>  | <b>2.9</b>  | <b>10.0</b>  | <b>8.1</b>  | <b>15.0</b>  |
| milk with 1-1.5% fat content                    | 1.0               | 4.0          | 0.7         | 2.3          | 1.7         | 3.1          |
| whole milk                                      | 0.2               | 0.8          | 0.0         | 0.0          | 0.2         | 0.4          |
| yoghurt and Finnish cultured milk               | 1.0               | 4.1          | 0.2         | 0.6          | 1.2         | 2.2          |
| cheese                                          | 1.6               | 6.4          | 0.7         | 2.6          | 2.3         | 4.3          |
| dairy-based desserts                            | 0.3               | 1.3          | 0.8         | 2.7          | 1.1         | 2.1          |
| <b>Sugar, sweets</b>                            | <b>0.8</b>        | <b>3.1</b>   | <b>0.1</b>  | <b>0.3</b>   | <b>0.9</b>  | <b>1.6</b>   |
| <b>Drinks</b>                                   | <b>0.1</b>        | <b>0.4</b>   | <b>0.1</b>  | <b>0.3</b>   | <b>0.2</b>  | <b>0.3</b>   |
| <b>Miscellaneous</b>                            | <b>0.9</b>        | <b>3.8</b>   | <b>0.2</b>  | <b>0.7</b>   | <b>1.1</b>  | <b>2.1</b>   |
| <b>Total</b>                                    | <b>25.0</b>       | <b>100.0</b> | <b>29.0</b> | <b>100.0</b> | <b>54.0</b> | <b>100.0</b> |

Table S 17: Sources of saturated fatty acids (mean and population proportion) in the diet on weekdays among Finnish 3- to 4-year-old preschool children who eat three meals at preschool. Main food groups and selected food groups are presented.

|                                                 | Outside preschool |              | Preschool  |              | Total       |              |
|-------------------------------------------------|-------------------|--------------|------------|--------------|-------------|--------------|
|                                                 | g/day             | %            | g/day      | %            | g/day       | %            |
| <b>Vegetables, vegetable dishes</b>             | <b>0.2</b>        | <b>2.5</b>   | <b>0.2</b> | <b>2.5</b>   | <b>0.4</b>  | <b>2.5</b>   |
| <b>Potatoes, potato dishes</b>                  | <b>0.2</b>        | <b>1.9</b>   | <b>0.1</b> | <b>1.5</b>   | <b>0.3</b>  | <b>1.7</b>   |
| <b>Fruit, berries, fruit and berry products</b> | <b>0.1</b>        | <b>0.6</b>   | <b>0.1</b> | <b>1.1</b>   | <b>0.1</b>  | <b>0.8</b>   |
| <b>Cereals, bakery products</b>                 | <b>1.1</b>        | <b>12.8</b>  | <b>0.7</b> | <b>8.6</b>   | <b>1.9</b>  | <b>10.8</b>  |
| <b>Fats, oils, gravy</b>                        | <b>1.3</b>        | <b>14.6</b>  | <b>2.9</b> | <b>35.0</b>  | <b>4.2</b>  | <b>24.5</b>  |
| margarine and fat spread                        | 0.4               | 4.5          | 2.9        | 34.4         | 3.3         | 19.1         |
| blended spread                                  | 0.7               | 7.9          | 0.0        | 0.0          | 0.7         | 4.0          |
| butter                                          | 0.1               | 1.4          | 0.0        | 0.0          | 0.1         | 0.7          |
| <b>Fish, fish dishes</b>                        | <b>0.2</b>        | <b>2.3</b>   | <b>0.4</b> | <b>5.0</b>   | <b>0.6</b>  | <b>3.6</b>   |
| <b>Eggs, egg dishes</b>                         | <b>0.1</b>        | <b>0.8</b>   | <b>0.0</b> | <b>0.6</b>   | <b>0.1</b>  | <b>0.7</b>   |
| <b>Meat, meat dishes</b>                        | <b>2.2</b>        | <b>24.4</b>  | <b>2.0</b> | <b>24.0</b>  | <b>4.2</b>  | <b>24.2</b>  |
| cold cuts                                       | 0.1               | 0.9          | 0.0        | 0.5          | 0.1         | 0.7          |
| red meat dishes                                 | 1.4               | 16.1         | 1.0        | 12.0         | 2.4         | 14.1         |
| poultry dishes                                  | 0.3               | 3.7          | 0.4        | 4.5          | 0.7         | 4.0          |
| sausage dishes                                  | 0.3               | 3.6          | 0.6        | 6.9          | 0.9         | 5.2          |
| <b>Milk, dairy products</b>                     | <b>3.1</b>        | <b>35.2</b>  | <b>1.8</b> | <b>20.9</b>  | <b>4.9</b>  | <b>28.3</b>  |
| milk with 1-1.5% fat content                    | 0.9               | 9.9          | 0.4        | 4.3          | 1.2         | 7.2          |
| whole milk                                      | 0.1               | 1.3          | 0.0        | 0.0          | 0.1         | 0.7          |
| yoghurt and Finnish cultured milk               | 0.6               | 6.3          | 0.1        | 1.4          | 0.7         | 3.9          |
| cheese                                          | 0.9               | 10.5         | 0.5        | 5.6          | 1.4         | 8.1          |
| dairy-based desserts                            | 0.2               | 2.1          | 0.5        | 5.7          | 0.7         | 3.8          |
| <b>Sugar, sweets</b>                            | <b>0.3</b>        | <b>3.1</b>   | <b>0.0</b> | <b>0.2</b>   | <b>0.3</b>  | <b>1.7</b>   |
| <b>Drinks</b>                                   | <b>0.0</b>        | <b>0.3</b>   | <b>0.0</b> | <b>0.3</b>   | <b>0.0</b>  | <b>0.3</b>   |
| <b>Miscellaneous</b>                            | <b>0.2</b>        | <b>1.7</b>   | <b>0.0</b> | <b>0.3</b>   | <b>0.2</b>  | <b>1.0</b>   |
| <b>Total</b>                                    | <b>8.9</b>        | <b>100.0</b> | <b>8.4</b> | <b>100.0</b> | <b>17.3</b> | <b>100.0</b> |



Table S 18: Sources of saturated fatty acids (mean and population proportion) in the diet on weekdays among Finnish 5- to 6-year-old preschool children who eat three meals at preschool. Main food groups and selected food groups are presented.

|                                                 | Outside preschool |              | Preschool  |              | Total       |              |
|-------------------------------------------------|-------------------|--------------|------------|--------------|-------------|--------------|
|                                                 | g/day             | %            | g/day      | %            | g/day       | %            |
| <b>Vegetables, vegetable dishes</b>             | <b>0.2</b>        | <b>2.2</b>   | <b>0.3</b> | <b>2.9</b>   | <b>0.5</b>  | <b>2.6</b>   |
| <b>Potatoes, potato dishes</b>                  | <b>0.2</b>        | <b>2.4</b>   | <b>0.2</b> | <b>1.9</b>   | <b>0.4</b>  | <b>2.2</b>   |
| <b>Fruit, berries, fruit and berry products</b> | <b>0.1</b>        | <b>1.0</b>   | <b>0.1</b> | <b>0.8</b>   | <b>0.2</b>  | <b>0.9</b>   |
| <b>Cereals, bakery products</b>                 | <b>1.1</b>        | <b>11.6</b>  | <b>1.1</b> | <b>10.8</b>  | <b>2.2</b>  | <b>11.2</b>  |
| <b>Fats, oils, gravy</b>                        | <b>1.2</b>        | <b>12.8</b>  | <b>3.4</b> | <b>34.4</b>  | <b>4.6</b>  | <b>23.6</b>  |
| margarine and fat spread                        | 0.4               | 3.8          | 3.3        | 33.7         | 3.7         | 18.7         |
| blended spread                                  | 0.7               | 6.7          | 0.0        | 0.1          | 0.7         | 3.4          |
| butter                                          | 0.1               | 1.3          | 0.0        | 0.0          | 0.1         | 0.7          |
| <b>Fish, fish dishes</b>                        | <b>0.3</b>        | <b>2.7</b>   | <b>0.4</b> | <b>4.4</b>   | <b>0.7</b>  | <b>3.5</b>   |
| <b>Eggs, egg dishes</b>                         | <b>0.1</b>        | <b>0.6</b>   | <b>0.0</b> | <b>0.4</b>   | <b>0.1</b>  | <b>0.5</b>   |
| <b>Meat, meat dishes</b>                        | <b>2.5</b>        | <b>25.9</b>  | <b>2.3</b> | <b>23.9</b>  | <b>4.9</b>  | <b>24.9</b>  |
| cold cuts                                       | 0.1               | 1.0          | 0.1        | 0.6          | 0.2         | 0.8          |
| red meat dishes                                 | 1.7               | 17.0         | 1.3        | 13.0         | 2.9         | 15.0         |
| poultry dishes                                  | 0.3               | 3.3          | 0.5        | 5.2          | 0.8         | 4.2          |
| sausage dishes                                  | 0.4               | 4.4          | 0.5        | 4.7          | 0.9         | 4.6          |
| <b>Milk, dairy products</b>                     | <b>3.4</b>        | <b>34.7</b>  | <b>1.9</b> | <b>19.6</b>  | <b>5.3</b>  | <b>27.1</b>  |
| milk with 1-1.5% fat content                    | 0.7               | 7.2          | 0.5        | 4.8          | 1.2         | 6.0          |
| whole milk                                      | 0.1               | 1.4          | 0.0        | 0.0          | 0.1         | 0.7          |
| yoghurt and Finnish cultured milk               | 0.7               | 6.9          | 0.1        | 1.1          | 0.8         | 4.0          |
| cheese                                          | 1.0               | 10.7         | 0.5        | 4.8          | 1.5         | 7.7          |
| dairy-based desserts                            | 0.2               | 1.8          | 0.5        | 5.2          | 0.7         | 3.5          |
| <b>Sugar, sweets</b>                            | <b>0.4</b>        | <b>4.5</b>   | <b>0.1</b> | <b>0.5</b>   | <b>0.5</b>  | <b>2.5</b>   |
| <b>Drinks</b>                                   | <b>0.0</b>        | <b>0.1</b>   | <b>0.0</b> | <b>0.1</b>   | <b>0.0</b>  | <b>0.1</b>   |
| <b>Miscellaneous</b>                            | <b>0.2</b>        | <b>1.6</b>   | <b>0.0</b> | <b>0.4</b>   | <b>0.2</b>  | <b>1.0</b>   |
| <b>Total</b>                                    | <b>9.8</b>        | <b>100.0</b> | <b>9.8</b> | <b>100.0</b> | <b>19.5</b> | <b>100.0</b> |

Table S 19: Sources of monounsaturated fatty acids (mean and population proportion) in the diet on weekdays among Finnish 3- to 4-year-old preschool children who eat three meals at preschool. Main food groups and selected food groups are presented.

|                                                 | Outside preschool |              | Preschool  |              | Total       |              |
|-------------------------------------------------|-------------------|--------------|------------|--------------|-------------|--------------|
|                                                 | g/day             | %            | g/day      | %            | g/day       | %            |
| <b>Vegetables, vegetable dishes</b>             | <b>0.3</b>        | <b>4.6</b>   | <b>0.3</b> | <b>3.0</b>   | <b>0.6</b>  | <b>3.7</b>   |
| <b>Potatoes, potato dishes</b>                  | <b>0.2</b>        | <b>2.0</b>   | <b>0.1</b> | <b>0.7</b>   | <b>0.2</b>  | <b>1.3</b>   |
| <b>Fruit, berries, fruit and berry products</b> | <b>0.0</b>        | <b>0.7</b>   | <b>0.0</b> | <b>0.5</b>   | <b>0.1</b>  | <b>0.5</b>   |
| <b>Cereals, bakery products</b>                 | <b>1.1</b>        | <b>15.2</b>  | <b>0.8</b> | <b>8.7</b>   | <b>1.9</b>  | <b>11.6</b>  |
| <b>Fats, oils, gravy</b>                        | <b>1.3</b>        | <b>17.3</b>  | <b>4.2</b> | <b>46.3</b>  | <b>5.5</b>  | <b>33.3</b>  |
| margarine and fat spread                        | 0.6               | 7.4          | 4.1        | 44.7         | 4.6         | 27.9         |
| blended spread                                  | 0.5               | 7.4          | 0.0        | 0.0          | 0.6         | 3.3          |
| butter                                          | 0.0               | 0.6          | 0.0        | 0.0          | 0.0         | 0.3          |
| <b>Fish, fish dishes</b>                        | <b>0.4</b>        | <b>4.8</b>   | <b>0.7</b> | <b>7.3</b>   | <b>1.0</b>  | <b>6.2</b>   |
| <b>Eggs, egg dishes</b>                         | <b>0.1</b>        | <b>1.4</b>   | <b>0.1</b> | <b>0.8</b>   | <b>0.2</b>  | <b>1.1</b>   |
| <b>Meat, meat dishes</b>                        | <b>2.5</b>        | <b>33.3</b>  | <b>2.3</b> | <b>24.8</b>  | <b>4.7</b>  | <b>28.6</b>  |
| cold cuts                                       | 0.1               | 1.1          | 0.1        | 0.6          | 0.1         | 0.8          |
| red meat dishes                                 | 1.5               | 19.8         | 1.1        | 11.9         | 2.6         | 15.5         |
| poultry dishes                                  | 0.5               | 7.3          | 0.5        | 5.3          | 1.0         | 6.2          |
| sausage dishes                                  | 0.3               | 4.7          | 0.6        | 7.0          | 1.0         | 6.0          |
| <b>Milk, dairy products</b>                     | <b>1.1</b>        | <b>14.9</b>  | <b>0.6</b> | <b>6.7</b>   | <b>1.7</b>  | <b>10.4</b>  |
| milk with 1-1.5% fat content                    | 0.3               | 4.1          | 0.1        | 1.3          | 0.4         | 2.6          |
| whole milk                                      | 0.0               | 0.5          | 0.0        | 0.0          | 0.0         | 0.2          |
| yoghurt and Finnish cultured milk               | 0.2               | 2.5          | 0.0        | 0.4          | 0.2         | 1.4          |
| cheese                                          | 0.3               | 4.5          | 0.2        | 1.8          | 0.5         | 3.1          |
| dairy-based desserts                            | 0.1               | 1.0          | 0.2        | 1.8          | 0.2         | 1.5          |
| <b>Sugar, sweets</b>                            | <b>0.1</b>        | <b>1.9</b>   | <b>0.0</b> | <b>0.1</b>   | <b>0.2</b>  | <b>0.9</b>   |
| <b>Drinks</b>                                   | <b>0.1</b>        | <b>0.8</b>   | <b>0.1</b> | <b>0.7</b>   | <b>0.1</b>  | <b>0.7</b>   |
| <b>Miscellaneous</b>                            | <b>0.2</b>        | <b>3.2</b>   | <b>0.0</b> | <b>0.5</b>   | <b>0.3</b>  | <b>1.7</b>   |
| <b>Total</b>                                    | <b>7.4</b>        | <b>100.0</b> | <b>9.1</b> | <b>100.0</b> | <b>16.5</b> | <b>100.0</b> |

Table S 20: Sources of monounsaturated fatty acids (mean and population proportion) in the diet on weekdays among Finnish 5- to 6-year-old preschool children who eat three meals at preschool. Main food groups and selected food groups are presented.

|                                                 | Outside preschool |              | Preschool   |              | Total       |              |
|-------------------------------------------------|-------------------|--------------|-------------|--------------|-------------|--------------|
|                                                 | g/day             | %            | g/day       | %            | g/day       | %            |
| <b>Vegetables, vegetable dishes</b>             | <b>0.2</b>        | <b>2.4</b>   | <b>0.3</b>  | <b>2.9</b>   | <b>0.5</b>  | <b>2.7</b>   |
| <b>Potatoes, potato dishes</b>                  | <b>0.3</b>        | <b>3.3</b>   | <b>0.1</b>  | <b>1.0</b>   | <b>0.4</b>  | <b>2.0</b>   |
| <b>Fruit, berries, fruit and berry products</b> | <b>0.1</b>        | <b>1.0</b>   | <b>0.0</b>  | <b>0.3</b>   | <b>0.1</b>  | <b>0.6</b>   |
| <b>Cereals, bakery products</b>                 | <b>1.2</b>        | <b>13.8</b>  | <b>1.0</b>  | <b>10.0</b>  | <b>2.2</b>  | <b>11.7</b>  |
| <b>Fats, oils, gravy</b>                        | <b>1.3</b>        | <b>15.7</b>  | <b>4.8</b>  | <b>45.7</b>  | <b>6.1</b>  | <b>32.4</b>  |
| margarine and fat spread                        | 0.5               | 6.3          | 4.6         | 44.1         | 5.2         | 27.3         |
| blended spread                                  | 0.5               | 6.2          | 0.0         | 0.1          | 0.5         | 2.8          |
| butter                                          | 0.0               | 0.6          | 0.0         | 0.0          | 0.0         | 0.2          |
| <b>Fish, fish dishes</b>                        | <b>0.4</b>        | <b>5.0</b>   | <b>0.7</b>  | <b>6.7</b>   | <b>1.1</b>  | <b>5.9</b>   |
| <b>Eggs, egg dishes</b>                         | <b>0.1</b>        | <b>1.3</b>   | <b>0.1</b>  | <b>0.6</b>   | <b>0.2</b>  | <b>0.9</b>   |
| <b>Meat, meat dishes</b>                        | <b>3.0</b>        | <b>35.5</b>  | <b>2.6</b>  | <b>25.1</b>  | <b>5.6</b>  | <b>29.7</b>  |
| cold cuts                                       | 0.1               | 1.3          | 0.1         | 0.7          | 0.2         | 1.0          |
| red meat dishes                                 | 1.8               | 21.4         | 1.3         | 12.9         | 3.1         | 16.6         |
| poultry dishes                                  | 0.6               | 6.9          | 0.6         | 6.2          | 1.2         | 6.5          |
| sausage dishes                                  | 0.5               | 5.7          | 0.5         | 5.0          | 1.0         | 5.3          |
| <b>Milk, dairy products</b>                     | <b>1.2</b>        | <b>14.5</b>  | <b>0.7</b>  | <b>6.4</b>   | <b>1.9</b>  | <b>10.0</b>  |
| milk with 1-1.5% fat content                    | 0.2               | 2.9          | 0.2         | 1.5          | 0.4         | 2.1          |
| whole milk                                      | 0.0               | 0.5          | 0.0         | 0.0          | 0.0         | 0.2          |
| yoghurt and Finnish cultured milk               | 0.2               | 2.7          | 0.0         | 0.3          | 0.3         | 1.4          |
| cheese                                          | 0.4               | 4.5          | 0.2         | 1.7          | 0.6         | 2.9          |
| dairy-based desserts                            | 0.1               | 1.0          | 0.2         | 1.7          | 0.3         | 1.4          |
| <b>Sugar, sweets</b>                            | <b>0.2</b>        | <b>2.7</b>   | <b>0.0</b>  | <b>0.2</b>   | <b>0.2</b>  | <b>1.3</b>   |
| <b>Drinks</b>                                   | <b>0.0</b>        | <b>0.5</b>   | <b>0.0</b>  | <b>0.2</b>   | <b>0.1</b>  | <b>0.3</b>   |
| <b>Miscellaneous</b>                            | <b>0.4</b>        | <b>4.4</b>   | <b>0.1</b>  | <b>0.8</b>   | <b>0.5</b>  | <b>2.4</b>   |
| <b>Total</b>                                    | <b>8.4</b>        | <b>100.0</b> | <b>10.5</b> | <b>100.0</b> | <b>18.8</b> | <b>100.0</b> |

Table S 21: Sources of polyunsaturated fatty acids (mean and population proportion) in the diet on weekdays among Finnish 3- to 4-year-old preschool children who eat three meals at preschool. Main food groups and selected food groups are presented.

|                                                 | Outside preschool |              | Preschool  |              | Total      |              |
|-------------------------------------------------|-------------------|--------------|------------|--------------|------------|--------------|
|                                                 | g/day             | %            | g/day      | %            | g/day      | %            |
| <b>Vegetables, vegetable dishes</b>             | <b>0.2</b>        | <b>5.6</b>   | <b>0.2</b> | <b>3.6</b>   | <b>0.4</b> | <b>4.4</b>   |
| <b>Potatoes, potato dishes</b>                  | <b>0.1</b>        | <b>1.9</b>   | <b>0.0</b> | <b>0.7</b>   | <b>0.1</b> | <b>1.2</b>   |
| <b>Fruit, berries, fruit and berry products</b> | <b>0.1</b>        | <b>1.8</b>   | <b>0.0</b> | <b>0.7</b>   | <b>0.1</b> | <b>1.1</b>   |
| <b>Cereals, bakery products</b>                 | <b>0.7</b>        | <b>21.6</b>  | <b>0.7</b> | <b>14.1</b>  | <b>1.4</b> | <b>17.0</b>  |
| <b>Fats, oils, gravy</b>                        | <b>0.6</b>        | <b>19.6</b>  | <b>2.5</b> | <b>50.7</b>  | <b>3.1</b> | <b>38.7</b>  |
| margarine and fat spread                        | 0.4               | 11.3         | 2.4        | 49.3         | 2.8        | 34.6         |
| blended spread                                  | 0.2               | 6.4          | 0.0        | 0.0          | 0.2        | 2.5          |
| butter                                          | 0.0               | 0.2          | 0.0        | 0.0          | 0.0        | 0.1          |
| <b>Fish, fish dishes</b>                        | <b>0.3</b>        | <b>8.7</b>   | <b>0.5</b> | <b>9.4</b>   | <b>0.7</b> | <b>9.1</b>   |
| <b>Eggs, egg dishes</b>                         | <b>0.0</b>        | <b>1.3</b>   | <b>0.0</b> | <b>0.6</b>   | <b>0.1</b> | <b>0.8</b>   |
| <b>Meat, meat dishes</b>                        | <b>0.9</b>        | <b>27.7</b>  | <b>0.9</b> | <b>17.4</b>  | <b>1.7</b> | <b>21.4</b>  |
| cold cuts                                       | 0.0               | 0.9          | 0.0        | 0.4          | 0.0        | 0.6          |
| red meat dishes                                 | 0.4               | 13.3         | 0.4        | 7.5          | 0.8        | 9.7          |
| poultry dishes                                  | 0.3               | 9.4          | 0.2        | 5.0          | 0.5        | 6.7          |
| sausage dishes                                  | 0.1               | 3.9          | 0.2        | 4.5          | 0.3        | 4.2          |
| <b>Milk, dairy products</b>                     | <b>0.1</b>        | <b>4.1</b>   | <b>0.1</b> | <b>1.2</b>   | <b>0.2</b> | <b>2.3</b>   |
| milk with 1-1.5% fat content                    | 0.0               | 0.8          | 0.0        | 0.2          | 0.0        | 0.4          |
| whole milk                                      | 0.0               | 0.1          | 0.0        | 0.0          | 0.0        | 0.0          |
| yoghurt and Finnish cultured milk               | 0.0               | 0.7          | 0.0        | 0.1          | 0.0        | 0.3          |
| cheese                                          | 0.0               | 1.3          | 0.0        | 0.4          | 0.1        | 0.7          |
| dairy-based desserts                            | 0.0               | 0.5          | 0.0        | 0.4          | 0.0        | 0.4          |
| <b>Sugar, sweets</b>                            | <b>0.0</b>        | <b>0.5</b>   | <b>0.0</b> | <b>0.0</b>   | <b>0.0</b> | <b>0.2</b>   |
| <b>Drinks</b>                                   | <b>0.1</b>        | <b>2.0</b>   | <b>0.1</b> | <b>1.1</b>   | <b>0.1</b> | <b>1.4</b>   |
| <b>Miscellaneous</b>                            | <b>0.2</b>        | <b>5.3</b>   | <b>0.0</b> | <b>0.5</b>   | <b>0.2</b> | <b>2.4</b>   |
| <b>Total</b>                                    | <b>3.1</b>        | <b>100.0</b> | <b>4.9</b> | <b>100.0</b> | <b>8.0</b> | <b>100.0</b> |

Table S 22: Sources of polyunsaturated fatty acids (mean and population proportion) in the diet on weekdays among Finnish 5- to 6-year-old preschool children who eat three meals at preschool. Main food groups and selected food groups are presented.

|                                                 | Outside preschool |              | Preschool  |              | Total      |              |
|-------------------------------------------------|-------------------|--------------|------------|--------------|------------|--------------|
|                                                 | g/day             | %            | g/day      | %            | g/day      | %            |
| <b>Vegetables, vegetable dishes</b>             | <b>0.2</b>        | <b>4.4</b>   | <b>0.2</b> | <b>3.5</b>   | <b>0.4</b> | <b>3.9</b>   |
| <b>Potatoes, potato dishes</b>                  | <b>0.1</b>        | <b>3.3</b>   | <b>0.1</b> | <b>0.9</b>   | <b>0.2</b> | <b>1.8</b>   |
| <b>Fruit, berries, fruit and berry products</b> | <b>0.1</b>        | <b>2.3</b>   | <b>0.0</b> | <b>0.6</b>   | <b>0.1</b> | <b>1.2</b>   |
| <b>Cereals, bakery products</b>                 | <b>0.7</b>        | <b>20.3</b>  | <b>0.8</b> | <b>14.4</b>  | <b>1.6</b> | <b>16.7</b>  |
| <b>Fats, oils, gravy</b>                        | <b>0.7</b>        | <b>18.8</b>  | <b>2.8</b> | <b>49.1</b>  | <b>3.5</b> | <b>37.4</b>  |
| margarine and fat spread                        | 0.4               | 10.1         | 2.7        | 47.7         | 3.1        | 33.2         |
| blended spread                                  | 0.2               | 5.2          | 0.0        | 0.0          | 0.2        | 2.0          |
| butter                                          | 0.0               | 0.2          | 0.0        | 0.0          | 0.0        | 0.1          |
| <b>Fish, fish dishes</b>                        | <b>0.3</b>        | <b>8.0</b>   | <b>0.6</b> | <b>10.1</b>  | <b>0.9</b> | <b>9.3</b>   |
| <b>Eggs, egg dishes</b>                         | <b>0.0</b>        | <b>1.2</b>   | <b>0.0</b> | <b>0.4</b>   | <b>0.1</b> | <b>0.7</b>   |
| <b>Meat, meat dishes</b>                        | <b>1.0</b>        | <b>28.5</b>  | <b>1.1</b> | <b>18.5</b>  | <b>2.1</b> | <b>22.4</b>  |
| cold cuts                                       | 0.0               | 1.0          | 0.0        | 0.4          | 0.1        | 0.7          |
| red meat dishes                                 | 0.5               | 13.6         | 0.5        | 8.2          | 1.0        | 10.3         |
| poultry dishes                                  | 0.3               | 9.2          | 0.4        | 6.2          | 0.7        | 7.4          |
| sausage dishes                                  | 0.2               | 4.5          | 0.2        | 3.3          | 0.4        | 3.8          |
| <b>Milk, dairy products</b>                     | <b>0.1</b>        | <b>3.9</b>   | <b>0.1</b> | <b>1.1</b>   | <b>0.2</b> | <b>2.2</b>   |
| milk with 1-1.5% fat content                    | 0.0               | 0.5          | 0.0        | 0.2          | 0.0        | 0.4          |
| whole milk                                      | 0.0               | 0.1          | 0.0        | 0.0          | 0.0        | 0.0          |
| yoghurt and Finnish cultured milk               | 0.0               | 0.7          | 0.0        | 0.1          | 0.0        | 0.3          |
| cheese                                          | 0.0               | 1.2          | 0.0        | 0.3          | 0.1        | 0.7          |
| dairy-based desserts                            | 0.0               | 0.6          | 0.0        | 0.4          | 0.0        | 0.5          |
| <b>Sugar, sweets</b>                            | <b>0.0</b>        | <b>0.6</b>   | <b>0.0</b> | <b>0.0</b>   | <b>0.0</b> | <b>0.3</b>   |
| <b>Drinks</b>                                   | <b>0.0</b>        | <b>1.0</b>   | <b>0.0</b> | <b>0.4</b>   | <b>0.1</b> | <b>0.7</b>   |
| <b>Miscellaneous</b>                            | <b>0.3</b>        | <b>7.6</b>   | <b>0.1</b> | <b>0.9</b>   | <b>0.3</b> | <b>3.5</b>   |
| <b>Total</b>                                    | <b>3.6</b>        | <b>100.0</b> | <b>5.7</b> | <b>100.0</b> | <b>9.4</b> | <b>100.0</b> |

Table S 23: Sources of vitamin A (retinol activity equivalents) (mean and population proportion) in the diet on weekdays among Finnish 3- to 4-year-old preschool children who eat three meals at preschool. Main food groups and selected food groups are presented.

|                                                 | Outside preschool |            | Preschool         |            | Total             |            |
|-------------------------------------------------|-------------------|------------|-------------------|------------|-------------------|------------|
|                                                 | $\mu\text{g/day}$ | %          | $\mu\text{g/day}$ | %          | $\mu\text{g/day}$ | %          |
| <b>Vegetables, vegetable dishes</b>             | <b>84</b>         | <b>28</b>  | <b>94</b>         | <b>30</b>  | <b>178</b>        | <b>29</b>  |
| fresh vegetables and vegetable salads           | 66                | 22         | 64                | 21         | 130               | 21         |
| vegetarian dishes                               | 8                 | 3          | 24                | 8          | 32                | 5          |
| side dish vegetables                            | 9                 | 3          | 6                 | 2          | 15                | 2          |
| <b>Potatoes, potato dishes</b>                  | <b>3</b>          | <b>1</b>   | <b>3</b>          | <b>1</b>   | <b>6</b>          | <b>1</b>   |
| <b>Fruit, berries, fruit and berry products</b> | <b>7</b>          | <b>2</b>   | <b>9</b>          | <b>3</b>   | <b>16</b>         | <b>3</b>   |
| <b>Cereals, bakery products</b>                 | <b>13</b>         | <b>4</b>   | <b>8</b>          | <b>2</b>   | <b>21</b>         | <b>3</b>   |
| <b>Fats, oils, gravy</b>                        | <b>34</b>         | <b>11</b>  | <b>128</b>        | <b>41</b>  | <b>162</b>        | <b>26</b>  |
| margarine and fat spread                        | 18                | 6          | 127               | 41         | 145               | 24         |
| blended spread                                  | 13                | 4          | 0                 | 0          | 13                | 2          |
| <b>Fish, fish dishes</b>                        | <b>3</b>          | <b>1</b>   | <b>6</b>          | <b>2</b>   | <b>9</b>          | <b>1</b>   |
| <b>Eggs, egg dishes</b>                         | <b>5</b>          | <b>2</b>   | <b>5</b>          | <b>2</b>   | <b>10</b>         | <b>2</b>   |
| <b>Meat, meat dishes</b>                        | <b>98</b>         | <b>33</b>  | <b>27</b>         | <b>9</b>   | <b>125</b>        | <b>20</b>  |
| red meat dishes                                 | 86                | 29         | 8                 | 3          | 94                | 15         |
| poultry dishes                                  | 5                 | 2          | 8                 | 2          | 13                | 2          |
| liver and blood foods                           | 6                 | 2          | 10                | 3          | 16                | 3          |
| <b>Milk, dairy products</b>                     | <b>40</b>         | <b>13</b>  | <b>22</b>         | <b>7</b>   | <b>62</b>         | <b>10</b>  |
| milk with 1-1.5% fat content                    | 12                | 4          | 4                 | 1          | 16                | 3          |
| yoghurt and Finnish cultured milk               | 8                 | 3          | 2                 | 1          | 10                | 2          |
| cheese                                          | 11                | 4          | 6                 | 2          | 17                | 3          |
| <b>Sugar, sweets</b>                            | <b>1</b>          | <b>0</b>   | <b>0</b>          | <b>0</b>   | <b>2</b>          | <b>0</b>   |
| <b>Drinks</b>                                   | <b>2</b>          | <b>1</b>   | <b>2</b>          | <b>1</b>   | <b>4</b>          | <b>1</b>   |
| <b>Miscellaneous</b>                            | <b>12</b>         | <b>4</b>   | <b>8</b>          | <b>3</b>   | <b>19</b>         | <b>3</b>   |
| <b>Total</b>                                    | <b>302</b>        | <b>100</b> | <b>311</b>        | <b>100</b> | <b>613</b>        | <b>100</b> |

Table S 24: Sources of vitamin A (retinol activity equivalents) (mean and population proportion) in the diet on weekdays among Finnish 5- to 6-year-old preschool children who eat three meals at preschool. Main food groups and selected food groups are presented.

|                                                 | Outside preschool        |            | Preschool                |            | Total                    |            |
|-------------------------------------------------|--------------------------|------------|--------------------------|------------|--------------------------|------------|
|                                                 | $\mu\text{g}/\text{day}$ | %          | $\mu\text{g}/\text{day}$ | %          | $\mu\text{g}/\text{day}$ | %          |
| <b>Vegetables, vegetable dishes</b>             | <b>85</b>                | <b>32</b>  | <b>118</b>               | <b>30</b>  | <b>203</b>               | <b>31</b>  |
| fresh vegetables and vegetable salads           | 65                       | 24         | 77                       | 20         | 142                      | 22         |
| vegetarian dishes                               | 12                       | 4          | 31                       | 8          | 43                       | 6          |
| side dish vegetables                            | 8                        | 3          | 10                       | 2          | 18                       | 3          |
| <b>Potatoes, potato dishes</b>                  | <b>3</b>                 | <b>1</b>   | <b>4</b>                 | <b>1</b>   | <b>7</b>                 | <b>1</b>   |
| <b>Fruit, berries, fruit and berry products</b> | <b>7</b>                 | <b>3</b>   | <b>5</b>                 | <b>1</b>   | <b>12</b>                | <b>2</b>   |
| <b>Cereals, bakery products</b>                 | <b>12</b>                | <b>4</b>   | <b>11</b>                | <b>3</b>   | <b>23</b>                | <b>3</b>   |
| <b>Fats, oils, gravy</b>                        | <b>34</b>                | <b>12</b>  | <b>144</b>               | <b>37</b>  | <b>178</b>               | <b>27</b>  |
| margarine and fat spread                        | 18                       | 7          | 144                      | 37         | 162                      | 25         |
| blended spread                                  | 12                       | 4          | 0                        | 0          | 12                       | 2          |
| <b>Fish, fish dishes</b>                        | <b>5</b>                 | <b>2</b>   | <b>6</b>                 | <b>2</b>   | <b>11</b>                | <b>2</b>   |
| <b>Eggs, egg dishes</b>                         | <b>5</b>                 | <b>2</b>   | <b>4</b>                 | <b>1</b>   | <b>9</b>                 | <b>1</b>   |
| <b>Meat, meat dishes</b>                        | <b>66</b>                | <b>24</b>  | <b>63</b>                | <b>16</b>  | <b>129</b>               | <b>20</b>  |
| red meat dishes                                 | 56                       | 21         | 11                       | 3          | 68                       | 10         |
| poultry dishes                                  | 5                        | 2          | 11                       | 3          | 16                       | 2          |
| liver and blood foods                           | 3                        | 1          | 40                       | 10         | 43                       | 7          |
| <b>Milk, dairy products</b>                     | <b>42</b>                | <b>16</b>  | <b>24</b>                | <b>6</b>   | <b>66</b>                | <b>10</b>  |
| milk with 1-1.5% fat content                    | 9                        | 3          | 6                        | 2          | 15                       | 2          |
| yoghurt and Finnish cultured milk               | 9                        | 3          | 2                        | 0          | 11                       | 2          |
| cheese                                          | 12                       | 4          | 6                        | 1          | 17                       | 3          |
| <b>Sugar, sweets</b>                            | <b>2</b>                 | <b>1</b>   | <b>0</b>                 | <b>0</b>   | <b>2</b>                 | <b>0</b>   |
| <b>Drinks</b>                                   | <b>0</b>                 | <b>0</b>   | <b>2</b>                 | <b>1</b>   | <b>3</b>                 | <b>0</b>   |
| <b>Miscellaneous</b>                            | <b>9</b>                 | <b>3</b>   | <b>7</b>                 | <b>2</b>   | <b>16</b>                | <b>2</b>   |
| <b>Total</b>                                    | <b>270</b>               | <b>100</b> | <b>389</b>               | <b>100</b> | <b>659</b>               | <b>100</b> |

Table S 25: Sources of vitamin D (mean and population proportion) in the diet on weekdays among Finnish 3- to 4-year-old preschool children who eat three meals at preschool. Main food groups and selected food groups are presented.

|                                                 | Outside preschool |              | Preschool         |              | Total             |              |
|-------------------------------------------------|-------------------|--------------|-------------------|--------------|-------------------|--------------|
|                                                 | $\mu\text{g/day}$ | %            | $\mu\text{g/day}$ | %            | $\mu\text{g/day}$ | %            |
| <b>Vegetables, vegetable dishes</b>             | <b>0.0</b>        | <b>1.0</b>   | <b>0.0</b>        | <b>0.4</b>   | <b>0.1</b>        | <b>0.6</b>   |
| <b>Potatoes, potato dishes</b>                  | <b>0.0</b>        | <b>0.8</b>   | <b>0.0</b>        | <b>0.1</b>   | <b>0.0</b>        | <b>0.4</b>   |
| <b>Fruit, berries, fruit and berry products</b> | <b>0.0</b>        | <b>0.1</b>   | <b>0.0</b>        | <b>0.5</b>   | <b>0.0</b>        | <b>0.4</b>   |
| <b>Cereals, bakery products</b>                 | <b>0.2</b>        | <b>5.2</b>   | <b>0.2</b>        | <b>2.4</b>   | <b>0.4</b>        | <b>3.3</b>   |
| <b>Fats, oils, gravy</b>                        | <b>0.8</b>        | <b>22.2</b>  | <b>3.2</b>        | <b>42.9</b>  | <b>4.0</b>        | <b>36.3</b>  |
| margarine and fat spread                        | 0.4               | 12.2         | 3.2               | 42.9         | 3.6               | 33.0         |
| blended spread                                  | 0.3               | 9.6          | 0.0               | 0.0          | 0.3               | 3.1          |
| <b>Fish, fish dishes</b>                        | <b>0.3</b>        | <b>9.5</b>   | <b>0.5</b>        | <b>6.6</b>   | <b>0.8</b>        | <b>7.5</b>   |
| <b>Eggs, egg dishes</b>                         | <b>0.1</b>        | <b>1.6</b>   | <b>0.1</b>        | <b>0.7</b>   | <b>0.1</b>        | <b>1.0</b>   |
| <b>Meat, meat dishes</b>                        | <b>0.2</b>        | <b>5.1</b>   | <b>0.1</b>        | <b>1.6</b>   | <b>0.3</b>        | <b>2.7</b>   |
| <b>Milk, dairy products</b>                     | <b>1.8</b>        | <b>51.7</b>  | <b>3.2</b>        | <b>43.6</b>  | <b>5.1</b>        | <b>46.2</b>  |
| skimmed milk                                    | 0.8               | 21.3         | 2.6               | 34.8         | 3.3               | 30.4         |
| milk with 1-1.5% fat content                    | 0.8               | 21.8         | 0.5               | 6.7          | 1.3               | 11.6         |
| yoghurt and Finnish cultured milk               | 0.1               | 3.8          | 0.0               | 0.5          | 0.2               | 1.6          |
| cheese                                          | 0.0               | 0.4          | 0.0               | 0.1          | 0.0               | 0.2          |
| dairy-based desserts                            | 0.0               | 0.4          | 0.0               | 0.4          | 0.0               | 0.4          |
| <b>Sugar, sweets</b>                            | <b>0.0</b>        | <b>0.0</b>   | <b>0.0</b>        | <b>0.0</b>   | <b>0.0</b>        | <b>0.0</b>   |
| <b>Drinks</b>                                   | <b>0.1</b>        | <b>2.4</b>   | <b>0.1</b>        | <b>1.1</b>   | <b>0.2</b>        | <b>1.5</b>   |
| non-dairy milk substitutes                      | 0.1               | 1.7          | 0.1               | 1.0          | 0.1               | 1.3          |
| <b>Miscellaneous</b>                            | <b>0.0</b>        | <b>0.3</b>   | <b>0.0</b>        | <b>0.0</b>   | <b>0.0</b>        | <b>0.1</b>   |
| <b>Total</b>                                    | <b>3.5</b>        | <b>100.0</b> | <b>7.4</b>        | <b>100.0</b> | <b>10.9</b>       | <b>100.0</b> |

Table S 26: Sources of vitamin D (mean and population proportion) in the diet on weekdays among Finnish 5- to 6-year-old preschool children who eat three meals at preschool. Main food groups and selected food groups are presented.

|                                                 | Outside preschool |              | Preschool         |              | Total             |              |
|-------------------------------------------------|-------------------|--------------|-------------------|--------------|-------------------|--------------|
|                                                 | $\mu\text{g/day}$ | %            | $\mu\text{g/day}$ | %            | $\mu\text{g/day}$ | %            |
| <b>Vegetables, vegetable dishes</b>             | <b>0.1</b>        | <b>1.5</b>   | <b>0.0</b>        | <b>0.5</b>   | <b>0.1</b>        | <b>0.8</b>   |
| <b>Potatoes, potato dishes</b>                  | <b>0.0</b>        | <b>0.8</b>   | <b>0.0</b>        | <b>0.2</b>   | <b>0.0</b>        | <b>0.4</b>   |
| <b>Fruit, berries, fruit and berry products</b> | <b>0.0</b>        | <b>1.2</b>   | <b>0.0</b>        | <b>0.5</b>   | <b>0.1</b>        | <b>0.7</b>   |
| <b>Cereals, bakery products</b>                 | <b>0.2</b>        | <b>5.0</b>   | <b>0.2</b>        | <b>2.6</b>   | <b>0.4</b>        | <b>3.4</b>   |
| <b>Fats, oils, gravy</b>                        | <b>0.8</b>        | <b>19.8</b>  | <b>3.6</b>        | <b>44.2</b>  | <b>4.4</b>        | <b>36.3</b>  |
| margarine and fat spread                        | 0.4               | 11.1         | 3.6               | 44.2         | 4.0               | 33.5         |
| blended spread                                  | 0.3               | 8.0          | 0.0               | 0.0          | 0.3               | 2.6          |
| <b>Fish, fish dishes</b>                        | <b>0.4</b>        | <b>10.9</b>  | <b>0.5</b>        | <b>6.4</b>   | <b>0.9</b>        | <b>7.8</b>   |
| <b>Eggs, egg dishes</b>                         | <b>0.1</b>        | <b>1.5</b>   | <b>0.0</b>        | <b>0.5</b>   | <b>0.1</b>        | <b>0.8</b>   |
| <b>Meat, meat dishes</b>                        | <b>0.2</b>        | <b>4.9</b>   | <b>0.2</b>        | <b>2.0</b>   | <b>0.4</b>        | <b>2.9</b>   |
| <b>Milk, dairy products</b>                     | <b>2.0</b>        | <b>52.1</b>  | <b>3.5</b>        | <b>42.7</b>  | <b>5.5</b>        | <b>45.7</b>  |
| skimmed milk                                    | 1.0               | 25.8         | 2.7               | 33.3         | 3.7               | 30.9         |
| milk with 1-1.5% fat content                    | 0.6               | 16.2         | 0.6               | 6.9          | 1.2               | 9.9          |
| yoghurt and Finnish cultured milk               | 0.1               | 3.0          | 0.0               | 0.5          | 0.2               | 1.3          |
| cheese                                          | 0.0               | 0.5          | 0.0               | 0.1          | 0.0               | 0.2          |
| dairy-based desserts                            | 0.0               | 0.7          | 0.0               | 0.3          | 0.1               | 0.5          |
| <b>Sugar, sweets</b>                            | <b>0.0</b>        | <b>0.0</b>   | <b>0.0</b>        | <b>0.0</b>   | <b>0.0</b>        | <b>0.0</b>   |
| <b>Drinks</b>                                   | <b>0.1</b>        | <b>2.0</b>   | <b>0.0</b>        | <b>0.6</b>   | <b>0.1</b>        | <b>1.0</b>   |
| non-dairy milk substitutes                      | 0.1               | 2.0          | 0.0               | 0.5          | 0.1               | 1.0          |
| <b>Miscellaneous</b>                            | <b>0.0</b>        | <b>0.2</b>   | <b>0.0</b>        | <b>0.0</b>   | <b>0.0</b>        | <b>0.0</b>   |
| <b>Total</b>                                    | <b>3.9</b>        | <b>100.0</b> | <b>8.2</b>        | <b>100.0</b> | <b>12.1</b>       | <b>100.0</b> |



Table S 27: Sources of vitamin E (mean and population proportion) in the diet on weekdays among Finnish 3- to 4-year-old preschool children who eat three meals at preschool. Main food groups and selected food groups are presented.

|                                                 | Outside preschool |              | Preschool   |              | Total       |              |
|-------------------------------------------------|-------------------|--------------|-------------|--------------|-------------|--------------|
|                                                 | mg/day            | %            | mg/day      | %            | mg/day      | %            |
| <b>Vegetables, vegetable dishes</b>             | <b>0.29</b>       | <b>11.2</b>  | <b>0.25</b> | <b>6.3</b>   | <b>0.54</b> | <b>8.2</b>   |
| fresh vegetables and vegetable salads           | 0.17              | 6.4          | 0.12        | 3.0          | 0.29        | 4.4          |
| <b>Potatoes, potato dishes</b>                  | <b>0.06</b>       | <b>2.2</b>   | <b>0.03</b> | <b>0.7</b>   | <b>0.09</b> | <b>1.3</b>   |
| <b>Fruit, berries, fruit and berry products</b> | <b>0.27</b>       | <b>10.4</b>  | <b>0.19</b> | <b>4.8</b>   | <b>0.46</b> | <b>7.0</b>   |
| <b>Cereals, bakery products</b>                 | <b>0.52</b>       | <b>19.7</b>  | <b>0.60</b> | <b>15.3</b>  | <b>1.11</b> | <b>17.0</b>  |
| <b>Fats, oils, gravy</b>                        | <b>0.39</b>       | <b>15.1</b>  | <b>1.78</b> | <b>45.5</b>  | <b>2.18</b> | <b>33.3</b>  |
| margarine and fat spread                        | 0.24              | 9.2          | 1.73        | 44.2         | 1.97        | 30.2         |
| blended spread                                  | 0.11              | 4.4          | 0.00        | 0.0          | 0.11        | 1.7          |
| <b>Fish, fish dishes</b>                        | <b>0.17</b>       | <b>6.4</b>   | <b>0.36</b> | <b>9.2</b>   | <b>0.53</b> | <b>8.1</b>   |
| <b>Eggs, egg dishes</b>                         | <b>0.04</b>       | <b>1.6</b>   | <b>0.03</b> | <b>0.8</b>   | <b>0.07</b> | <b>1.1</b>   |
| <b>Meat, meat dishes</b>                        | <b>0.49</b>       | <b>18.9</b>  | <b>0.47</b> | <b>12.0</b>  | <b>0.96</b> | <b>14.7</b>  |
| red meat dishes                                 | 0.26              | 9.8          | 0.21        | 5.4          | 0.47        | 7.2          |
| poultry dishes                                  | 0.21              | 7.9          | 0.20        | 5.0          | 0.40        | 6.2          |
| <b>Milk, dairy products</b>                     | <b>0.14</b>       | <b>5.5</b>   | <b>0.09</b> | <b>2.3</b>   | <b>0.23</b> | <b>3.6</b>   |
| <b>Sugar, sweets</b>                            | <b>0.02</b>       | <b>0.6</b>   | <b>0.00</b> | <b>0.0</b>   | <b>0.02</b> | <b>0.2</b>   |
| <b>Drinks</b>                                   | <b>0.07</b>       | <b>2.8</b>   | <b>0.08</b> | <b>1.9</b>   | <b>0.15</b> | <b>2.3</b>   |
| <b>Miscellaneous</b>                            | <b>0.15</b>       | <b>5.6</b>   | <b>0.05</b> | <b>1.3</b>   | <b>0.20</b> | <b>3.0</b>   |
| <b>Total</b>                                    | <b>2.61</b>       | <b>100.0</b> | <b>3.91</b> | <b>100.0</b> | <b>6.52</b> | <b>100.0</b> |

Table S 28: Sources of vitamin E (mean and population proportion) in the diet on weekdays among Finnish 5- to 6-year-old preschool children who eat three meals at preschool. Main food groups and selected food groups are presented.

|                                                 | Outside preschool |              | Preschool   |              | Total       |              |
|-------------------------------------------------|-------------------|--------------|-------------|--------------|-------------|--------------|
|                                                 | mg/day            | %            | mg/day      | %            | mg/day      | %            |
| <b>Vegetables, vegetable dishes</b>             | <b>0.28</b>       | <b>9.1</b>   | <b>0.29</b> | <b>6.4</b>   | <b>0.56</b> | <b>7.5</b>   |
| fresh vegetables and vegetable salads           | 0.16              | 5.4          | 0.14        | 3.2          | 0.31        | 4.1          |
| <b>Potatoes, potato dishes</b>                  | <b>0.13</b>       | <b>4.4</b>   | <b>0.04</b> | <b>0.9</b>   | <b>0.17</b> | <b>2.3</b>   |
| <b>Fruit, berries, fruit and berry products</b> | <b>0.38</b>       | <b>12.7</b>  | <b>0.18</b> | <b>4.1</b>   | <b>0.57</b> | <b>7.6</b>   |
| <b>Cereals, bakery products</b>                 | <b>0.57</b>       | <b>18.8</b>  | <b>0.70</b> | <b>15.5</b>  | <b>1.26</b> | <b>16.8</b>  |
| <b>Fats, oils, gravy</b>                        | <b>0.45</b>       | <b>14.8</b>  | <b>2.00</b> | <b>44.6</b>  | <b>2.45</b> | <b>32.6</b>  |
| margarine and fat spread                        | 0.25              | 8.3          | 1.94        | 43.2         | 2.19        | 29.2         |
| blended spread                                  | 0.11              | 3.6          | 0.00        | 0.0          | 0.11        | 1.5          |
| <b>Fish, fish dishes</b>                        | <b>0.20</b>       | <b>6.6</b>   | <b>0.43</b> | <b>9.6</b>   | <b>0.63</b> | <b>8.4</b>   |
| <b>Eggs, egg dishes</b>                         | <b>0.04</b>       | <b>1.4</b>   | <b>0.03</b> | <b>0.6</b>   | <b>0.07</b> | <b>0.9</b>   |
| <b>Meat, meat dishes</b>                        | <b>0.57</b>       | <b>18.9</b>  | <b>0.60</b> | <b>13.4</b>  | <b>1.17</b> | <b>15.6</b>  |
| red meat dishes                                 | 0.31              | 10.1         | 0.27        | 5.9          | 0.57        | 7.6          |
| poultry dishes                                  | 0.23              | 7.7          | 0.27        | 6.1          | 0.51        | 6.7          |
| <b>Milk, dairy products</b>                     | <b>0.16</b>       | <b>5.3</b>   | <b>0.11</b> | <b>2.5</b>   | <b>0.27</b> | <b>3.6</b>   |
| <b>Sugar, sweets</b>                            | <b>0.01</b>       | <b>0.4</b>   | <b>0.00</b> | <b>0.0</b>   | <b>0.01</b> | <b>0.2</b>   |
| <b>Drinks</b>                                   | <b>0.04</b>       | <b>1.2</b>   | <b>0.05</b> | <b>1.1</b>   | <b>0.09</b> | <b>1.1</b>   |
| <b>Miscellaneous</b>                            | <b>0.19</b>       | <b>6.3</b>   | <b>0.06</b> | <b>1.2</b>   | <b>0.25</b> | <b>3.3</b>   |
| <b>Total</b>                                    | <b>3.01</b>       | <b>100.0</b> | <b>4.49</b> | <b>100.0</b> | <b>7.51</b> | <b>100.0</b> |

Table S 29: Sources of thiamine (mean and population proportion) in the diet on weekdays among Finnish 3- to 4-year-old preschool children who eat three meals at preschool. Main food groups and selected food groups are presented.

|                                                 | Outside preschool |              | Preschool   |              | Total       |              |
|-------------------------------------------------|-------------------|--------------|-------------|--------------|-------------|--------------|
|                                                 | mg/day            | %            | mg/day      | %            | mg/day      | %            |
| <b>Vegetables, vegetable dishes</b>             | <b>0.03</b>       | <b>8.2</b>   | <b>0.03</b> | <b>6.3</b>   | <b>0.06</b> | <b>7.1</b>   |
| <b>Potatoes, potato dishes</b>                  | <b>0.03</b>       | <b>7.9</b>   | <b>0.06</b> | <b>12.1</b>  | <b>0.09</b> | <b>10.2</b>  |
| <b>Fruit, berries, fruit and berry products</b> | <b>0.03</b>       | <b>7.9</b>   | <b>0.02</b> | <b>4.4</b>   | <b>0.05</b> | <b>5.8</b>   |
| fresh fruit                                     | 0.02              | 5.4          | 0.01        | 1.7          | 0.03        | 3.3          |
| <b>Cereals, bakery products</b>                 | <b>0.07</b>       | <b>19.6</b>  | <b>0.12</b> | <b>24.9</b>  | <b>0.19</b> | <b>22.5</b>  |
| rye bread                                       | 0.01              | 2.5          | 0.02        | 3.4          | 0.03        | 3.0          |
| rye crispbread                                  | 0.00              | 1.1          | 0.02        | 5.1          | 0.03        | 3.3          |
| multi-grain bread                               | 0.01              | 3.8          | 0.04        | 7.6          | 0.05        | 6.0          |
| white bread                                     | 0.00              | 0.5          | 0.00        | 0.4          | 0.00        | 0.5          |
| porridge                                        | 0.01              | 2.5          | 0.02        | 5.1          | 0.03        | 4.0          |
| <b>Fats, oils, gravy</b>                        | <b>0.00</b>       | <b>0.3</b>   | <b>0.00</b> | <b>0.0</b>   | <b>0.00</b> | <b>0.1</b>   |
| <b>Fish, fish dishes</b>                        | <b>0.01</b>       | <b>2.7</b>   | <b>0.03</b> | <b>5.5</b>   | <b>0.04</b> | <b>4.4</b>   |
| <b>Eggs, egg dishes</b>                         | <b>0.00</b>       | <b>0.8</b>   | <b>0.00</b> | <b>0.6</b>   | <b>0.01</b> | <b>0.7</b>   |
| <b>Meat, meat dishes</b>                        | <b>0.09</b>       | <b>25.1</b>  | <b>0.10</b> | <b>21.1</b>  | <b>0.19</b> | <b>22.9</b>  |
| cold cuts                                       | 0.01              | 3.5          | 0.01        | 2.3          | 0.02        | 2.9          |
| red meat dishes                                 | 0.06              | 15.3         | 0.05        | 11.0         | 0.11        | 12.7         |
| poultry dishes                                  | 0.01              | 3.0          | 0.02        | 3.6          | 0.03        | 3.5          |
| sausage dishes                                  | 0.01              | 3.0          | 0.02        | 4.0          | 0.03        | 3.6          |
| <b>Milk, dairy products</b>                     | <b>0.08</b>       | <b>21.5</b>  | <b>0.11</b> | <b>22.8</b>  | <b>0.19</b> | <b>22.3</b>  |
| skimmed milk                                    | 0.02              | 6.3          | 0.08        | 16.1         | 0.10        | 11.8         |
| milk with 1-1.5% fat content                    | 0.03              | 9.3          | 0.02        | 4.2          | 0.05        | 6.4          |
| <b>Sugar, sweets</b>                            | <b>0.00</b>       | <b>0.3</b>   | <b>0.00</b> | <b>0.0</b>   | <b>0.00</b> | <b>0.1</b>   |
| <b>Drinks</b>                                   | <b>0.01</b>       | <b>2.2</b>   | <b>0.00</b> | <b>0.8</b>   | <b>0.01</b> | <b>1.4</b>   |
| <b>Miscellaneous</b>                            | <b>0.02</b>       | <b>4.1</b>   | <b>0.01</b> | <b>1.1</b>   | <b>0.02</b> | <b>2.4</b>   |
| <b>Total</b>                                    | <b>0.37</b>       | <b>100.0</b> | <b>0.47</b> | <b>100.0</b> | <b>0.84</b> | <b>100.0</b> |

Table S 30: Sources of thiamine (mean and population proportion) in the diet on weekdays among Finnish 5- to 6-year-old preschool children who eat three meals at preschool. Main food groups and selected food groups are presented.

|                                                 | Outside preschool |              | Preschool   |              | Total       |              |
|-------------------------------------------------|-------------------|--------------|-------------|--------------|-------------|--------------|
|                                                 | mg/day            | %            | mg/day      | %            | mg/day      | %            |
| <b>Vegetables, vegetable dishes</b>             | <b>0.03</b>       | <b>7.7</b>   | <b>0.04</b> | <b>7.4</b>   | <b>0.07</b> | <b>7.4</b>   |
| <b>Potatoes, potato dishes</b>                  | <b>0.03</b>       | <b>8.1</b>   | <b>0.06</b> | <b>12.1</b>  | <b>0.10</b> | <b>10.4</b>  |
| <b>Fruit, berries, fruit and berry products</b> | <b>0.04</b>       | <b>8.6</b>   | <b>0.02</b> | <b>4.2</b>   | <b>0.06</b> | <b>6.1</b>   |
| fresh fruit                                     | 0.02              | 5.3          | 0.01        | 1.7          | 0.03        | 3.3          |
| <b>Cereals, bakery products</b>                 | <b>0.08</b>       | <b>20.1</b>  | <b>0.13</b> | <b>24.1</b>  | <b>0.21</b> | <b>22.3</b>  |
| rye bread                                       | 0.01              | 2.6          | 0.01        | 2.7          | 0.03        | 2.6          |
| rye crispbread                                  | 0.00              | 0.7          | 0.03        | 5.1          | 0.03        | 3.2          |
| multi-grain bread                               | 0.02              | 4.1          | 0.04        | 7.0          | 0.05        | 5.7          |
| white bread                                     | 0.00              | 1.0          | 0.00        | 0.6          | 0.01        | 0.6          |
| porridge                                        | 0.01              | 2.4          | 0.03        | 5.1          | 0.04        | 3.9          |
| <b>Fats, oils, gravy</b>                        | <b>0.00</b>       | <b>0.2</b>   | <b>0.00</b> | <b>0.0</b>   | <b>0.00</b> | <b>0.1</b>   |
| <b>Fish, fish dishes</b>                        | <b>0.02</b>       | <b>3.6</b>   | <b>0.03</b> | <b>5.1</b>   | <b>0.04</b> | <b>4.4</b>   |
| <b>Eggs, egg dishes</b>                         | <b>0.00</b>       | <b>0.7</b>   | <b>0.00</b> | <b>0.4</b>   | <b>0.01</b> | <b>0.5</b>   |
| <b>Meat, meat dishes</b>                        | <b>0.11</b>       | <b>25.1</b>  | <b>0.12</b> | <b>22.2</b>  | <b>0.22</b> | <b>23.5</b>  |
| cold cuts                                       | 0.01              | 3.3          | 0.02        | 3.0          | 0.03        | 3.2          |
| red meat dishes                                 | 0.06              | 15.3         | 0.06        | 11.9         | 0.13        | 13.4         |
| poultry dishes                                  | 0.01              | 2.6          | 0.02        | 4.0          | 0.03        | 3.5          |
| sausage dishes                                  | 0.02              | 3.6          | 0.02        | 2.8          | 0.03        | 3.2          |
| <b>Milk, dairy products</b>                     | <b>0.08</b>       | <b>20.1</b>  | <b>0.12</b> | <b>22.9</b>  | <b>0.21</b> | <b>21.7</b>  |
| skimmed milk                                    | 0.03              | 6.9          | 0.08        | 15.5         | 0.11        | 11.6         |
| milk with 1-1.5% fat content                    | 0.03              | 6.5          | 0.03        | 4.7          | 0.05        | 5.5          |
| <b>Sugar, sweets</b>                            | <b>0.00</b>       | <b>0.2</b>   | <b>0.00</b> | <b>0.0</b>   | <b>0.00</b> | <b>0.1</b>   |
| <b>Drinks</b>                                   | <b>0.01</b>       | <b>1.2</b>   | <b>0.00</b> | <b>0.6</b>   | <b>0.01</b> | <b>0.8</b>   |
| <b>Miscellaneous</b>                            | <b>0.02</b>       | <b>3.8</b>   | <b>0.01</b> | <b>1.1</b>   | <b>0.02</b> | <b>2.3</b>   |
| <b>Total</b>                                    | <b>0.42</b>       | <b>100.0</b> | <b>0.53</b> | <b>100.0</b> | <b>0.95</b> | <b>100.0</b> |

Table S 31: Sources of riboflavin (mean and population proportion) in the diet on weekdays among Finnish 3- to 4-year-old preschool children who eat three meals at preschool. Main food groups and selected food groups are presented.

|                                                 | Outside preschool |              | Preschool   |              | Total       |              |
|-------------------------------------------------|-------------------|--------------|-------------|--------------|-------------|--------------|
|                                                 | mg/day            | %            | mg/day      | %            | mg/day      | %            |
| <b>Vegetables, vegetable dishes</b>             | <b>0.04</b>       | <b>5.4</b>   | <b>0.04</b> | <b>3.6</b>   | <b>0.08</b> | <b>4.4</b>   |
| <b>Potatoes, potato dishes</b>                  | <b>0.01</b>       | <b>1.2</b>   | <b>0.01</b> | <b>1.3</b>   | <b>0.02</b> | <b>1.3</b>   |
| <b>Fruit, berries, fruit and berry products</b> | <b>0.03</b>       | <b>4.3</b>   | <b>0.03</b> | <b>3.1</b>   | <b>0.06</b> | <b>3.6</b>   |
| <b>Cereals, bakery products</b>                 | <b>0.08</b>       | <b>10.1</b>  | <b>0.11</b> | <b>11.1</b>  | <b>0.19</b> | <b>10.7</b>  |
| <b>Fats, oils, gravy</b>                        | <b>0.00</b>       | <b>0.3</b>   | <b>0.00</b> | <b>0.2</b>   | <b>0.00</b> | <b>0.2</b>   |
| <b>Fish, fish dishes</b>                        | <b>0.01</b>       | <b>1.2</b>   | <b>0.02</b> | <b>1.9</b>   | <b>0.03</b> | <b>1.6</b>   |
| <b>Eggs, egg dishes</b>                         | <b>0.01</b>       | <b>1.2</b>   | <b>0.01</b> | <b>0.9</b>   | <b>0.02</b> | <b>1.0</b>   |
| <b>Meat, meat dishes</b>                        | <b>0.11</b>       | <b>13.8</b>  | <b>0.08</b> | <b>8.4</b>   | <b>0.19</b> | <b>10.8</b>  |
| red meat dishes                                 | 0.07              | 9.6          | 0.04        | 4.3          | 0.12        | 6.6          |
| poultry dishes                                  | 0.02              | 2.8          | 0.02        | 2.3          | 0.04        | 2.5          |
| <b>Milk, dairy products</b>                     | <b>0.45</b>       | <b>58.5</b>  | <b>0.66</b> | <b>67.9</b>  | <b>1.11</b> | <b>63.8</b>  |
| skimmed milk                                    | 0.15              | 19.8         | 0.51        | 51.8         | 0.66        | 37.8         |
| milk with 1-1.5% fat content                    | 0.16              | 21.0         | 0.09        | 9.2          | 0.25        | 14.4         |
| <b>Sugar, sweets</b>                            | <b>0.01</b>       | <b>0.7</b>   | <b>0.00</b> | <b>0.0</b>   | <b>0.01</b> | <b>0.3</b>   |
| <b>Drinks</b>                                   | <b>0.02</b>       | <b>2.2</b>   | <b>0.01</b> | <b>1.1</b>   | <b>0.03</b> | <b>1.6</b>   |
| <b>Miscellaneous</b>                            | <b>0.01</b>       | <b>1.3</b>   | <b>0.00</b> | <b>0.4</b>   | <b>0.01</b> | <b>0.7</b>   |
| <b>Total</b>                                    | <b>0.76</b>       | <b>100.0</b> | <b>0.98</b> | <b>100.0</b> | <b>1.74</b> | <b>100.0</b> |

Table S 32: Sources of riboflavin (mean and population proportion) in the diet on weekdays among Finnish 5- to 6-year-old preschool children who eat three meals at preschool. Main food groups and selected food groups are presented.

|                                                 | Outside preschool |              | Preschool   |              | Total       |              |
|-------------------------------------------------|-------------------|--------------|-------------|--------------|-------------|--------------|
|                                                 | mg/day            | %            | mg/day      | %            | mg/day      | %            |
| <b>Vegetables, vegetable dishes</b>             | <b>0.04</b>       | <b>5.2</b>   | <b>0.04</b> | <b>4.0</b>   | <b>0.09</b> | <b>4.5</b>   |
| <b>Potatoes, potato dishes</b>                  | <b>0.01</b>       | <b>1.1</b>   | <b>0.02</b> | <b>1.5</b>   | <b>0.03</b> | <b>1.3</b>   |
| <b>Fruit, berries, fruit and berry products</b> | <b>0.04</b>       | <b>4.9</b>   | <b>0.03</b> | <b>2.6</b>   | <b>0.07</b> | <b>3.6</b>   |
| <b>Cereals, bakery products</b>                 | <b>0.09</b>       | <b>10.9</b>  | <b>0.12</b> | <b>10.8</b>  | <b>0.21</b> | <b>10.8</b>  |
| <b>Fats, oils, gravy</b>                        | <b>0.00</b>       | <b>0.5</b>   | <b>0.00</b> | <b>0.2</b>   | <b>0.01</b> | <b>0.3</b>   |
| <b>Fish, fish dishes</b>                        | <b>0.01</b>       | <b>1.6</b>   | <b>0.02</b> | <b>1.9</b>   | <b>0.03</b> | <b>1.8</b>   |
| <b>Eggs, egg dishes</b>                         | <b>0.01</b>       | <b>1.2</b>   | <b>0.01</b> | <b>0.6</b>   | <b>0.02</b> | <b>0.8</b>   |
| <b>Meat, meat dishes</b>                        | <b>0.11</b>       | <b>12.7</b>  | <b>0.11</b> | <b>10.0</b>  | <b>0.22</b> | <b>11.2</b>  |
| red meat dishes                                 | 0.07              | 8.7          | 0.06        | 5.2          | 0.13        | 6.6          |
| poultry dishes                                  | 0.02              | 2.5          | 0.03        | 2.6          | 0.05        | 2.5          |
| <b>Milk, dairy products</b>                     | <b>0.49</b>       | <b>58.4</b>  | <b>0.74</b> | <b>67.3</b>  | <b>1.22</b> | <b>63.4</b>  |
| skimmed milk                                    | 0.19              | 23.0         | 0.54        | 49.4         | 0.73        | 38.0         |
| milk with 1-1.5% fat content                    | 0.13              | 15.4         | 0.11        | 10.4         | 0.24        | 12.5         |
| <b>Sugar, sweets</b>                            | <b>0.01</b>       | <b>1.0</b>   | <b>0.00</b> | <b>0.1</b>   | <b>0.01</b> | <b>0.5</b>   |
| <b>Drinks</b>                                   | <b>0.01</b>       | <b>1.7</b>   | <b>0.01</b> | <b>0.7</b>   | <b>0.02</b> | <b>1.1</b>   |
| <b>Miscellaneous</b>                            | <b>0.01</b>       | <b>1.0</b>   | <b>0.00</b> | <b>0.4</b>   | <b>0.01</b> | <b>0.6</b>   |
| <b>Total</b>                                    | <b>0.83</b>       | <b>100.0</b> | <b>1.10</b> | <b>100.0</b> | <b>1.93</b> | <b>100.0</b> |

Table S 33: Sources of niacin equivalents (mean and population proportion) in the diet on weekdays among Finnish 3- to 4-year-old preschool children who eat three meals at preschool. Main food groups and selected food groups are presented.

|                                                 | Outside preschool |              | Preschool   |              | Total       |              |
|-------------------------------------------------|-------------------|--------------|-------------|--------------|-------------|--------------|
|                                                 | mg/day            | %            | mg/day      | %            | mg/day      | %            |
| <b>Vegetables, vegetable dishes</b>             | <b>0.5</b>        | <b>5.2</b>   | <b>0.4</b>  | <b>4.1</b>   | <b>0.9</b>  | <b>4.6</b>   |
| <b>Potatoes, potato dishes</b>                  | <b>0.1</b>        | <b>1.2</b>   | <b>0.2</b>  | <b>1.8</b>   | <b>0.3</b>  | <b>1.5</b>   |
| <b>Fruit, berries, fruit and berry products</b> | <b>0.4</b>        | <b>4.2</b>   | <b>0.3</b>  | <b>2.8</b>   | <b>0.7</b>  | <b>3.5</b>   |
| <b>Cereals, bakery products</b>                 | <b>1.6</b>        | <b>17.7</b>  | <b>2.3</b>  | <b>21.9</b>  | <b>3.9</b>  | <b>19.9</b>  |
| rye bread                                       | 0.1               | 1.3          | 0.2         | 2.1          | 0.3         | 1.7          |
| rye crispbread                                  | 0.0               | 0.3          | 0.2         | 1.9          | 0.2         | 1.2          |
| multi-grain bread                               | 0.3               | 3.3          | 0.7         | 6.7          | 1.0         | 5.1          |
| white bread                                     | 0.1               | 0.8          | 0.1         | 0.6          | 0.1         | 0.7          |
| porridge                                        | 0.2               | 2.3          | 0.7         | 7.0          | 0.9         | 4.8          |
| rice, pasta, etc.                               | 0.2               | 2.6          | 0.1         | 1.0          | 0.3         | 1.7          |
| <b>Fats, oils, gravy</b>                        | <b>0.0</b>        | <b>0.2</b>   | <b>0.0</b>  | <b>0.1</b>   | <b>0.0</b>  | <b>0.1</b>   |
| <b>Fish, fish dishes</b>                        | <b>0.7</b>        | <b>7.5</b>   | <b>1.1</b>  | <b>10.4</b>  | <b>1.8</b>  | <b>9.0</b>   |
| <b>Eggs, egg dishes</b>                         | <b>0.1</b>        | <b>0.9</b>   | <b>0.1</b>  | <b>0.7</b>   | <b>0.2</b>  | <b>0.8</b>   |
| <b>Meat, meat dishes</b>                        | <b>3.2</b>        | <b>34.9</b>  | <b>2.6</b>  | <b>24.5</b>  | <b>5.7</b>  | <b>29.4</b>  |
| cold cuts                                       | 0.2               | 2.4          | 0.2         | 2.3          | 0.5         | 2.3          |
| red meat dishes                                 | 1.8               | 19.7         | 1.3         | 12.0         | 3.0         | 15.6         |
| poultry dishes                                  | 1.0               | 10.5         | 0.7         | 6.5          | 1.6         | 8.4          |
| sausage dishes                                  | 0.2               | 2.1          | 0.4         | 3.4          | 0.6         | 2.8          |
| <b>Milk, dairy products</b>                     | <b>2.3</b>        | <b>25.3</b>  | <b>3.4</b>  | <b>32.5</b>  | <b>5.7</b>  | <b>29.1</b>  |
| skimmed milk                                    | 0.7               | 7.8          | 2.4         | 22.9         | 3.1         | 15.8         |
| milk with 1-1.5% fat content                    | 0.7               | 7.4          | 0.4         | 4.3          | 1.1         | 5.7          |
| <b>Sugar, sweets</b>                            | <b>0.0</b>        | <b>0.4</b>   | <b>0.0</b>  | <b>0.0</b>   | <b>0.0</b>  | <b>0.2</b>   |
| <b>Drinks</b>                                   | <b>0.1</b>        | <b>1.0</b>   | <b>0.1</b>  | <b>0.7</b>   | <b>0.2</b>  | <b>0.8</b>   |
| <b>Miscellaneous</b>                            | <b>0.1</b>        | <b>1.6</b>   | <b>0.0</b>  | <b>0.3</b>   | <b>0.2</b>  | <b>0.9</b>   |
| <b>Total</b>                                    | <b>9.1</b>        | <b>100.0</b> | <b>10.4</b> | <b>100.0</b> | <b>19.5</b> | <b>100.0</b> |

Table S 34: Sources of niacin equivalents (mean and population proportion) in the diet on weekdays among Finnish 5- to 6-year-old preschool children who eat three meals at preschool. Main food groups and selected food groups are presented.

|                                                 | Outside preschool |              | Preschool   |              | Total       |              |
|-------------------------------------------------|-------------------|--------------|-------------|--------------|-------------|--------------|
|                                                 | mg/day            | %            | mg/day      | %            | mg/day      | %            |
| <b>Vegetables, vegetable dishes</b>             | <b>0.5</b>        | <b>4.7</b>   | <b>0.5</b>  | <b>4.5</b>   | <b>1.0</b>  | <b>4.6</b>   |
| <b>Potatoes, potato dishes</b>                  | <b>0.1</b>        | <b>1.4</b>   | <b>0.2</b>  | <b>1.9</b>   | <b>0.4</b>  | <b>1.7</b>   |
| <b>Fruit, berries, fruit and berry products</b> | <b>0.5</b>        | <b>4.4</b>   | <b>0.3</b>  | <b>2.5</b>   | <b>0.8</b>  | <b>3.4</b>   |
| <b>Cereals, bakery products</b>                 | <b>1.9</b>        | <b>18.4</b>  | <b>2.5</b>  | <b>21.8</b>  | <b>4.5</b>  | <b>20.2</b>  |
| rye bread                                       | 0.2               | 1.5          | 0.2         | 1.6          | 0.3         | 1.6          |
| rye crispbread                                  | 0.0               | 0.2          | 0.2         | 1.9          | 0.2         | 1.1          |
| multi-grain bread                               | 0.4               | 3.5          | 0.7         | 6.0          | 1.1         | 4.8          |
| white bread                                     | 0.1               | 1.0          | 0.1         | 1.0          | 0.2         | 1.0          |
| porridge                                        | 0.2               | 2.0          | 0.8         | 7.2          | 1.0         | 4.7          |
| rice, pasta, etc.                               | 0.3               | 2.5          | 0.1         | 1.1          | 0.4         | 1.7          |
| <b>Fats, oils, gravy</b>                        | <b>0.0</b>        | <b>0.3</b>   | <b>0.0</b>  | <b>0.1</b>   | <b>0.0</b>  | <b>0.2</b>   |
| <b>Fish, fish dishes</b>                        | <b>0.7</b>        | <b>7.1</b>   | <b>1.1</b>  | <b>9.8</b>   | <b>1.9</b>  | <b>8.5</b>   |
| <b>Eggs, egg dishes</b>                         | <b>0.1</b>        | <b>0.8</b>   | <b>0.1</b>  | <b>0.5</b>   | <b>0.1</b>  | <b>0.7</b>   |
| <b>Meat, meat dishes</b>                        | <b>3.7</b>        | <b>35.4</b>  | <b>3.0</b>  | <b>25.5</b>  | <b>6.6</b>  | <b>30.2</b>  |
| cold cuts                                       | 0.3               | 2.6          | 0.3         | 2.5          | 0.6         | 2.5          |
| red meat dishes                                 | 2.1               | 20.7         | 1.4         | 12.0         | 3.5         | 16.1         |
| poultry dishes                                  | 1.0               | 9.4          | 0.9         | 7.7          | 1.9         | 8.5          |
| sausage dishes                                  | 0.3               | 2.6          | 0.3         | 2.4          | 0.5         | 2.5          |
| <b>Milk, dairy products</b>                     | <b>2.5</b>        | <b>24.5</b>  | <b>3.8</b>  | <b>32.4</b>  | <b>6.3</b>  | <b>28.7</b>  |
| skimmed milk                                    | 0.9               | 8.7          | 2.6         | 21.9         | 3.5         | 15.7         |
| milk with 1-1.5% fat content                    | 0.5               | 5.2          | 0.6         | 4.7          | 1.1         | 5.0          |
| <b>Sugar, sweets</b>                            | <b>0.0</b>        | <b>0.5</b>   | <b>0.0</b>  | <b>0.1</b>   | <b>0.1</b>  | <b>0.2</b>   |
| <b>Drinks</b>                                   | <b>0.1</b>        | <b>0.6</b>   | <b>0.0</b>  | <b>0.4</b>   | <b>0.1</b>  | <b>0.5</b>   |
| <b>Miscellaneous</b>                            | <b>0.2</b>        | <b>1.8</b>   | <b>0.0</b>  | <b>0.4</b>   | <b>0.2</b>  | <b>1.1</b>   |
| <b>Total</b>                                    | <b>10.3</b>       | <b>100.0</b> | <b>11.7</b> | <b>100.0</b> | <b>22.0</b> | <b>100.0</b> |

Table S 35: Sources of vitamin B6 (mean and population proportion) in the diet on weekdays among Finnish 3- to 4-year-old preschool children who eat three meals at preschool. Main food groups and selected food groups are presented.

|                                                 | Outside preschool |              | Preschool   |              | Total       |              |
|-------------------------------------------------|-------------------|--------------|-------------|--------------|-------------|--------------|
|                                                 | mg/day            | %            | mg/day      | %            | mg/day      | %            |
| <b>Vegetables, vegetable dishes</b>             | <b>0.04</b>       | <b>7.8</b>   | <b>0.04</b> | <b>5.6</b>   | <b>0.08</b> | <b>6.7</b>   |
| <b>Potatoes, potato dishes</b>                  | <b>0.02</b>       | <b>3.4</b>   | <b>0.04</b> | <b>6.3</b>   | <b>0.06</b> | <b>4.9</b>   |
| <b>Fruit, berries, fruit and berry products</b> | <b>0.12</b>       | <b>21.2</b>  | <b>0.07</b> | <b>10.8</b>  | <b>0.19</b> | <b>15.8</b>  |
| <b>Cereals, bakery products</b>                 | <b>0.07</b>       | <b>11.5</b>  | <b>0.11</b> | <b>17.0</b>  | <b>0.17</b> | <b>14.4</b>  |
| <b>Fats, oils, gravy</b>                        | <b>0.00</b>       | <b>0.2</b>   | <b>0.00</b> | <b>0.0</b>   | <b>0.00</b> | <b>0.1</b>   |
| <b>Fish, fish dishes</b>                        | <b>0.03</b>       | <b>5.8</b>   | <b>0.06</b> | <b>9.2</b>   | <b>0.09</b> | <b>7.6</b>   |
| <b>Eggs, egg dishes</b>                         | <b>0.00</b>       | <b>0.7</b>   | <b>0.00</b> | <b>0.5</b>   | <b>0.01</b> | <b>0.6</b>   |
| <b>Meat, meat dishes</b>                        | <b>0.12</b>       | <b>21.8</b>  | <b>0.12</b> | <b>19.3</b>  | <b>0.24</b> | <b>20.5</b>  |
| <b>Milk, dairy products</b>                     | <b>0.12</b>       | <b>21.1</b>  | <b>0.18</b> | <b>28.8</b>  | <b>0.30</b> | <b>25.2</b>  |
| skimmed milk                                    | 0.04              | 7.1          | 0.14        | 21.9         | 0.18        | 14.8         |
| milk with 1-1.5% fat content                    | 0.04              | 7.6          | 0.03        | 4.2          | 0.07        | 5.8          |
| <b>Sugar, sweets</b>                            | <b>0.00</b>       | <b>0.2</b>   | <b>0.00</b> | <b>0.0</b>   | <b>0.00</b> | <b>0.1</b>   |
| <b>Drinks</b>                                   | <b>0.02</b>       | <b>3.7</b>   | <b>0.01</b> | <b>1.6</b>   | <b>0.03</b> | <b>2.6</b>   |
| <b>Miscellaneous</b>                            | <b>0.01</b>       | <b>2.5</b>   | <b>0.00</b> | <b>0.6</b>   | <b>0.02</b> | <b>1.6</b>   |
| <b>Total</b>                                    | <b>0.57</b>       | <b>100.0</b> | <b>0.62</b> | <b>100.0</b> | <b>1.19</b> | <b>100.0</b> |

Table S 36: Sources of vitamin B6 (mean and population proportion) in the diet on weekdays among Finnish 5- to 6-year-old preschool children who eat three meals at preschool. Main food groups and selected food groups are presented.

|                                                 | Outside preschool |              | Preschool   |              | Total       |              |
|-------------------------------------------------|-------------------|--------------|-------------|--------------|-------------|--------------|
|                                                 | mg/day            | %            | mg/day      | %            | mg/day      | %            |
| <b>Vegetables, vegetable dishes</b>             | <b>0.04</b>       | <b>6.9</b>   | <b>0.04</b> | <b>6.1</b>   | <b>0.09</b> | <b>6.5</b>   |
| <b>Potatoes, potato dishes</b>                  | <b>0.02</b>       | <b>3.4</b>   | <b>0.05</b> | <b>6.6</b>   | <b>0.07</b> | <b>5.1</b>   |
| <b>Fruit, berries, fruit and berry products</b> | <b>0.13</b>       | <b>20.5</b>  | <b>0.07</b> | <b>10.5</b>  | <b>0.20</b> | <b>15.2</b>  |
| <b>Cereals, bakery products</b>                 | <b>0.08</b>       | <b>12.0</b>  | <b>0.12</b> | <b>16.5</b>  | <b>0.19</b> | <b>14.3</b>  |
| <b>Fats, oils, gravy</b>                        | <b>0.00</b>       | <b>0.2</b>   | <b>0.00</b> | <b>0.1</b>   | <b>0.00</b> | <b>0.2</b>   |
| <b>Fish, fish dishes</b>                        | <b>0.04</b>       | <b>5.6</b>   | <b>0.06</b> | <b>8.8</b>   | <b>0.10</b> | <b>7.3</b>   |
| <b>Eggs, egg dishes</b>                         | <b>0.00</b>       | <b>0.6</b>   | <b>0.00</b> | <b>0.4</b>   | <b>0.01</b> | <b>0.5</b>   |
| <b>Meat, meat dishes</b>                        | <b>0.14</b>       | <b>22.8</b>  | <b>0.15</b> | <b>20.8</b>  | <b>0.29</b> | <b>21.7</b>  |
| <b>Milk, dairy products</b>                     | <b>0.13</b>       | <b>20.8</b>  | <b>0.20</b> | <b>28.1</b>  | <b>0.33</b> | <b>24.7</b>  |
| skimmed milk                                    | 0.05              | 8.2          | 0.15        | 20.6         | 0.20        | 14.8         |
| milk with 1-1.5% fat content                    | 0.04              | 5.6          | 0.03        | 4.5          | 0.07        | 5.0          |
| <b>Sugar, sweets</b>                            | <b>0.00</b>       | <b>0.3</b>   | <b>0.00</b> | <b>0.0</b>   | <b>0.00</b> | <b>0.2</b>   |
| <b>Drinks</b>                                   | <b>0.03</b>       | <b>4.0</b>   | <b>0.01</b> | <b>1.3</b>   | <b>0.03</b> | <b>2.6</b>   |
| <b>Miscellaneous</b>                            | <b>0.02</b>       | <b>2.9</b>   | <b>0.01</b> | <b>0.8</b>   | <b>0.02</b> | <b>1.8</b>   |
| <b>Total</b>                                    | <b>0.62</b>       | <b>100.0</b> | <b>0.71</b> | <b>100.0</b> | <b>1.33</b> | <b>100.0</b> |



Table S 37: Sources of total folate including folic acid (mean and population proportion) in the diet on weekdays among Finnish 3- to 4-year-old preschool children who eat three meals at preschool. Main food groups and selected food groups are presented.

|                                                 | Outside preschool |              | Preschool         |              | Total             |              |
|-------------------------------------------------|-------------------|--------------|-------------------|--------------|-------------------|--------------|
|                                                 | $\mu\text{g/day}$ | %            | $\mu\text{g/day}$ | %            | $\mu\text{g/day}$ | %            |
| <b>Vegetables, vegetable dishes</b>             | <b>10</b>         | <b>14.3</b>  | <b>11</b>         | <b>12.8</b>  | <b>21</b>         | <b>13.5</b>  |
| fresh vegetables and vegetable salads           | 6                 | 8.8          | 7                 | 8.6          | 13                | 8.7          |
| vegetarian dishes                               | 2                 | 3.1          | 3                 | 3.4          | 5                 | 3.3          |
| warm side dish vegetables                       | 1                 | 2.1          | 1                 | 0.9          | 2                 | 1.4          |
| <b>Potatoes, potato dishes</b>                  | <b>3</b>          | <b>3.9</b>   | <b>5</b>          | <b>5.7</b>   | <b>8</b>          | <b>4.9</b>   |
| <b>Fruit, berries, fruit and berry products</b> | <b>8</b>          | <b>11.9</b>  | <b>7</b>          | <b>7.8</b>   | <b>15</b>         | <b>9.6</b>   |
| fresh fruit                                     | 5                 | 7.5          | 2                 | 2.4          | 7                 | 4.6          |
| 100% juice                                      | 1                 | 1.6          | 1                 | 1.0          | 2                 | 1.2          |
| <b>Cereals, bakery products</b>                 | <b>17</b>         | <b>24.9</b>  | <b>30</b>         | <b>34.6</b>  | <b>47</b>         | <b>30.3</b>  |
| rye bread                                       | 4                 | 5.4          | 7                 | 7.5          | 10                | 6.6          |
| rye crispbread                                  | 1                 | 1.4          | 7                 | 7.6          | 8                 | 4.9          |
| multi-grain bread                               | 4                 | 5.2          | 9                 | 10.0         | 12                | 7.9          |
| white bread                                     | 1                 | 1.1          | 1                 | 0.8          | 1                 | 0.9          |
| porridge                                        | 2                 | 2.5          | 5                 | 5.9          | 7                 | 4.4          |
| rice, pasta, etc.                               | 1                 | 2.1          | 1                 | 0.7          | 2                 | 1.3          |
| <b>Fats, oils, gravy</b>                        | <b>0</b>          | <b>0.3</b>   | <b>0</b>          | <b>0.1</b>   | <b>0</b>          | <b>0.2</b>   |
| <b>Fish, fish dishes</b>                        | <b>1</b>          | <b>1.8</b>   | <b>4</b>          | <b>4.7</b>   | <b>5</b>          | <b>3.4</b>   |
| <b>Eggs, egg dishes</b>                         | <b>1</b>          | <b>2.2</b>   | <b>1</b>          | <b>1.6</b>   | <b>3</b>          | <b>1.8</b>   |
| <b>Meat, meat dishes</b>                        | <b>12</b>         | <b>17.4</b>  | <b>10</b>         | <b>11.4</b>  | <b>22</b>         | <b>14.0</b>  |
| red meat dishes                                 | 9                 | 13.1         | 6                 | 6.7          | 15                | 9.5          |
| poultry dishes                                  | 2                 | 2.9          | 2                 | 2.7          | 4                 | 2.8          |
| <b>Milk, dairy products</b>                     | <b>12</b>         | <b>18.0</b>  | <b>17</b>         | <b>19.4</b>  | <b>29</b>         | <b>18.8</b>  |
| skimmed milk                                    | 3                 | 4.9          | 11                | 12.8         | 14                | 9.4          |
| milk with 1-1.5% fat content                    | 4                 | 5.2          | 2                 | 2.4          | 6                 | 3.6          |
| yoghurt and Finnish cultured milk               | 2                 | 3.0          | 1                 | 0.6          | 3                 | 1.7          |
| cheese                                          | 1                 | 2.1          | 1                 | 0.7          | 2                 | 1.3          |
| <b>Sugar, sweets</b>                            | <b>0</b>          | <b>0.2</b>   | <b>0</b>          | <b>0.0</b>   | <b>0</b>          | <b>0.1</b>   |
| <b>Drinks</b>                                   | <b>2</b>          | <b>2.8</b>   | <b>1</b>          | <b>1.6</b>   | <b>3</b>          | <b>2.1</b>   |
| non-dairy milk substitutes                      | 1                 | 1.9          | 1                 | 1.5          | 3                 | 1.7          |
| <b>Miscellaneous</b>                            | <b>2</b>          | <b>2.3</b>   | <b>0</b>          | <b>0.3</b>   | <b>2</b>          | <b>1.2</b>   |
| <b>Total</b>                                    | <b>68</b>         | <b>100.0</b> | <b>87</b>         | <b>100.0</b> | <b>154</b>        | <b>100.0</b> |

Table S 38: Sources of total folate including folic acid (mean and population proportion) in the diet on weekdays among Finnish 5- to 6-year-old preschool children who eat three meals at preschool. Main food groups and selected food groups are presented.

|                                                 | Outside preschool |              | Preschool         |              | Total             |              |
|-------------------------------------------------|-------------------|--------------|-------------------|--------------|-------------------|--------------|
|                                                 | $\mu\text{g/day}$ | %            | $\mu\text{g/day}$ | %            | $\mu\text{g/day}$ | %            |
| <b>Vegetables, vegetable dishes</b>             | <b>10</b>         | <b>13.5</b>  | <b>14</b>         | <b>14.2</b>  | <b>24</b>         | <b>13.9</b>  |
| fresh vegetables and vegetable salads           | 7                 | 8.9          | 10                | 9.8          | 16                | 9.4          |
| vegetarian dishes                               | 2                 | 2.4          | 3                 | 3.4          | 5                 | 3.0          |
| warm side dish vegetables                       | 1                 | 2.0          | 1                 | 1.0          | 2                 | 1.4          |
| <b>Potatoes, potato dishes</b>                  | <b>3</b>          | <b>4.1</b>   | <b>5</b>          | <b>5.4</b>   | <b>8</b>          | <b>4.9</b>   |
| <b>Fruit, berries, fruit and berry products</b> | <b>11</b>         | <b>14.7</b>  | <b>7</b>          | <b>6.7</b>   | <b>18</b>         | <b>10.1</b>  |
| fresh fruit                                     | 6                 | 7.6          | 2                 | 1.9          | 8                 | 4.3          |
| 100% juice                                      | 2                 | 2.4          | 1                 | 1.3          | 3                 | 1.8          |
| <b>Cereals, bakery products</b>                 | <b>19</b>         | <b>26.2</b>  | <b>33</b>         | <b>32.6</b>  | <b>52</b>         | <b>29.9</b>  |
| rye bread                                       | 4                 | 5.9          | 6                 | 5.8          | 10                | 5.9          |
| rye crispbread                                  | 1                 | 0.9          | 7                 | 7.3          | 8                 | 4.6          |
| multi-grain bread                               | 4                 | 5.7          | 9                 | 9.2          | 14                | 7.8          |
| white bread                                     | 1                 | 1.3          | 1                 | 1.2          | 2                 | 1.2          |
| porridge                                        | 2                 | 2.4          | 6                 | 6.1          | 8                 | 4.5          |
| rice, pasta, etc.                               | 1                 | 2.0          | 1                 | 0.7          | 2                 | 1.2          |
| <b>Fats, oils, gravy</b>                        | <b>0</b>          | <b>0.5</b>   | <b>0</b>          | <b>0.1</b>   | <b>1</b>          | <b>0.3</b>   |
| <b>Fish, fish dishes</b>                        | <b>2</b>          | <b>2.4</b>   | <b>5</b>          | <b>4.8</b>   | <b>7</b>          | <b>3.8</b>   |
| <b>Eggs, egg dishes</b>                         | <b>1</b>          | <b>2.0</b>   | <b>1</b>          | <b>1.1</b>   | <b>3</b>          | <b>1.5</b>   |
| <b>Meat, meat dishes</b>                        | <b>10</b>         | <b>13.3</b>  | <b>15</b>         | <b>15.1</b>  | <b>25</b>         | <b>14.3</b>  |
| red meat dishes                                 | 7                 | 10.1         | 7                 | 6.5          | 14                | 8.0          |
| poultry dishes                                  | 2                 | 2.4          | 3                 | 3.1          | 5                 | 2.8          |
| <b>Milk, dairy products</b>                     | <b>14</b>         | <b>19.5</b>  | <b>19</b>         | <b>18.4</b>  | <b>33</b>         | <b>18.9</b>  |
| skimmed milk                                    | 5                 | 6.5          | 12                | 11.9         | 17                | 9.6          |
| milk with 1-1.5% fat content                    | 3                 | 4.0          | 3                 | 2.6          | 6                 | 3.2          |
| yoghurt and Finnish cultured milk               | 2                 | 3.2          | 0                 | 0.5          | 3                 | 1.6          |
| cheese                                          | 1                 | 1.9          | 1                 | 0.7          | 2                 | 1.2          |
| <b>Sugar, sweets</b>                            | <b>0</b>          | <b>0.2</b>   | <b>0</b>          | <b>0.0</b>   | <b>0</b>          | <b>0.1</b>   |
| <b>Drinks</b>                                   | <b>1</b>          | <b>1.6</b>   | <b>1</b>          | <b>1.2</b>   | <b>2</b>          | <b>1.4</b>   |
| non-dairy milk substitutes                      | 1                 | 0.9          | 1                 | 1.1          | 2                 | 1.0          |
| <b>Miscellaneous</b>                            | <b>2</b>          | <b>2.0</b>   | <b>0</b>          | <b>0.3</b>   | <b>2</b>          | <b>1.1</b>   |
| <b>Total</b>                                    | <b>74</b>         | <b>100.0</b> | <b>100</b>        | <b>100.0</b> | <b>174</b>        | <b>100.0</b> |

Table S 39: Sources of vitamin B12 (mean and population proportion) in the diet on weekdays among Finnish 3- to 4-year-old preschool children who eat three meals at preschool. Main food groups and selected food groups are presented.

|                                                 | Outside preschool |              | Preschool         |              | Total             |              |
|-------------------------------------------------|-------------------|--------------|-------------------|--------------|-------------------|--------------|
|                                                 | $\mu\text{g/day}$ | %            | $\mu\text{g/day}$ | %            | $\mu\text{g/day}$ | %            |
| <b>Vegetables, vegetable dishes</b>             | <b>0.02</b>       | <b>0.9</b>   | <b>0.02</b>       | <b>1.0</b>   | <b>0.04</b>       | <b>1.0</b>   |
| <b>Potatoes, potato dishes</b>                  | <b>0.01</b>       | <b>0.4</b>   | <b>0.00</b>       | <b>0.1</b>   | <b>0.01</b>       | <b>0.2</b>   |
| <b>Fruit, berries, fruit and berry products</b> | <b>0.01</b>       | <b>0.3</b>   | <b>0.02</b>       | <b>0.9</b>   | <b>0.03</b>       | <b>0.6</b>   |
| <b>Cereals, bakery products</b>                 | <b>0.10</b>       | <b>4.5</b>   | <b>0.09</b>       | <b>3.8</b>   | <b>0.19</b>       | <b>4.1</b>   |
| <b>Fats, oils, gravy</b>                        | <b>0.01</b>       | <b>0.3</b>   | <b>0.00</b>       | <b>0.1</b>   | <b>0.01</b>       | <b>0.2</b>   |
| <b>Fish, fish dishes</b>                        | <b>0.28</b>       | <b>12.5</b>  | <b>0.31</b>       | <b>13.9</b>  | <b>0.59</b>       | <b>13.2</b>  |
| <b>Eggs, egg dishes</b>                         | <b>0.06</b>       | <b>2.7</b>   | <b>0.06</b>       | <b>2.5</b>   | <b>0.12</b>       | <b>2.6</b>   |
| <b>Meat, meat dishes</b>                        | <b>0.77</b>       | <b>34.7</b>  | <b>0.29</b>       | <b>12.8</b>  | <b>1.06</b>       | <b>23.7</b>  |
| cold cuts                                       | 0.02              | 0.7          | 0.02              | 0.7          | 0.03              | 0.7          |
| red meat dishes                                 | 0.63              | 28.3         | 0.15              | 6.7          | 0.78              | 17.4         |
| poultry dishes                                  | 0.09              | 4.2          | 0.07              | 3.0          | 0.16              | 3.6          |
| sausage dishes                                  | 0.02              | 0.8          | 0.03              | 1.5          | 0.05              | 1.2          |
| <b>Milk, dairy products</b>                     | <b>0.93</b>       | <b>41.9</b>  | <b>1.42</b>       | <b>63.1</b>  | <b>2.35</b>       | <b>52.6</b>  |
| skimmed milk                                    | 0.32              | 14.2         | 1.06              | 47.0         | 1.38              | 30.7         |
| milk with 1-1.5% fat content                    | 0.34              | 15.2         | 0.20              | 8.9          | 0.54              | 12.0         |
| yoghurt and Finnish cultured milk               | 0.10              | 4.5          | 0.03              | 1.1          | 0.12              | 2.8          |
| cheese                                          | 0.07              | 3.3          | 0.06              | 2.6          | 0.13              | 3.0          |
| dairy-based desserts                            | 0.02              | 1.1          | 0.04              | 1.9          | 0.07              | 1.5          |
| ice-cream                                       | 0.01              | 0.5          | 0.00              | 0.1          | 0.02              | 0.3          |
| <b>Sugar, sweets</b>                            | <b>0.00</b>       | <b>0.0</b>   | <b>0.00</b>       | <b>0.0</b>   | <b>0.00</b>       | <b>0.0</b>   |
| <b>Drinks</b>                                   | <b>0.04</b>       | <b>1.6</b>   | <b>0.04</b>       | <b>1.8</b>   | <b>0.08</b>       | <b>1.7</b>   |
| <b>Miscellaneous</b>                            | <b>0.00</b>       | <b>0.1</b>   | <b>0.00</b>       | <b>0.0</b>   | <b>0.00</b>       | <b>0.1</b>   |
| <b>Total</b>                                    | <b>2.22</b>       | <b>100.0</b> | <b>2.25</b>       | <b>100.0</b> | <b>4.48</b>       | <b>100.0</b> |

Table S 40: Sources of vitamin B12 (mean and population proportion) in the diet on weekdays among Finnish 5- to 6-year-old preschool children who eat three meals at preschool. Main food groups and selected food groups are presented.

|                                                 | Outside preschool |              | Preschool         |              | Total             |              |
|-------------------------------------------------|-------------------|--------------|-------------------|--------------|-------------------|--------------|
|                                                 | $\mu\text{g/day}$ | %            | $\mu\text{g/day}$ | %            | $\mu\text{g/day}$ | %            |
| <b>Vegetables, vegetable dishes</b>             | <b>0.03</b>       | <b>1.4</b>   | <b>0.03</b>       | <b>1.1</b>   | <b>0.06</b>       | <b>1.3</b>   |
| <b>Potatoes, potato dishes</b>                  | <b>0.01</b>       | <b>0.4</b>   | <b>0.00</b>       | <b>0.1</b>   | <b>0.01</b>       | <b>0.2</b>   |
| <b>Fruit, berries, fruit and berry products</b> | <b>0.01</b>       | <b>0.5</b>   | <b>0.02</b>       | <b>0.7</b>   | <b>0.03</b>       | <b>0.6</b>   |
| <b>Cereals, bakery products</b>                 | <b>0.12</b>       | <b>5.2</b>   | <b>0.10</b>       | <b>3.8</b>   | <b>0.21</b>       | <b>4.5</b>   |
| <b>Fats, oils, gravy</b>                        | <b>0.02</b>       | <b>0.7</b>   | <b>0.00</b>       | <b>0.1</b>   | <b>0.02</b>       | <b>0.4</b>   |
| <b>Fish, fish dishes</b>                        | <b>0.29</b>       | <b>13.0</b>  | <b>0.32</b>       | <b>12.5</b>  | <b>0.61</b>       | <b>12.7</b>  |
| <b>Eggs, egg dishes</b>                         | <b>0.06</b>       | <b>2.6</b>   | <b>0.05</b>       | <b>1.8</b>   | <b>0.10</b>       | <b>2.2</b>   |
| <b>Meat, meat dishes</b>                        | <b>0.70</b>       | <b>30.8</b>  | <b>0.40</b>       | <b>15.7</b>  | <b>1.10</b>       | <b>22.8</b>  |
| cold cuts                                       | 0.02              | 0.8          | 0.02              | 0.7          | 0.04              | 0.8          |
| red meat dishes                                 | 0.56              | 24.5         | 0.18              | 7.1          | 0.73              | 15.3         |
| poultry dishes                                  | 0.09              | 3.9          | 0.09              | 3.4          | 0.18              | 3.7          |
| sausage dishes                                  | 0.03              | 1.1          | 0.03              | 1.0          | 0.05              | 1.1          |
| <b>Milk, dairy products</b>                     | <b>1.00</b>       | <b>44.2</b>  | <b>1.58</b>       | <b>62.5</b>  | <b>2.59</b>       | <b>53.9</b>  |
| skimmed milk                                    | 0.41              | 17.9         | 1.14              | 44.8         | 1.54              | 32.1         |
| milk with 1-1.5% fat content                    | 0.27              | 11.9         | 0.25              | 9.9          | 0.52              | 10.8         |
| yoghurt and Finnish cultured milk               | 0.11              | 4.9          | 0.02              | 0.8          | 0.13              | 2.7          |
| cheese                                          | 0.07              | 2.9          | 0.07              | 2.6          | 0.13              | 2.7          |
| dairy-based desserts                            | 0.04              | 1.7          | 0.05              | 2.1          | 0.09              | 1.9          |
| ice-cream                                       | 0.02              | 0.7          | 0.01              | 0.2          | 0.02              | 0.5          |
| <b>Sugar, sweets</b>                            | <b>0.00</b>       | <b>0.0</b>   | <b>0.00</b>       | <b>0.0</b>   | <b>0.00</b>       | <b>0.0</b>   |
| <b>Drinks</b>                                   | <b>0.03</b>       | <b>1.4</b>   | <b>0.04</b>       | <b>1.5</b>   | <b>0.07</b>       | <b>1.5</b>   |
| <b>Miscellaneous</b>                            | <b>0.00</b>       | <b>0.0</b>   | <b>0.00</b>       | <b>0.0</b>   | <b>0.00</b>       | <b>0.0</b>   |
| <b>Total</b>                                    | <b>2.27</b>       | <b>100.0</b> | <b>2.53</b>       | <b>100.0</b> | <b>4.80</b>       | <b>100.0</b> |

Table S 41: Sources of vitamin C (mean and population proportion) in the diet on weekdays among Finnish 3- to 4-year-old preschool children who eat three meals at preschool. Main food groups and selected food groups are presented.

|                                                 | Outside preschool |              | Preschool   |              | Total       |              |
|-------------------------------------------------|-------------------|--------------|-------------|--------------|-------------|--------------|
|                                                 | mg/day            | %            | mg/day      | %            | mg/day      | %            |
| <b>Vegetables, vegetable dishes</b>             | <b>9.0</b>        | <b>27.7</b>  | <b>7.1</b>  | <b>21.6</b>  | <b>16.1</b> | <b>24.6</b>  |
| fresh vegetables and vegetable salads           | 6.9               | 21.3         | 5.8         | 17.6         | 12.7        | 19.5         |
| vegetarian dishes                               | 0.9               | 2.7          | 1.0         | 2.9          | 1.8         | 2.8          |
| warm side dish vegetables                       | 1.2               | 3.5          | 0.3         | 1.0          | 1.5         | 2.3          |
| <b>Potatoes, potato dishes</b>                  | <b>1.3</b>        | <b>3.9</b>   | <b>2.6</b>  | <b>7.8</b>   | <b>3.8</b>  | <b>5.8</b>   |
| <b>Fruit, berries, fruit and berry products</b> | <b>14.3</b>       | <b>44.1</b>  | <b>13.4</b> | <b>40.6</b>  | <b>27.7</b> | <b>42.3</b>  |
| fresh fruit                                     | 8.4               | 25.7         | 3.5         | 10.6         | 11.8        | 18.1         |
| berries                                         | 1.8               | 5.6          | 0.1         | 0.4          | 2.0         | 3.0          |
| fruit and berry soups                           | 0.4               | 1.1          | 3.9         | 11.9         | 4.3         | 6.6          |
| 100% juice                                      | 2.6               | 7.9          | 2.3         | 6.8          | 4.8         | 7.4          |
| smoothies                                       | 0.3               | 0.9          | 1.1         | 3.3          | 1.4         | 2.1          |
| <b>Cereals, bakery products</b>                 | <b>0.4</b>        | <b>1.4</b>   | <b>0.6</b>  | <b>1.9</b>   | <b>1.1</b>  | <b>1.6</b>   |
| <b>Fats, oils, gravy</b>                        | <b>0.0</b>        | <b>0.0</b>   | <b>0.0</b>  | <b>0.1</b>   | <b>0.0</b>  | <b>0.1</b>   |
| <b>Fish, fish dishes</b>                        | <b>0.2</b>        | <b>0.5</b>   | <b>0.9</b>  | <b>2.7</b>   | <b>1.0</b>  | <b>1.6</b>   |
| <b>Eggs, egg dishes</b>                         | <b>0.0</b>        | <b>0.0</b>   | <b>0.0</b>  | <b>0.0</b>   | <b>0.0</b>  | <b>0.0</b>   |
| <b>Meat, meat dishes</b>                        | <b>2.6</b>        | <b>7.9</b>   | <b>2.9</b>  | <b>8.8</b>   | <b>5.5</b>  | <b>8.4</b>   |
| <b>Milk, dairy products</b>                     | <b>3.3</b>        | <b>10.0</b>  | <b>5.0</b>  | <b>15.3</b>  | <b>8.3</b>  | <b>12.7</b>  |
| <b>Sugar, sweets</b>                            | <b>0.0</b>        | <b>0.1</b>   | <b>0.0</b>  | <b>0.0</b>   | <b>0.0</b>  | <b>0.0</b>   |
| <b>Drinks</b>                                   | <b>0.9</b>        | <b>2.7</b>   | <b>0.2</b>  | <b>0.7</b>   | <b>1.1</b>  | <b>1.7</b>   |
| <b>Miscellaneous</b>                            | <b>0.5</b>        | <b>1.7</b>   | <b>0.2</b>  | <b>0.5</b>   | <b>0.7</b>  | <b>1.1</b>   |
| <b>Total</b>                                    | <b>32.5</b>       | <b>100.0</b> | <b>32.9</b> | <b>100.0</b> | <b>65.4</b> | <b>100.0</b> |

Table S 42: Sources of vitamin C (mean and population proportion) in the diet on weekdays among Finnish 5- to 6-year-old preschool children who eat three meals at preschool. Main food groups and selected food groups are presented.

|                                                 | Outside preschool |              | Preschool   |              | Total       |              |
|-------------------------------------------------|-------------------|--------------|-------------|--------------|-------------|--------------|
|                                                 | mg/day            | %            | mg/day      | %            | mg/day      | %            |
| <b>Vegetables, vegetable dishes</b>             | <b>8.8</b>        | <b>22.7</b>  | <b>8.4</b>  | <b>23.9</b>  | <b>17.2</b> | <b>23.3</b>  |
| fresh vegetables and vegetable salads           | 6.8               | 17.6         | 6.7         | 19.1         | 13.6        | 18.3         |
| vegetarian dishes                               | 1.1               | 2.7          | 1.1         | 3.2          | 2.2         | 2.9          |
| warm side dish vegetables                       | 0.9               | 2.3          | 0.6         | 1.6          | 1.5         | 2.0          |
| <b>Potatoes, potato dishes</b>                  | <b>1.4</b>        | <b>3.6</b>   | <b>2.9</b>  | <b>8.1</b>   | <b>4.3</b>  | <b>5.7</b>   |
| <b>Fruit, berries, fruit and berry products</b> | <b>20.1</b>       | <b>51.8</b>  | <b>12.4</b> | <b>35.1</b>  | <b>32.5</b> | <b>43.9</b>  |
| fresh fruit                                     | 9.5               | 24.4         | 3.5         | 10.0         | 13.0        | 17.5         |
| berries                                         | 3.3               | 8.6          | 0.1         | 0.3          | 3.5         | 4.7          |
| fruit and berry soups                           | 1.4               | 3.6          | 2.0         | 5.8          | 3.4         | 4.6          |
| 100% juice                                      | 4.2               | 10.8         | 2.9         | 8.1          | 7.0         | 9.5          |
| smoothies                                       | 0.5               | 1.4          | 1.0         | 2.8          | 1.5         | 2.1          |
| <b>Cereals, bakery products</b>                 | <b>0.7</b>        | <b>1.7</b>   | <b>1.1</b>  | <b>3.0</b>   | <b>1.7</b>  | <b>2.3</b>   |
| <b>Fats, oils, gravy</b>                        | <b>0.0</b>        | <b>0.1</b>   | <b>0.1</b>  | <b>0.1</b>   | <b>0.1</b>  | <b>0.1</b>   |
| <b>Fish, fish dishes</b>                        | <b>0.4</b>        | <b>1.0</b>   | <b>0.9</b>  | <b>2.4</b>   | <b>1.2</b>  | <b>1.7</b>   |
| <b>Eggs, egg dishes</b>                         | <b>0.0</b>        | <b>0.0</b>   | <b>0.0</b>  | <b>0.0</b>   | <b>0.0</b>  | <b>0.0</b>   |
| <b>Meat, meat dishes</b>                        | <b>2.1</b>        | <b>5.5</b>   | <b>3.6</b>  | <b>10.2</b>  | <b>5.7</b>  | <b>7.7</b>   |
| <b>Milk, dairy products</b>                     | <b>3.4</b>        | <b>8.9</b>   | <b>5.6</b>  | <b>15.7</b>  | <b>9.0</b>  | <b>12.2</b>  |
| <b>Sugar, sweets</b>                            | <b>0.3</b>        | <b>0.9</b>   | <b>0.0</b>  | <b>0.0</b>   | <b>0.3</b>  | <b>0.5</b>   |
| <b>Drinks</b>                                   | <b>1.2</b>        | <b>3.0</b>   | <b>0.4</b>  | <b>1.0</b>   | <b>1.5</b>  | <b>2.0</b>   |
| <b>Miscellaneous</b>                            | <b>0.3</b>        | <b>0.8</b>   | <b>0.1</b>  | <b>0.4</b>   | <b>0.5</b>  | <b>0.6</b>   |
| <b>Total</b>                                    | <b>38.7</b>       | <b>100.0</b> | <b>35.3</b> | <b>100.0</b> | <b>74.0</b> | <b>100.0</b> |

Table S 43: Sources of salt (mean and population proportion) in the diet on weekdays among Finnish 3- to 4-year-old preschool children who eat three meals at preschool. Main food groups and selected food groups are presented.

|                                                 | Outside preschool |              | Preschool  |              | Total      |              |
|-------------------------------------------------|-------------------|--------------|------------|--------------|------------|--------------|
|                                                 | g/day             | %            | g/day      | %            | g/day      | %            |
| <b>Vegetables, vegetable dishes</b>             | <b>0.1</b>        | <b>4.6</b>   | <b>0.1</b> | <b>3.7</b>   | <b>0.2</b> | <b>4.1</b>   |
| <b>Potatoes, potato dishes</b>                  | <b>0.1</b>        | <b>3.6</b>   | <b>0.0</b> | <b>1.1</b>   | <b>0.1</b> | <b>2.1</b>   |
| <b>Fruit, berries, fruit and berry products</b> | <b>0.0</b>        | <b>0.3</b>   | <b>0.0</b> | <b>0.5</b>   | <b>0.0</b> | <b>0.4</b>   |
| <b>Cereals, bakery products</b>                 | <b>0.6</b>        | <b>26.5</b>  | <b>1.3</b> | <b>41.0</b>  | <b>1.9</b> | <b>35.2</b>  |
| rye bread                                       | 0.1               | 3.6          | 0.1        | 4.0          | 0.2        | 3.8          |
| rye crispbread                                  | 0.0               | 1.0          | 0.2        | 5.0          | 0.2        | 3.5          |
| multi-grain bread                               | 0.1               | 4.7          | 0.2        | 6.8          | 0.3        | 6.0          |
| white bread                                     | 0.0               | 1.1          | 0.0        | 0.9          | 0.1        | 1.0          |
| porridge                                        | 0.1               | 5.2          | 0.7        | 21.1         | 0.8        | 14.8         |
| rice, pasta, etc.                               | 0.1               | 3.0          | 0.0        | 0.3          | 0.1        | 1.4          |
| savoury bakery products, hamburgers, pizza      | 0.1               | 3.0          | 0.0        | 0.8          | 0.1        | 1.7          |
| pancakes, crpes                                 | 0.0               | 0.7          | 0.0        | 1.0          | 0.0        | 0.9          |
| <b>Fats, oils, gravy</b>                        | <b>0.1</b>        | <b>3.3</b>   | <b>0.2</b> | <b>6.0</b>   | <b>0.3</b> | <b>4.9</b>   |
| <b>Fish, fish dishes</b>                        | <b>0.1</b>        | <b>5.6</b>   | <b>0.2</b> | <b>7.6</b>   | <b>0.4</b> | <b>6.8</b>   |
| <b>Eggs, egg dishes</b>                         | <b>0.0</b>        | <b>0.6</b>   | <b>0.0</b> | <b>0.2</b>   | <b>0.0</b> | <b>0.3</b>   |
| <b>Meat, meat dishes</b>                        | <b>0.7</b>        | <b>32.2</b>  | <b>0.8</b> | <b>23.7</b>  | <b>1.4</b> | <b>27.1</b>  |
| cold cuts                                       | 0.1               | 2.6          | 0.0        | 1.4          | 0.1        | 1.9          |
| red meat dishes                                 | 0.4               | 19.1         | 0.4        | 11.1         | 0.8        | 14.3         |
| poultry dishes                                  | 0.1               | 6.7          | 0.2        | 6.2          | 0.3        | 6.4          |
| sausage dishes                                  | 0.1               | 3.6          | 0.2        | 4.8          | 0.2        | 4.3          |
| <b>Milk, dairy products</b>                     | <b>0.4</b>        | <b>17.2</b>  | <b>0.4</b> | <b>14.0</b>  | <b>0.8</b> | <b>15.3</b>  |
| skimmed milk                                    | 0.1               | 4.2          | 0.3        | 9.3          | 0.4        | 7.3          |
| milk with 1-1.5% fat content                    | 0.1               | 4.2          | 0.1        | 1.6          | 0.1        | 2.6          |
| yoghurt and Finnish cultured milk               | 0.0               | 2.0          | 0.0        | 0.4          | 0.1        | 1.0          |
| cheese                                          | 0.1               | 4.4          | 0.1        | 1.7          | 0.1        | 2.8          |
| <b>Sugar, sweets</b>                            | <b>0.0</b>        | <b>0.4</b>   | <b>0.0</b> | <b>0.0</b>   | <b>0.0</b> | <b>0.2</b>   |
| <b>Drinks</b>                                   | <b>0.0</b>        | <b>0.9</b>   | <b>0.0</b> | <b>0.4</b>   | <b>0.0</b> | <b>0.6</b>   |
| <b>Miscellaneous</b>                            | <b>0.1</b>        | <b>4.9</b>   | <b>0.1</b> | <b>1.7</b>   | <b>0.2</b> | <b>3.0</b>   |
| <b>Total</b>                                    | <b>2.1</b>        | <b>100.0</b> | <b>3.2</b> | <b>100.0</b> | <b>5.3</b> | <b>100.0</b> |

Table S 44: Sources of salt (mean and population proportion) in the diet on weekdays among Finnish 5- to 6-year-old preschool children who eat three meals at preschool. Main food groups and selected food groups are presented.

|                                                 | Outside preschool |              | Preschool  |              | Total      |              |
|-------------------------------------------------|-------------------|--------------|------------|--------------|------------|--------------|
|                                                 | g/day             | %            | g/day      | %            | g/day      | %            |
| <b>Vegetables, vegetable dishes</b>             | <b>0.1</b>        | <b>4.4</b>   | <b>0.2</b> | <b>4.2</b>   | <b>0.3</b> | <b>4.3</b>   |
| <b>Potatoes, potato dishes</b>                  | <b>0.1</b>        | <b>3.5</b>   | <b>0.1</b> | <b>1.5</b>   | <b>0.1</b> | <b>2.3</b>   |
| <b>Fruit, berries, fruit and berry products</b> | <b>0.0</b>        | <b>0.5</b>   | <b>0.0</b> | <b>0.4</b>   | <b>0.0</b> | <b>0.5</b>   |
| <b>Cereals, bakery products</b>                 | <b>0.6</b>        | <b>26.7</b>  | <b>1.5</b> | <b>40.6</b>  | <b>2.1</b> | <b>35.1</b>  |
| rye bread                                       | 0.1               | 3.7          | 0.1        | 3.1          | 0.2        | 3.3          |
| rye crispbread                                  | 0.0               | 0.7          | 0.2        | 4.9          | 0.2        | 3.2          |
| multi-grain bread                               | 0.1               | 5.3          | 0.2        | 6.2          | 0.4        | 5.9          |
| white bread                                     | 0.0               | 1.3          | 0.0        | 1.4          | 0.1        | 1.3          |
| porridge                                        | 0.1               | 5.0          | 0.8        | 21.5         | 0.9        | 14.9         |
| rice, pasta, etc.                               | 0.1               | 2.7          | 0.0        | 0.3          | 0.1        | 1.3          |
| savoury bakery products, hamburgers, pizza      | 0.1               | 2.7          | 0.0        | 1.2          | 0.1        | 1.8          |
| pancakes, crpes                                 | 0.0               | 0.5          | 0.0        | 1.0          | 0.0        | 0.8          |
| <b>Fats, oils, gravy</b>                        | <b>0.1</b>        | <b>3.0</b>   | <b>0.2</b> | <b>6.2</b>   | <b>0.3</b> | <b>4.9</b>   |
| <b>Fish, fish dishes</b>                        | <b>0.2</b>        | <b>7.3</b>   | <b>0.2</b> | <b>6.7</b>   | <b>0.4</b> | <b>6.9</b>   |
| <b>Eggs, egg dishes</b>                         | <b>0.0</b>        | <b>0.6</b>   | <b>0.0</b> | <b>0.1</b>   | <b>0.0</b> | <b>0.3</b>   |
| <b>Meat, meat dishes</b>                        | <b>0.7</b>        | <b>31.4</b>  | <b>0.9</b> | <b>24.8</b>  | <b>1.6</b> | <b>27.4</b>  |
| cold cuts                                       | 0.1               | 2.6          | 0.1        | 1.6          | 0.1        | 2.0          |
| red meat dishes                                 | 0.5               | 19.0         | 0.4        | 11.9         | 0.9        | 14.8         |
| poultry dishes                                  | 0.1               | 5.5          | 0.3        | 7.4          | 0.4        | 6.6          |
| sausage dishes                                  | 0.1               | 4.0          | 0.1        | 3.5          | 0.2        | 3.7          |
| <b>Milk, dairy products</b>                     | <b>0.4</b>        | <b>16.7</b>  | <b>0.5</b> | <b>13.8</b>  | <b>0.9</b> | <b>14.9</b>  |
| skimmed milk                                    | 0.1               | 4.7          | 0.3        | 8.8          | 0.4        | 7.1          |
| milk with 1-1.5% fat content                    | 0.1               | 2.9          | 0.1        | 1.8          | 0.1        | 2.3          |
| yoghurt and Finnish cultured milk               | 0.0               | 2.1          | 0.0        | 0.3          | 0.1        | 1.0          |
| cheese                                          | 0.1               | 4.4          | 0.1        | 1.4          | 0.2        | 2.6          |
| <b>Sugar, sweets</b>                            | <b>0.0</b>        | <b>1.0</b>   | <b>0.0</b> | <b>0.1</b>   | <b>0.0</b> | <b>0.4</b>   |
| <b>Drinks</b>                                   | <b>0.0</b>        | <b>0.5</b>   | <b>0.0</b> | <b>0.2</b>   | <b>0.0</b> | <b>0.3</b>   |
| <b>Miscellaneous</b>                            | <b>0.1</b>        | <b>4.5</b>   | <b>0.1</b> | <b>1.5</b>   | <b>0.2</b> | <b>2.7</b>   |
| <b>Total</b>                                    | <b>2.4</b>        | <b>100.0</b> | <b>3.6</b> | <b>100.0</b> | <b>6.0</b> | <b>100.0</b> |



Table S 45: Sources of potassium (mean and population proportion) in the diet on weekdays among Finnish 3- to 4-year-old preschool children who eat three meals at preschool. Main food groups and selected food groups are presented.

|                                                 | Outside preschool |            | Preschool   |            | Total       |            |
|-------------------------------------------------|-------------------|------------|-------------|------------|-------------|------------|
|                                                 | mg/day            | %          | mg/day      | %          | mg/day      | %          |
| <b>Vegetables, vegetable dishes</b>             | <b>139</b>        | <b>12</b>  | <b>136</b>  | <b>9</b>   | <b>275</b>  | <b>10</b>  |
| <b>Potatoes, potato dishes</b>                  | <b>77</b>         | <b>7</b>   | <b>154</b>  | <b>10</b>  | <b>231</b>  | <b>9</b>   |
| <b>Fruit, berries, fruit and berry products</b> | <b>159</b>        | <b>14</b>  | <b>108</b>  | <b>7</b>   | <b>267</b>  | <b>10</b>  |
| <b>Cereals, bakery products</b>                 | <b>127</b>        | <b>11</b>  | <b>240</b>  | <b>16</b>  | <b>367</b>  | <b>14</b>  |
| <b>Fats, oils, gravy</b>                        | <b>2</b>          | <b>0</b>   | <b>2</b>    | <b>0</b>   | <b>4</b>    | <b>0</b>   |
| <b>Fish, fish dishes</b>                        | <b>34</b>         | <b>3</b>   | <b>91</b>   | <b>6</b>   | <b>125</b>  | <b>5</b>   |
| <b>Eggs, egg dishes</b>                         | <b>3</b>          | <b>0</b>   | <b>3</b>    | <b>0</b>   | <b>6</b>    | <b>0</b>   |
| <b>Meat, meat dishes</b>                        | <b>171</b>        | <b>15</b>  | <b>209</b>  | <b>14</b>  | <b>380</b>  | <b>14</b>  |
| <b>Milk, dairy products</b>                     | <b>371</b>        | <b>33</b>  | <b>558</b>  | <b>37</b>  | <b>929</b>  | <b>35</b>  |
| skimmed milk                                    | 127               | 11         | 424         | 28         | 550         | 21         |
| milk with 1-1.5% fat content                    | 126               | 11         | 75          | 5          | 201         | 8          |
| <b>Sugar, sweets</b>                            | <b>9</b>          | <b>1</b>   | <b>2</b>    | <b>0</b>   | <b>11</b>   | <b>0</b>   |
| <b>Drinks</b>                                   | <b>15</b>         | <b>1</b>   | <b>8</b>    | <b>1</b>   | <b>23</b>   | <b>1</b>   |
| <b>Miscellaneous</b>                            | <b>27</b>         | <b>2</b>   | <b>10</b>   | <b>1</b>   | <b>37</b>   | <b>1</b>   |
| <b>Total</b>                                    | <b>1135</b>       | <b>100</b> | <b>1521</b> | <b>100</b> | <b>2656</b> | <b>100</b> |

Table S 46: Sources of potassium (mean and population proportion) in the diet on weekdays among Finnish 5- to 6-year-old preschool children who eat three meals at preschool. Main food groups and selected food groups are presented.

|                                                 | mg/day      | %          | mg/day      | %          | mg/day      | %          |
|-------------------------------------------------|-------------|------------|-------------|------------|-------------|------------|
| <b>Vegetables, vegetable dishes</b>             | <b>146</b>  | <b>11</b>  | <b>168</b>  | <b>10</b>  | <b>315</b>  | <b>10</b>  |
| <b>Potatoes, potato dishes</b>                  | <b>89</b>   | <b>7</b>   | <b>179</b>  | <b>10</b>  | <b>268</b>  | <b>9</b>   |
| <b>Fruit, berries, fruit and berry products</b> | <b>181</b>  | <b>14</b>  | <b>110</b>  | <b>6</b>   | <b>291</b>  | <b>10</b>  |
| <b>Cereals, bakery products</b>                 | <b>141</b>  | <b>11</b>  | <b>266</b>  | <b>15</b>  | <b>407</b>  | <b>14</b>  |
| <b>Fats, oils, gravy</b>                        | <b>3</b>    | <b>0</b>   | <b>2</b>    | <b>0</b>   | <b>5</b>    | <b>0</b>   |
| <b>Fish, fish dishes</b>                        | <b>48</b>   | <b>4</b>   | <b>98</b>   | <b>6</b>   | <b>146</b>  | <b>5</b>   |
| <b>Eggs, egg dishes</b>                         | <b>4</b>    | <b>0</b>   | <b>2</b>    | <b>0</b>   | <b>6</b>    | <b>0</b>   |
| <b>Meat, meat dishes</b>                        | <b>190</b>  | <b>15</b>  | <b>259</b>  | <b>15</b>  | <b>449</b>  | <b>15</b>  |
| <b>Milk, dairy products</b>                     | <b>411</b>  | <b>32</b>  | <b>622</b>  | <b>36</b>  | <b>1034</b> | <b>34</b>  |
| skimmed milk                                    | 159         | 13         | 454         | 26         | 614         | 20         |
| milk with 1-1.5% fat content                    | 101         | 8          | 94          | 5          | 195         | 6          |
| <b>Sugar, sweets</b>                            | <b>15</b>   | <b>1</b>   | <b>3</b>    | <b>0</b>   | <b>18</b>   | <b>1</b>   |
| <b>Drinks</b>                                   | <b>11</b>   | <b>1</b>   | <b>5</b>    | <b>0</b>   | <b>16</b>   | <b>1</b>   |
| <b>Miscellaneous</b>                            | <b>34</b>   | <b>3</b>   | <b>11</b>   | <b>1</b>   | <b>44</b>   | <b>1</b>   |
| <b>Total</b>                                    | <b>1274</b> | <b>100</b> | <b>1726</b> | <b>100</b> | <b>2999</b> | <b>100</b> |

Table S 47: Sources of phosphorous (mean and population proportion) in the diet on weekdays among Finnish 3- to 4-year-old preschool children who eat three meals at preschool. Main food groups and selected food groups are presented.

|                                                 | Outside preschool |            | Preschool  |            | Total       |            |
|-------------------------------------------------|-------------------|------------|------------|------------|-------------|------------|
|                                                 | mg/day            | %          | mg/day     | %          | mg/day      | %          |
| <b>Vegetables, vegetable dishes</b>             | <b>23</b>         | <b>5</b>   | <b>23</b>  | <b>3</b>   | <b>46</b>   | <b>4</b>   |
| <b>Potatoes, potato dishes</b>                  | <b>9</b>          | <b>2</b>   | <b>17</b>  | <b>3</b>   | <b>27</b>   | <b>2</b>   |
| <b>Fruit, berries, fruit and berry products</b> | <b>16</b>         | <b>3</b>   | <b>16</b>  | <b>2</b>   | <b>32</b>   | <b>3</b>   |
| <b>Cereals, bakery products</b>                 | <b>97</b>         | <b>19</b>  | <b>176</b> | <b>26</b>  | <b>273</b>  | <b>23</b>  |
| <b>Fats, oils, gravy</b>                        | <b>2</b>          | <b>0</b>   | <b>1</b>   | <b>0</b>   | <b>3</b>    | <b>0</b>   |
| <b>Fish, fish dishes</b>                        | <b>17</b>         | <b>3</b>   | <b>32</b>  | <b>5</b>   | <b>49</b>   | <b>4</b>   |
| <b>Eggs, egg dishes</b>                         | <b>5</b>          | <b>1</b>   | <b>5</b>   | <b>1</b>   | <b>10</b>   | <b>1</b>   |
| <b>Meat, meat dishes</b>                        | <b>81</b>         | <b>16</b>  | <b>71</b>  | <b>10</b>  | <b>152</b>  | <b>13</b>  |
| <b>Milk, dairy products</b>                     | <b>235</b>        | <b>47</b>  | <b>335</b> | <b>49</b>  | <b>570</b>  | <b>48</b>  |
| skimmed milk                                    | 71                | 14         | 238        | 35         | 309         | 26         |
| milk with 1-1.5% fat content                    | 76                | 15         | 43         | 6          | 119         | 10         |
| <b>Sugar, sweets</b>                            | <b>4</b>          | <b>1</b>   | <b>0</b>   | <b>0</b>   | <b>4</b>    | <b>0</b>   |
| <b>Drinks</b>                                   | <b>6</b>          | <b>1</b>   | <b>5</b>   | <b>1</b>   | <b>11</b>   | <b>1</b>   |
| <b>Miscellaneous</b>                            | <b>8</b>          | <b>2</b>   | <b>2</b>   | <b>0</b>   | <b>10</b>   | <b>1</b>   |
| <b>Total</b>                                    | <b>503</b>        | <b>100</b> | <b>684</b> | <b>100</b> | <b>1187</b> | <b>100</b> |

Table S 48: Sources of phosphorous (mean and population proportion) in the diet on weekdays among Finnish 5- to 6-year-old preschool children who eat three meals at preschool. Main food groups and selected food groups are presented.

|                                                 | Outside preschool |            | Preschool  |            | Total       |            |
|-------------------------------------------------|-------------------|------------|------------|------------|-------------|------------|
|                                                 | mg/day            | %          | mg/day     | %          | mg/day      | %          |
| <b>Vegetables, vegetable dishes</b>             | <b>24</b>         | <b>4</b>   | <b>29</b>  | <b>4</b>   | <b>53</b>   | <b>4</b>   |
| <b>Potatoes, potato dishes</b>                  | <b>10</b>         | <b>2</b>   | <b>20</b>  | <b>3</b>   | <b>30</b>   | <b>2</b>   |
| <b>Fruit, berries, fruit and berry products</b> | <b>20</b>         | <b>4</b>   | <b>16</b>  | <b>2</b>   | <b>35</b>   | <b>3</b>   |
| <b>Cereals, bakery products</b>                 | <b>106</b>        | <b>19</b>  | <b>194</b> | <b>25</b>  | <b>299</b>  | <b>23</b>  |
| <b>Fats, oils, gravy</b>                        | <b>3</b>          | <b>0</b>   | <b>1</b>   | <b>0</b>   | <b>4</b>    | <b>0</b>   |
| <b>Fish, fish dishes</b>                        | <b>21</b>         | <b>4</b>   | <b>35</b>  | <b>5</b>   | <b>56</b>   | <b>4</b>   |
| <b>Eggs, egg dishes</b>                         | <b>5</b>          | <b>1</b>   | <b>4</b>   | <b>1</b>   | <b>9</b>    | <b>1</b>   |
| <b>Meat, meat dishes</b>                        | <b>90</b>         | <b>16</b>  | <b>89</b>  | <b>12</b>  | <b>179</b>  | <b>14</b>  |
| <b>Milk, dairy products</b>                     | <b>261</b>        | <b>47</b>  | <b>374</b> | <b>49</b>  | <b>635</b>  | <b>48</b>  |
| skimmed milk                                    | 90                | 16         | 256        | 33         | 345         | 26         |
| milk with 1-1.5% fat content                    | 60                | 11         | 54         | 7          | 115         | 9          |
| <b>Sugar, sweets</b>                            | <b>6</b>          | <b>1</b>   | <b>1</b>   | <b>0</b>   | <b>7</b>    | <b>1</b>   |
| <b>Drinks</b>                                   | <b>4</b>          | <b>1</b>   | <b>2</b>   | <b>0</b>   | <b>6</b>    | <b>0</b>   |
| <b>Miscellaneous</b>                            | <b>9</b>          | <b>2</b>   | <b>2</b>   | <b>0</b>   | <b>12</b>   | <b>1</b>   |
| <b>Total</b>                                    | <b>559</b>        | <b>100</b> | <b>767</b> | <b>100</b> | <b>1326</b> | <b>100</b> |

Table S 49: Sources of calcium (mean and population proportion) in the diet on weekdays among Finnish 3- to 4-year-old preschool children who eat three meals at preschool. Main food groups and selected food groups are presented.

|                                                 | Outside preschool |              | Preschool  |              | Total       |              |
|-------------------------------------------------|-------------------|--------------|------------|--------------|-------------|--------------|
|                                                 | mg/day            | %            | mg/day     | %            | mg/day      | %            |
| <b>Vegetables, vegetable dishes</b>             | <b>15</b>         | <b>3.4</b>   | <b>15</b>  | <b>2.6</b>   | <b>30</b>   | <b>3.0</b>   |
| <b>Potatoes, potato dishes</b>                  | <b>3</b>          | <b>0.8</b>   | <b>4</b>   | <b>0.7</b>   | <b>8</b>    | <b>0.8</b>   |
| <b>Fruit, berries, fruit and berry products</b> | <b>12</b>         | <b>2.8</b>   | <b>18</b>  | <b>3.1</b>   | <b>30</b>   | <b>3.0</b>   |
| <b>Cereals, bakery products</b>                 | <b>31</b>         | <b>7.1</b>   | <b>39</b>  | <b>6.9</b>   | <b>70</b>   | <b>7.0</b>   |
| <b>Fats, oils, gravy</b>                        | <b>2</b>          | <b>0.3</b>   | <b>2</b>   | <b>0.3</b>   | <b>3</b>    | <b>0.3</b>   |
| <b>Fish, fish dishes</b>                        | <b>4</b>          | <b>1.0</b>   | <b>9</b>   | <b>1.5</b>   | <b>13</b>   | <b>1.3</b>   |
| <b>Eggs, egg dishes</b>                         | <b>2</b>          | <b>0.4</b>   | <b>1</b>   | <b>0.2</b>   | <b>3</b>    | <b>0.3</b>   |
| <b>Meat, meat dishes</b>                        | <b>21</b>         | <b>4.8</b>   | <b>20</b>  | <b>3.5</b>   | <b>41</b>   | <b>4.1</b>   |
| <b>Milk, dairy products</b>                     | <b>318</b>        | <b>73.4</b>  | <b>448</b> | <b>78.2</b>  | <b>767</b>  | <b>76.1</b>  |
| skimmed milk                                    | 96                | 22.0         | 320        | 55.9         | 416         | 41.3         |
| milk with 1-1.5% fat content                    | 101               | 23.3         | 60         | 10.5         | 161         | 16.0         |
| yoghurt and Finnish cultured milk               | 44                | 10.1         | 13         | 2.2          | 57          | 5.6          |
| cheese                                          | 45                | 10.3         | 32         | 5.6          | 77          | 7.6          |
| milk-based desserts                             | 7                 | 1.7          | 11         | 1.8          | 18          | 1.8          |
| <b>Sugar, sweets</b>                            | <b>6</b>          | <b>1.4</b>   | <b>2</b>   | <b>0.3</b>   | <b>8</b>    | <b>0.8</b>   |
| <b>Drinks</b>                                   | <b>16</b>         | <b>3.7</b>   | <b>14</b>  | <b>2.4</b>   | <b>30</b>   | <b>3.0</b>   |
| <b>Miscellaneous</b>                            | <b>4</b>          | <b>0.8</b>   | <b>1</b>   | <b>0.2</b>   | <b>4</b>    | <b>0.4</b>   |
| <b>Total</b>                                    | <b>434</b>        | <b>100.0</b> | <b>573</b> | <b>100.0</b> | <b>1007</b> | <b>100.0</b> |

Table S 50: Sources of calcium (mean and population proportion) in the diet on weekdays among Finnish 5- to 6-year-old preschool children who eat three meals at preschool. Main food groups and selected food groups are presented.

|                                                 | Outside preschool |              | Preschool  |              | Total       |              |
|-------------------------------------------------|-------------------|--------------|------------|--------------|-------------|--------------|
|                                                 | mg/day            | %            | mg/day     | %            | mg/day      | %            |
| <b>Vegetables, vegetable dishes</b>             | <b>16</b>         | <b>3.3</b>   | <b>19</b>  | <b>3.1</b>   | <b>35</b>   | <b>3.2</b>   |
| <b>Potatoes, potato dishes</b>                  | <b>3</b>          | <b>0.7</b>   | <b>5</b>   | <b>0.9</b>   | <b>9</b>    | <b>0.8</b>   |
| <b>Fruit, berries, fruit and berry products</b> | <b>17</b>         | <b>3.6</b>   | <b>15</b>  | <b>2.4</b>   | <b>33</b>   | <b>2.9</b>   |
| <b>Cereals, bakery products</b>                 | <b>39</b>         | <b>8.0</b>   | <b>44</b>  | <b>6.9</b>   | <b>82</b>   | <b>7.4</b>   |
| <b>Fats, oils, gravy</b>                        | <b>2</b>          | <b>0.4</b>   | <b>2</b>   | <b>0.3</b>   | <b>4</b>    | <b>0.4</b>   |
| <b>Fish, fish dishes</b>                        | <b>6</b>          | <b>1.3</b>   | <b>9</b>   | <b>1.5</b>   | <b>16</b>   | <b>1.4</b>   |
| <b>Eggs, egg dishes</b>                         | <b>1</b>          | <b>0.3</b>   | <b>1</b>   | <b>0.2</b>   | <b>3</b>    | <b>0.2</b>   |
| <b>Meat, meat dishes</b>                        | <b>22</b>         | <b>4.7</b>   | <b>26</b>  | <b>4.1</b>   | <b>48</b>   | <b>4.3</b>   |
| <b>Milk, dairy products</b>                     | <b>350</b>        | <b>72.7</b>  | <b>498</b> | <b>78.8</b>  | <b>848</b>  | <b>76.2</b>  |
| skimmed milk                                    | 122               | 25.3         | 343        | 54.4         | 465         | 41.8         |
| milk with 1-1.5% fat content                    | 81                | 16.8         | 75         | 11.9         | 156         | 14.0         |
| yoghurt and Finnish cultured milk               | 52                | 10.9         | 12         | 1.8          | 64          | 5.7          |
| cheese                                          | 48                | 9.9          | 36         | 5.7          | 84          | 7.5          |
| milk-based desserts                             | 11                | 2.2          | 13         | 2.1          | 24          | 2.2          |
| <b>Sugar, sweets</b>                            | <b>10</b>         | <b>2.0</b>   | <b>2</b>   | <b>0.3</b>   | <b>12</b>   | <b>1.0</b>   |
| <b>Drinks</b>                                   | <b>12</b>         | <b>2.4</b>   | <b>9</b>   | <b>1.4</b>   | <b>20</b>   | <b>1.8</b>   |
| <b>Miscellaneous</b>                            | <b>2</b>          | <b>0.5</b>   | <b>1</b>   | <b>0.1</b>   | <b>3</b>    | <b>0.3</b>   |
| <b>Total</b>                                    | <b>481</b>        | <b>100.0</b> | <b>632</b> | <b>100.0</b> | <b>1113</b> | <b>100.0</b> |

Table S 51: Sources of magnesium (mean and population proportion) in the diet on weekdays among Finnish 3- to 4-year-old preschool children who eat three meals at preschool. Main food groups and selected food groups are presented.

|                                                 | Outside preschool |              | Preschool    |              | Total        |              |
|-------------------------------------------------|-------------------|--------------|--------------|--------------|--------------|--------------|
|                                                 | mg/day            | %            | mg/day       | %            | mg/day       | %            |
| <b>Vegetables, vegetable dishes</b>             | <b>8.5</b>        | <b>8.3</b>   | <b>8.2</b>   | <b>5.6</b>   | <b>16.8</b>  | <b>6.7</b>   |
| <b>Potatoes, potato dishes</b>                  | <b>4.2</b>        | <b>4.0</b>   | <b>8.4</b>   | <b>5.7</b>   | <b>12.5</b>  | <b>5.0</b>   |
| <b>Fruit, berries, fruit and berry products</b> | <b>11.0</b>       | <b>10.7</b>  | <b>7.7</b>   | <b>5.2</b>   | <b>18.7</b>  | <b>7.5</b>   |
| <b>Cereals, bakery products</b>                 | <b>27.2</b>       | <b>26.5</b>  | <b>55.9</b>  | <b>37.9</b>  | <b>83.1</b>  | <b>33.2</b>  |
| rye bread                                       | 4.5               | 4.4          | 7.3          | 5.0          | 11.8         | 4.7          |
| rye crispbread                                  | 1.8               | 1.8          | 15.2         | 10.3         | 17.0         | 6.8          |
| multi-grain bread                               | 4.7               | 4.6          | 10.7         | 7.2          | 15.3         | 6.1          |
| white bread                                     | 0.6               | 0.5          | 0.5          | 0.3          | 1.0          | 0.4          |
| porridge                                        | 5.2               | 5.1          | 17.4         | 11.8         | 22.7         | 9.1          |
| rice, pasta, etc.                               | 3.9               | 3.8          | 1.9          | 1.3          | 5.9          | 2.3          |
| <b>Fats, oils, gravy</b>                        | <b>0.2</b>        | <b>0.2</b>   | <b>0.4</b>   | <b>0.3</b>   | <b>0.6</b>   | <b>0.3</b>   |
| <b>Fish, fish dishes</b>                        | <b>2.3</b>        | <b>2.2</b>   | <b>5.3</b>   | <b>3.6</b>   | <b>7.6</b>   | <b>3.0</b>   |
| <b>Eggs, egg dishes</b>                         | <b>0.3</b>        | <b>0.3</b>   | <b>0.3</b>   | <b>0.2</b>   | <b>0.6</b>   | <b>0.3</b>   |
| <b>Meat, meat dishes</b>                        | <b>12.9</b>       | <b>12.5</b>  | <b>15.3</b>  | <b>10.4</b>  | <b>28.2</b>  | <b>11.3</b>  |
| <b>Milk, dairy products</b>                     | <b>28.5</b>       | <b>27.7</b>  | <b>42.7</b>  | <b>28.9</b>  | <b>71.2</b>  | <b>28.4</b>  |
| skimmed milk                                    | 9.5               | 9.2          | 31.8         | 21.6         | 41.3         | 16.5         |
| milk with 1-1.5% fat content                    | 9.3               | 9.0          | 5.5          | 3.7          | 14.8         | 5.9          |
| <b>Sugar, sweets</b>                            | <b>1.8</b>        | <b>1.8</b>   | <b>0.6</b>   | <b>0.4</b>   | <b>2.5</b>   | <b>1.0</b>   |
| <b>Drinks</b>                                   | <b>2.6</b>        | <b>2.6</b>   | <b>1.9</b>   | <b>1.3</b>   | <b>4.5</b>   | <b>1.8</b>   |
| <b>Miscellaneous</b>                            | <b>3.3</b>        | <b>3.2</b>   | <b>0.7</b>   | <b>0.5</b>   | <b>4.0</b>   | <b>1.6</b>   |
| <b>Total</b>                                    | <b>102.9</b>      | <b>100.0</b> | <b>147.4</b> | <b>100.0</b> | <b>250.3</b> | <b>100.0</b> |

Table S 52: Sources of magnesium (mean and population proportion) in the diet on weekdays among Finnish 5- to 6-year-old preschool children who eat three meals at preschool. Main food groups and selected food groups are presented.

|                                                 | Outside preschool |              | Preschool    |              | Total        |              |
|-------------------------------------------------|-------------------|--------------|--------------|--------------|--------------|--------------|
|                                                 | mg/day            | %            | mg/day       | %            | mg/day       | %            |
| <b>Vegetables, vegetable dishes</b>             | <b>8.7</b>        | <b>7.7</b>   | <b>10.2</b>  | <b>6.2</b>   | <b>18.9</b>  | <b>6.8</b>   |
| <b>Potatoes, potato dishes</b>                  | <b>4.7</b>        | <b>4.2</b>   | <b>9.7</b>   | <b>5.9</b>   | <b>14.4</b>  | <b>5.2</b>   |
| <b>Fruit, berries, fruit and berry products</b> | <b>12.8</b>       | <b>11.3</b>  | <b>7.6</b>   | <b>4.7</b>   | <b>20.5</b>  | <b>7.4</b>   |
| <b>Cereals, bakery products</b>                 | <b>28.8</b>       | <b>25.4</b>  | <b>61.5</b>  | <b>37.5</b>  | <b>90.3</b>  | <b>32.5</b>  |
| rye bread                                       | 5.2               | 4.5          | 6.6          | 4.0          | 11.8         | 4.2          |
| rye crispbread                                  | 1.3               | 1.1          | 16.9         | 10.3         | 18.2         | 6.5          |
| multi-grain bread                               | 5.7               | 5.0          | 11.1         | 6.7          | 16.8         | 6.0          |
| white bread                                     | 0.8               | 0.7          | 0.9          | 0.5          | 1.6          | 0.6          |
| porridge                                        | 5.4               | 4.8          | 19.5         | 11.9         | 24.9         | 9.0          |
| rice, pasta, etc.                               | 3.9               | 3.4          | 2.6          | 1.6          | 6.5          | 2.3          |
| <b>Fats, oils, gravy</b>                        | <b>0.3</b>        | <b>0.3</b>   | <b>0.5</b>   | <b>0.3</b>   | <b>0.8</b>   | <b>0.3</b>   |
| <b>Fish, fish dishes</b>                        | <b>2.9</b>        | <b>2.6</b>   | <b>5.4</b>   | <b>3.3</b>   | <b>8.4</b>   | <b>3.0</b>   |
| <b>Eggs, egg dishes</b>                         | <b>0.3</b>        | <b>0.3</b>   | <b>0.2</b>   | <b>0.1</b>   | <b>0.6</b>   | <b>0.2</b>   |
| <b>Meat, meat dishes</b>                        | <b>14.6</b>       | <b>12.8</b>  | <b>19.1</b>  | <b>11.6</b>  | <b>33.7</b>  | <b>12.1</b>  |
| <b>Milk, dairy products</b>                     | <b>31.4</b>       | <b>27.6</b>  | <b>47.4</b>  | <b>28.9</b>  | <b>78.7</b>  | <b>28.3</b>  |
| skimmed milk                                    | 12.0              | 10.5         | 34.1         | 20.8         | 46.0         | 16.6         |
| milk with 1-1.5% fat content                    | 7.4               | 6.5          | 6.9          | 4.2          | 14.3         | 5.1          |
| <b>Sugar, sweets</b>                            | <b>3.1</b>        | <b>2.8</b>   | <b>0.7</b>   | <b>0.4</b>   | <b>3.8</b>   | <b>1.4</b>   |
| <b>Drinks</b>                                   | <b>1.7</b>        | <b>1.5</b>   | <b>1.0</b>   | <b>0.6</b>   | <b>2.7</b>   | <b>1.0</b>   |
| <b>Miscellaneous</b>                            | <b>4.1</b>        | <b>3.6</b>   | <b>0.9</b>   | <b>0.6</b>   | <b>5.0</b>   | <b>1.8</b>   |
| <b>Total</b>                                    | <b>113.5</b>      | <b>100.0</b> | <b>164.2</b> | <b>100.0</b> | <b>277.7</b> | <b>100.0</b> |

Table S 53: Sources of iron (mean and population proportion) in the diet on weekdays among Finnish 3- to 4-year-old preschool children who eat three meals at preschool. Main food groups and selected food groups are presented.

|                                                 | Outside preschool |              | Preschool   |              | Total       |              |
|-------------------------------------------------|-------------------|--------------|-------------|--------------|-------------|--------------|
|                                                 | mg/day            | %            | mg/day      | %            | mg/day      | %            |
| <b>Vegetables, vegetable dishes</b>             | <b>0.25</b>       | <b>7.7</b>   | <b>0.27</b> | <b>6.6</b>   | <b>0.51</b> | <b>7.1</b>   |
| <b>Potatoes, potato dishes</b>                  | <b>0.12</b>       | <b>3.7</b>   | <b>0.25</b> | <b>6.1</b>   | <b>0.37</b> | <b>5.0</b>   |
| <b>Fruit, berries, fruit and berry products</b> | <b>0.22</b>       | <b>6.8</b>   | <b>0.16</b> | <b>3.9</b>   | <b>0.38</b> | <b>5.2</b>   |
| <b>Cereals, bakery products</b>                 | <b>1.16</b>       | <b>36.4</b>  | <b>2.19</b> | <b>54.0</b>  | <b>3.36</b> | <b>46.2</b>  |
| rye bread                                       | 0.18              | 5.6          | 0.28        | 7.0          | 0.46        | 6.4          |
| rye crispbread                                  | 0.07              | 2.3          | 0.57        | 14.1         | 0.65        | 8.9          |
| multi-grain bread                               | 0.20              | 6.3          | 0.46        | 11.2         | 0.66        | 9.0          |
| white bread                                     | 0.03              | 0.9          | 0.03        | 0.6          | 0.06        | 0.8          |
| porridge                                        | 0.19              | 6.0          | 0.61        | 15.1         | 0.80        | 11.1         |
| rice, pasta, etc.                               | 0.15              | 4.7          | 0.08        | 1.9          | 0.23        | 3.1          |
| <b>Fats, oils, gravy</b>                        | <b>0.01</b>       | <b>0.4</b>   | <b>0.03</b> | <b>0.7</b>   | <b>0.04</b> | <b>0.6</b>   |
| <b>Fish, fish dishes</b>                        | <b>0.08</b>       | <b>2.4</b>   | <b>0.15</b> | <b>3.6</b>   | <b>0.22</b> | <b>3.1</b>   |
| <b>Eggs, egg dishes</b>                         | <b>0.06</b>       | <b>2.0</b>   | <b>0.06</b> | <b>1.4</b>   | <b>0.12</b> | <b>1.7</b>   |
| <b>Meat, meat dishes</b>                        | <b>0.84</b>       | <b>26.1</b>  | <b>0.68</b> | <b>16.7</b>  | <b>1.51</b> | <b>20.8</b>  |
| cold cuts                                       | 0.02              | 0.7          | 0.02        | 0.4          | 0.04        | 0.5          |
| red meat dishes                                 | 0.63              | 19.7         | 0.45        | 11.0         | 1.08        | 14.9         |
| poultry dishes                                  | 0.11              | 3.5          | 0.13        | 3.2          | 0.24        | 3.3          |
| sausage dishes                                  | 0.06              | 1.9          | 0.07        | 1.8          | 0.13        | 1.8          |
| liver and blood foods                           | 0.01              | 0.4          | 0.01        | 0.3          | 0.03        | 0.4          |
| <b>Milk, dairy products</b>                     | <b>0.18</b>       | <b>5.5</b>   | <b>0.17</b> | <b>4.1</b>   | <b>0.34</b> | <b>4.7</b>   |
| <b>Sugar, sweets</b>                            | <b>0.07</b>       | <b>2.0</b>   | <b>0.01</b> | <b>0.3</b>   | <b>0.08</b> | <b>1.1</b>   |
| <b>Drinks</b>                                   | <b>0.10</b>       | <b>3.1</b>   | <b>0.07</b> | <b>1.8</b>   | <b>0.17</b> | <b>2.4</b>   |
| <b>Miscellaneous</b>                            | <b>0.12</b>       | <b>3.8</b>   | <b>0.03</b> | <b>0.7</b>   | <b>0.15</b> | <b>2.1</b>   |
| <b>Total</b>                                    | <b>3.20</b>       | <b>100.0</b> | <b>4.06</b> | <b>100.0</b> | <b>7.26</b> | <b>100.0</b> |

Table S 54: Sources of iron (mean and population proportion) in the diet on weekdays among Finnish 5- to 6-year-old preschool children who eat three meals at preschool. Main food groups and selected food groups are presented.

|                                                 | Outside preschool |              | Preschool   |              | Total       |              |
|-------------------------------------------------|-------------------|--------------|-------------|--------------|-------------|--------------|
|                                                 | mg/day            | %            | mg/day      | %            | mg/day      | %            |
| <b>Vegetables, vegetable dishes</b>             | <b>0.25</b>       | <b>7.0</b>   | <b>0.33</b> | <b>7.2</b>   | <b>0.58</b> | <b>7.1</b>   |
| <b>Potatoes, potato dishes</b>                  | <b>0.13</b>       | <b>3.7</b>   | <b>0.29</b> | <b>6.3</b>   | <b>0.42</b> | <b>5.2</b>   |
| <b>Fruit, berries, fruit and berry products</b> | <b>0.29</b>       | <b>7.9</b>   | <b>0.18</b> | <b>3.9</b>   | <b>0.46</b> | <b>5.6</b>   |
| <b>Cereals, bakery products</b>                 | <b>1.30</b>       | <b>36.0</b>  | <b>2.42</b> | <b>53.1</b>  | <b>3.72</b> | <b>45.6</b>  |
| rye bread                                       | 0.20              | 5.6          | 0.26        | 5.7          | 0.46        | 5.6          |
| rye crispbread                                  | 0.05              | 1.4          | 0.64        | 14.0         | 0.69        | 8.4          |
| multi-grain bread                               | 0.25              | 6.9          | 0.48        | 10.4         | 0.73        | 8.9          |
| white bread                                     | 0.04              | 1.1          | 0.05        | 1.0          | 0.09        | 1.1          |
| porridge                                        | 0.19              | 5.2          | 0.69        | 15.0         | 0.87        | 10.7         |
| rice, pasta, etc.                               | 0.19              | 5.2          | 0.10        | 2.3          | 0.29        | 3.6          |
| <b>Fats, oils, gravy</b>                        | <b>0.02</b>       | <b>0.6</b>   | <b>0.03</b> | <b>0.7</b>   | <b>0.05</b> | <b>0.6</b>   |
| <b>Fish, fish dishes</b>                        | <b>0.09</b>       | <b>2.5</b>   | <b>0.14</b> | <b>3.0</b>   | <b>0.23</b> | <b>2.8</b>   |
| <b>Eggs, egg dishes</b>                         | <b>0.06</b>       | <b>1.7</b>   | <b>0.05</b> | <b>1.0</b>   | <b>0.11</b> | <b>1.3</b>   |
| <b>Meat, meat dishes</b>                        | <b>0.97</b>       | <b>26.8</b>  | <b>0.85</b> | <b>18.6</b>  | <b>1.82</b> | <b>22.2</b>  |
| cold cuts                                       | 0.03              | 0.7          | 0.02        | 0.4          | 0.05        | 0.6          |
| red meat dishes                                 | 0.70              | 19.5         | 0.55        | 12.1         | 1.26        | 15.4         |
| poultry dishes                                  | 0.12              | 3.3          | 0.17        | 3.8          | 0.29        | 3.6          |
| sausage dishes                                  | 0.05              | 1.3          | 0.06        | 1.3          | 0.11        | 1.3          |
| liver and blood foods                           | 0.07              | 2.0          | 0.05        | 1.0          | 0.12        | 1.5          |
| <b>Milk, dairy products</b>                     | <b>0.19</b>       | <b>5.3</b>   | <b>0.19</b> | <b>4.1</b>   | <b>0.38</b> | <b>4.6</b>   |
| <b>Sugar, sweets</b>                            | <b>0.13</b>       | <b>3.5</b>   | <b>0.02</b> | <b>0.5</b>   | <b>0.15</b> | <b>1.8</b>   |
| <b>Drinks</b>                                   | <b>0.06</b>       | <b>1.7</b>   | <b>0.04</b> | <b>0.8</b>   | <b>0.10</b> | <b>1.2</b>   |
| <b>Miscellaneous</b>                            | <b>0.12</b>       | <b>3.4</b>   | <b>0.04</b> | <b>0.8</b>   | <b>0.16</b> | <b>1.9</b>   |
| <b>Total</b>                                    | <b>3.61</b>       | <b>100.0</b> | <b>4.56</b> | <b>100.0</b> | <b>8.17</b> | <b>100.0</b> |

Table S 55: Sources of zinc (mean and population proportion) in the diet on weekdays among Finnish 3- to 4-year-old preschool children who eat three meals at preschool. Main food groups and selected food groups are presented.

|                                                 | Outside preschool |              | Preschool   |              | Total       |              |
|-------------------------------------------------|-------------------|--------------|-------------|--------------|-------------|--------------|
|                                                 | mg/day            | %            | mg/day      | %            | mg/day      | %            |
| <b>Vegetables, vegetable dishes</b>             | <b>0.17</b>       | <b>4.7</b>   | <b>0.18</b> | <b>4.1</b>   | <b>0.35</b> | <b>4.4</b>   |
| <b>Potatoes, potato dishes</b>                  | <b>0.06</b>       | <b>1.6</b>   | <b>0.11</b> | <b>2.4</b>   | <b>0.17</b> | <b>2.1</b>   |
| <b>Fruit, berries, fruit and berry products</b> | <b>0.09</b>       | <b>2.6</b>   | <b>0.09</b> | <b>1.9</b>   | <b>0.18</b> | <b>2.2</b>   |
| <b>Cereals, bakery products</b>                 | <b>0.88</b>       | <b>24.4</b>  | <b>1.66</b> | <b>36.8</b>  | <b>2.54</b> | <b>31.3</b>  |
| rye bread                                       | 0.14              | 3.8          | 0.22        | 4.8          | 0.35        | 4.3          |
| rye crispbread                                  | 0.05              | 1.4          | 0.42        | 9.4          | 0.48        | 5.9          |
| multi-grain bread                               | 0.15              | 4.1          | 0.33        | 7.3          | 0.48        | 5.9          |
| white bread                                     | 0.02              | 0.6          | 0.02        | 0.4          | 0.04        | 0.5          |
| porridge                                        | 0.17              | 4.7          | 0.51        | 11.2         | 0.68        | 8.3          |
| rice, pasta, etc.                               | 0.12              | 3.3          | 0.07        | 1.5          | 0.19        | 2.3          |
| <b>Fats, oils, gravy</b>                        | <b>0.01</b>       | <b>0.2</b>   | <b>0.01</b> | <b>0.1</b>   | <b>0.01</b> | <b>0.2</b>   |
| <b>Fish, fish dishes</b>                        | <b>0.06</b>       | <b>1.7</b>   | <b>0.11</b> | <b>2.5</b>   | <b>0.18</b> | <b>2.2</b>   |
| <b>Eggs, egg dishes</b>                         | <b>0.04</b>       | <b>1.0</b>   | <b>0.03</b> | <b>0.7</b>   | <b>0.07</b> | <b>0.9</b>   |
| <b>Meat, meat dishes</b>                        | <b>1.02</b>       | <b>28.3</b>  | <b>0.89</b> | <b>19.7</b>  | <b>1.91</b> | <b>23.5</b>  |
| cold cuts                                       | 0.04              | 1.2          | 0.04        | 0.9          | 0.08        | 1.0          |
| red meat dishes                                 | 0.76              | 21.0         | 0.57        | 12.6         | 1.33        | 16.4         |
| poultry dishes                                  | 0.14              | 4.0          | 0.14        | 3.1          | 0.29        | 3.5          |
| sausage dishes                                  | 0.07              | 1.9          | 0.13        | 2.9          | 0.20        | 2.4          |
| <b>Milk, dairy products</b>                     | <b>1.13</b>       | <b>31.4</b>  | <b>1.38</b> | <b>30.6</b>  | <b>2.51</b> | <b>31.0</b>  |
| skimmed milk                                    | 0.32              | 8.8          | 1.06        | 23.5         | 1.38        | 16.9         |
| milk with 1-1.5% fat content                    | 0.33              | 9.1          | 0.02        | 0.4          | 0.35        | 4.3          |
| <b>Sugar, sweets</b>                            | <b>0.03</b>       | <b>0.8</b>   | <b>0.00</b> | <b>0.0</b>   | <b>0.03</b> | <b>0.4</b>   |
| <b>Drinks</b>                                   | <b>0.05</b>       | <b>1.5</b>   | <b>0.04</b> | <b>0.9</b>   | <b>0.09</b> | <b>1.1</b>   |
| <b>Miscellaneous</b>                            | <b>0.06</b>       | <b>1.8</b>   | <b>0.01</b> | <b>0.2</b>   | <b>0.08</b> | <b>0.9</b>   |
| <b>Total</b>                                    | <b>3.61</b>       | <b>100.0</b> | <b>4.51</b> | <b>100.0</b> | <b>8.12</b> | <b>100.0</b> |

Table S 56: Sources of zinc (mean and population proportion) in the diet on weekdays among Finnish 5- to 6-year-old preschool children who eat three meals at preschool. Main food groups and selected food groups are presented.

|                                                 | Outside preschool |              | Preschool   |              | Total       |              |
|-------------------------------------------------|-------------------|--------------|-------------|--------------|-------------|--------------|
|                                                 | mg/day            | %            | mg/day      | %            | mg/day      | %            |
| <b>Vegetables, vegetable dishes</b>             | <b>0.19</b>       | <b>4.6</b>   | <b>0.23</b> | <b>4.6</b>   | <b>0.42</b> | <b>4.6</b>   |
| <b>Potatoes, potato dishes</b>                  | <b>0.06</b>       | <b>1.6</b>   | <b>0.13</b> | <b>2.5</b>   | <b>0.19</b> | <b>2.1</b>   |
| <b>Fruit, berries, fruit and berry products</b> | <b>0.11</b>       | <b>2.7</b>   | <b>0.09</b> | <b>1.7</b>   | <b>0.20</b> | <b>2.2</b>   |
| <b>Cereals, bakery products</b>                 | <b>0.97</b>       | <b>23.9</b>  | <b>1.82</b> | <b>36.2</b>  | <b>2.79</b> | <b>30.7</b>  |
| rye bread                                       | 0.16              | 3.9          | 0.20        | 3.9          | 0.36        | 3.9          |
| rye crispbread                                  | 0.04              | 0.9          | 0.47        | 9.3          | 0.51        | 5.6          |
| multi-grain bread                               | 0.18              | 4.5          | 0.34        | 6.8          | 0.53        | 5.8          |
| white bread                                     | 0.03              | 0.7          | 0.03        | 0.7          | 0.06        | 0.7          |
| porridge                                        | 0.17              | 4.2          | 0.56        | 11.1         | 0.73        | 8.0          |
| rice, pasta, etc.                               | 0.13              | 3.3          | 0.08        | 1.6          | 0.21        | 2.4          |
| <b>Fats, oils, gravy</b>                        | <b>0.02</b>       | <b>0.4</b>   | <b>0.01</b> | <b>0.1</b>   | <b>0.02</b> | <b>0.2</b>   |
| <b>Fish, fish dishes</b>                        | <b>0.08</b>       | <b>1.9</b>   | <b>0.12</b> | <b>2.3</b>   | <b>0.20</b> | <b>2.1</b>   |
| <b>Eggs, egg dishes</b>                         | <b>0.04</b>       | <b>0.9</b>   | <b>0.03</b> | <b>0.5</b>   | <b>0.06</b> | <b>0.7</b>   |
| <b>Meat, meat dishes</b>                        | <b>1.21</b>       | <b>29.9</b>  | <b>1.07</b> | <b>21.3</b>  | <b>2.28</b> | <b>25.1</b>  |
| cold cuts                                       | 0.05              | 1.2          | 0.05        | 1.0          | 0.10        | 1.1          |
| red meat dishes                                 | 0.91              | 22.5         | 0.71        | 14.2         | 1.62        | 17.9         |
| poultry dishes                                  | 0.16              | 3.8          | 0.18        | 3.6          | 0.34        | 3.7          |
| sausage dishes                                  | 0.09              | 2.3          | 0.10        | 2.0          | 0.19        | 2.1          |
| <b>Milk, dairy products</b>                     | <b>1.24</b>       | <b>30.5</b>  | <b>1.51</b> | <b>30.0</b>  | <b>2.75</b> | <b>30.2</b>  |
| skimmed milk                                    | 0.40              | 9.8          | 1.14        | 22.5         | 1.53        | 16.9         |
| milk with 1-1.5% fat content                    | 0.26              | 6.5          | 0.04        | 0.8          | 0.30        | 3.3          |
| <b>Sugar, sweets</b>                            | <b>0.05</b>       | <b>1.1</b>   | <b>0.01</b> | <b>0.1</b>   | <b>0.05</b> | <b>0.6</b>   |
| <b>Drinks</b>                                   | <b>0.03</b>       | <b>0.7</b>   | <b>0.02</b> | <b>0.3</b>   | <b>0.05</b> | <b>0.5</b>   |
| <b>Miscellaneous</b>                            | <b>0.07</b>       | <b>1.8</b>   | <b>0.02</b> | <b>0.3</b>   | <b>0.09</b> | <b>1.0</b>   |
| <b>Total</b>                                    | <b>4.05</b>       | <b>100.0</b> | <b>5.04</b> | <b>100.0</b> | <b>9.09</b> | <b>100.0</b> |



Table S 57: Sources of iodine (mean and population proportion) in the diet on weekdays among Finnish 3- to 4-year-old preschool children who eat three meals at preschool. Main food groups and selected food groups are presented.

|                                                 | Outside preschool |              | Preschool         |              | Total             |              |
|-------------------------------------------------|-------------------|--------------|-------------------|--------------|-------------------|--------------|
|                                                 | $\mu\text{g/day}$ | %            | $\mu\text{g/day}$ | %            | $\mu\text{g/day}$ | %            |
| <b>Vegetables, vegetable dishes</b>             | <b>2.3</b>        | <b>2.8</b>   | <b>2.4</b>        | <b>2.1</b>   | <b>4.6</b>        | <b>2.4</b>   |
| <b>Potatoes, potato dishes</b>                  | <b>2.3</b>        | <b>2.8</b>   | <b>1.0</b>        | <b>0.8</b>   | <b>3.2</b>        | <b>1.7</b>   |
| <b>Fruit, berries, fruit and berry products</b> | <b>1.2</b>        | <b>1.4</b>   | <b>1.9</b>        | <b>1.7</b>   | <b>3.1</b>        | <b>1.6</b>   |
| <b>Cereals, bakery products</b>                 | <b>13.2</b>       | <b>16.2</b>  | <b>27.4</b>       | <b>24.0</b>  | <b>40.6</b>       | <b>20.8</b>  |
| porridge                                        | 4.5               | 5.5          | 20.9              | 18.4         | 25.4              | 13.0         |
| <b>Fats, oils, gravy</b>                        | <b>0.8</b>        | <b>1.0</b>   | <b>0.6</b>        | <b>0.6</b>   | <b>1.4</b>        | <b>0.7</b>   |
| <b>Fish, fish dishes</b>                        | <b>5.8</b>        | <b>7.1</b>   | <b>12.3</b>       | <b>10.8</b>  | <b>18.2</b>       | <b>9.3</b>   |
| <b>Eggs, egg dishes</b>                         | <b>1.3</b>        | <b>1.6</b>   | <b>1.0</b>        | <b>0.9</b>   | <b>2.3</b>        | <b>1.2</b>   |
| <b>Meat, meat dishes</b>                        | <b>12.8</b>       | <b>15.8</b>  | <b>9.5</b>        | <b>8.3</b>   | <b>22.3</b>       | <b>11.4</b>  |
| <b>Milk, dairy products</b>                     | <b>38.9</b>       | <b>47.8</b>  | <b>56.7</b>       | <b>49.8</b>  | <b>95.6</b>       | <b>49.0</b>  |
| skimmed milk                                    | 12.7              | 15.5         | 42.4              | 37.2         | 55.0              | 28.2         |
| milk with 1-1.5% fat content                    | 13.5              | 16.5         | 8.0               | 7.0          | 21.5              | 11.0         |
| <b>Sugar, sweets</b>                            | <b>0.7</b>        | <b>0.8</b>   | <b>0.1</b>        | <b>0.0</b>   | <b>0.7</b>        | <b>0.4</b>   |
| <b>Drinks</b>                                   | <b>0.4</b>        | <b>0.5</b>   | <b>0.2</b>        | <b>0.2</b>   | <b>0.6</b>        | <b>0.3</b>   |
| <b>Miscellaneous</b>                            | <b>1.7</b>        | <b>2.1</b>   | <b>0.9</b>        | <b>0.8</b>   | <b>2.6</b>        | <b>1.3</b>   |
| <b>Total</b>                                    | <b>81.4</b>       | <b>100.0</b> | <b>113.9</b>      | <b>100.0</b> | <b>195.3</b>      | <b>100.0</b> |

Table S 58: Sources of iodine (mean and population proportion) in the diet on weekdays among Finnish 5- to 6-year-old preschool children who eat three meals at preschool. Main food groups and selected food groups are presented.

|                                                 | Outside preschool |              | Preschool         |              | Total             |              |
|-------------------------------------------------|-------------------|--------------|-------------------|--------------|-------------------|--------------|
|                                                 | $\mu\text{g/day}$ | %            | $\mu\text{g/day}$ | %            | $\mu\text{g/day}$ | %            |
| <b>Vegetables, vegetable dishes</b>             | <b>2.6</b>        | <b>2.8</b>   | <b>3.0</b>        | <b>2.3</b>   | <b>5.5</b>        | <b>2.5</b>   |
| <b>Potatoes, potato dishes</b>                  | <b>2.6</b>        | <b>2.8</b>   | <b>1.2</b>        | <b>1.0</b>   | <b>3.8</b>        | <b>1.7</b>   |
| <b>Fruit, berries, fruit and berry products</b> | <b>1.5</b>        | <b>1.6</b>   | <b>1.8</b>        | <b>1.4</b>   | <b>3.3</b>        | <b>1.5</b>   |
| <b>Cereals, bakery products</b>                 | <b>15.3</b>       | <b>16.6</b>  | <b>31.8</b>       | <b>24.8</b>  | <b>47.1</b>       | <b>21.4</b>  |
| porridge                                        | 4.8               | 5.3          | 24.1              | 18.8         | 29.0              | 13.1         |
| <b>Fats, oils, gravy</b>                        | <b>0.9</b>        | <b>1.0</b>   | <b>0.8</b>        | <b>0.7</b>   | <b>1.8</b>        | <b>0.8</b>   |
| <b>Fish, fish dishes</b>                        | <b>8.3</b>        | <b>9.0</b>   | <b>13.6</b>       | <b>10.6</b>  | <b>21.8</b>       | <b>9.9</b>   |
| <b>Eggs, egg dishes</b>                         | <b>1.2</b>        | <b>1.3</b>   | <b>0.8</b>        | <b>0.6</b>   | <b>2.1</b>        | <b>0.9</b>   |
| <b>Meat, meat dishes</b>                        | <b>14.1</b>       | <b>15.3</b>  | <b>11.3</b>       | <b>8.8</b>   | <b>25.4</b>       | <b>11.5</b>  |
| <b>Milk, dairy products</b>                     | <b>42.5</b>       | <b>46.1</b>  | <b>62.9</b>       | <b>49.0</b>  | <b>105.4</b>      | <b>47.8</b>  |
| skimmed milk                                    | 15.9              | 17.3         | 45.4              | 35.4         | 61.4              | 27.9         |
| milk with 1-1.5% fat content                    | 10.8              | 11.7         | 10.0              | 7.8          | 20.8              | 9.4          |
| <b>Sugar, sweets</b>                            | <b>1.3</b>        | <b>1.5</b>   | <b>0.2</b>        | <b>0.1</b>   | <b>1.5</b>        | <b>0.7</b>   |
| <b>Drinks</b>                                   | <b>0.3</b>        | <b>0.4</b>   | <b>0.1</b>        | <b>0.1</b>   | <b>0.5</b>        | <b>0.2</b>   |
| <b>Miscellaneous</b>                            | <b>1.4</b>        | <b>1.5</b>   | <b>0.8</b>        | <b>0.6</b>   | <b>2.2</b>        | <b>1.0</b>   |
| <b>Total</b>                                    | <b>92.0</b>       | <b>100.0</b> | <b>128.4</b>      | <b>100.0</b> | <b>220.4</b>      | <b>100.0</b> |
